# Supplementary material
Source: PubMed Central journal article supplement (PMC6873108)
Supplement: jm9b01120_si_001.pdf [file jm9b01120_si_001.pdf]

## Supporting Information

### Anti-Biofilm Agents against *Pseudomonas aeruginosa*: a Structure-Activity Relationship Study of C-Glycosidic LecB Inhibitors

Roman Sommer<sup>1,2</sup>, Katharina Rox<sup>2,3</sup>, Stefanie Wagner<sup>1,2</sup>, Dirk Hauck<sup>1,2</sup>, Sarah S. Henrikus<sup>1,2,6</sup>, Shelby Newsad<sup>1,2</sup>, Tatjana Arnold<sup>2,3</sup>, Thomas Ryckmans<sup>4</sup>, Mark Brönstrup<sup>2,3</sup>, Anne Imberty<sup>5</sup>, Annabelle Varrot<sup>5</sup>, Rolf W. Hartmann<sup>2,6,7</sup>, and Alexander Titz<sup>1,2,6\*</sup>

<sup>1</sup>Chemical Biology of Carbohydrates, Helmholtz Institute for Pharmaceutical Research Saarland (HIPS), Helmholtz Centre for Infection Research, D-66123 Saarbrücken, Germany

<sup>2</sup>Deutsches Zentrum für Infektionsforschung (DZIF), Standort Hannover-Braunschweig, Germany

<sup>3</sup>Chemical Biology, Helmholtz Centre for Infection Research, D-38124 Braunschweig, Germany

<sup>4</sup>Roche Pharmaceutical Research and Early Development, Roche Innovation Center Basel, CH-4070 Basel, Switzerland

<sup>5</sup>Univ. Grenoble Alpes, CNRS, CERMAV, 38000 Grenoble, France

<sup>6</sup>Department of Pharmacy, Saarland University, D-66123 Saarbrücken, Germany

<sup>7</sup>Drug Design and Development, Helmholtz Institute for Pharmaceutical Research Saarland (HIPS), Helmholtz Centre for Infection Research, D-66123 Saarbrücken, Germany

## Table of contents

|                                                                                                                                                |     |
|------------------------------------------------------------------------------------------------------------------------------------------------|-----|
| <sup>1</sup> H, <sup>13</sup> C and <sup>19</sup> F-NMR spectra of new compounds                                                               | S3  |
| Table S1: ITC measurements with <b>22</b>                                                                                                      | S34 |
| Table S2: Data collection and refinement statistics for LecB <sub>PA14</sub> structure in complex with <b>22</b>                               | S35 |
| Table S3: m/z search window for plasma stability assay                                                                                         | S36 |
| Table S4: : Mass transitions of compounds                                                                                                      | S37 |
| Figure S1: Rationale for the extension of the thiophene moiety in <b>7</b> to target an additional patch or a subpocket on the surface of LecB | S38 |
| Figure S2: Purity of key compounds <b>17</b> , <b>22</b> , <b>23</b> , <b>27</b> , <b>29</b> by HPLC-UV                                        | S38 |

## Table of contents

|                                                                                                                                                |     |
|------------------------------------------------------------------------------------------------------------------------------------------------|-----|
| $^1\text{H}$ , $^{13}\text{C}$ and $^{19}\text{F}$ -NMR spectra of new compounds                                                               | S3  |
| Table S1: ITC measurements with <b>22</b>                                                                                                      | S34 |
| Table S2: Data collection and refinement statistics for LecB <sub>PA14</sub> structure in complex with <b>22</b>                               | S35 |
| Table S3: m/z search window for plasma stability assay                                                                                         | S36 |
| Table S4: : Mass transitions of compounds                                                                                                      | S37 |
| Figure S1: Rationale for the extension of the thiophene moiety in <b>7</b> to target an additional patch or a subpocket on the surface of LecB | S38 |
| Figure S2: Purity of key compounds <b>17</b> , <b>22</b> , <b>23</b> , <b>27</b> , <b>29</b> by HPLC-UV                                        | S38 |

# $^1\text{H}$ , $^{13}\text{C}$ and $^{19}\text{F}$ spectra of new compounds

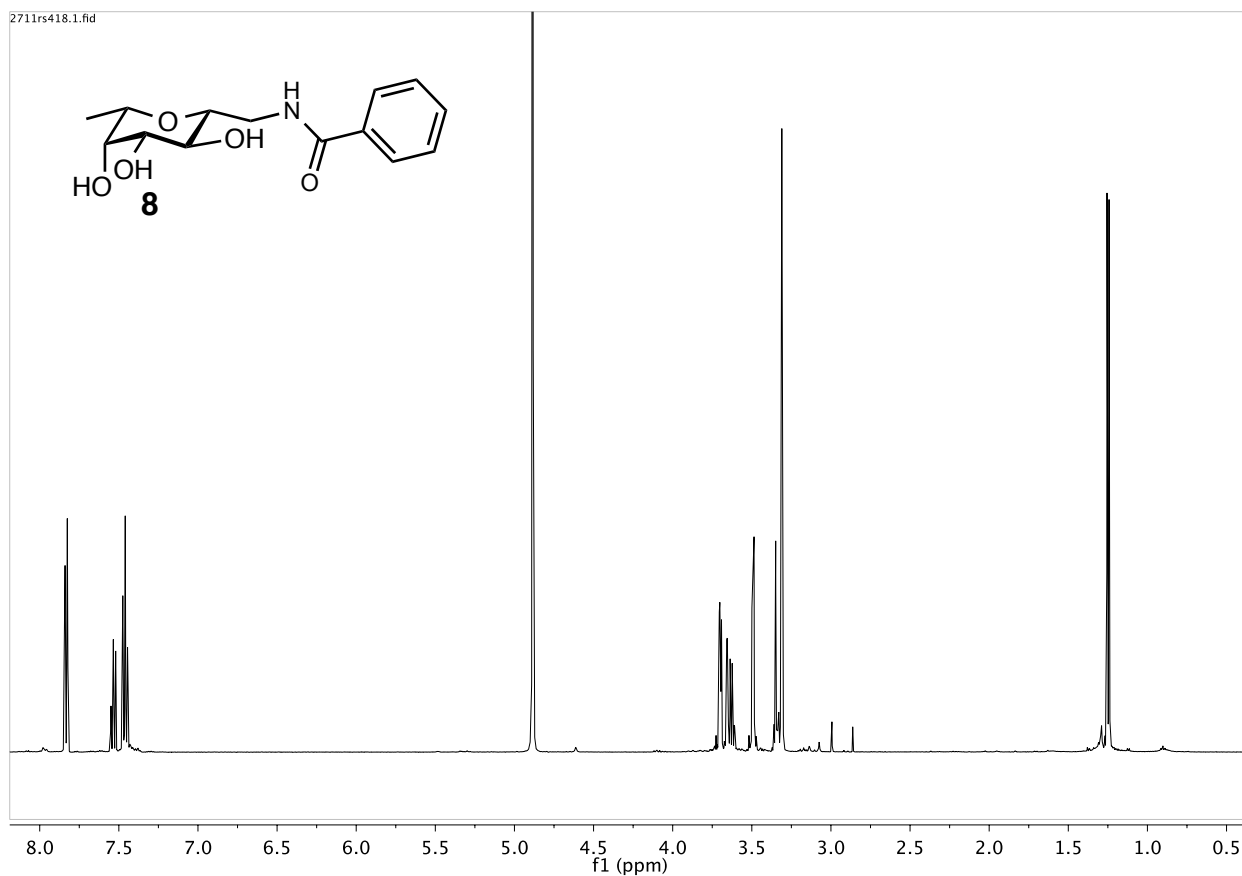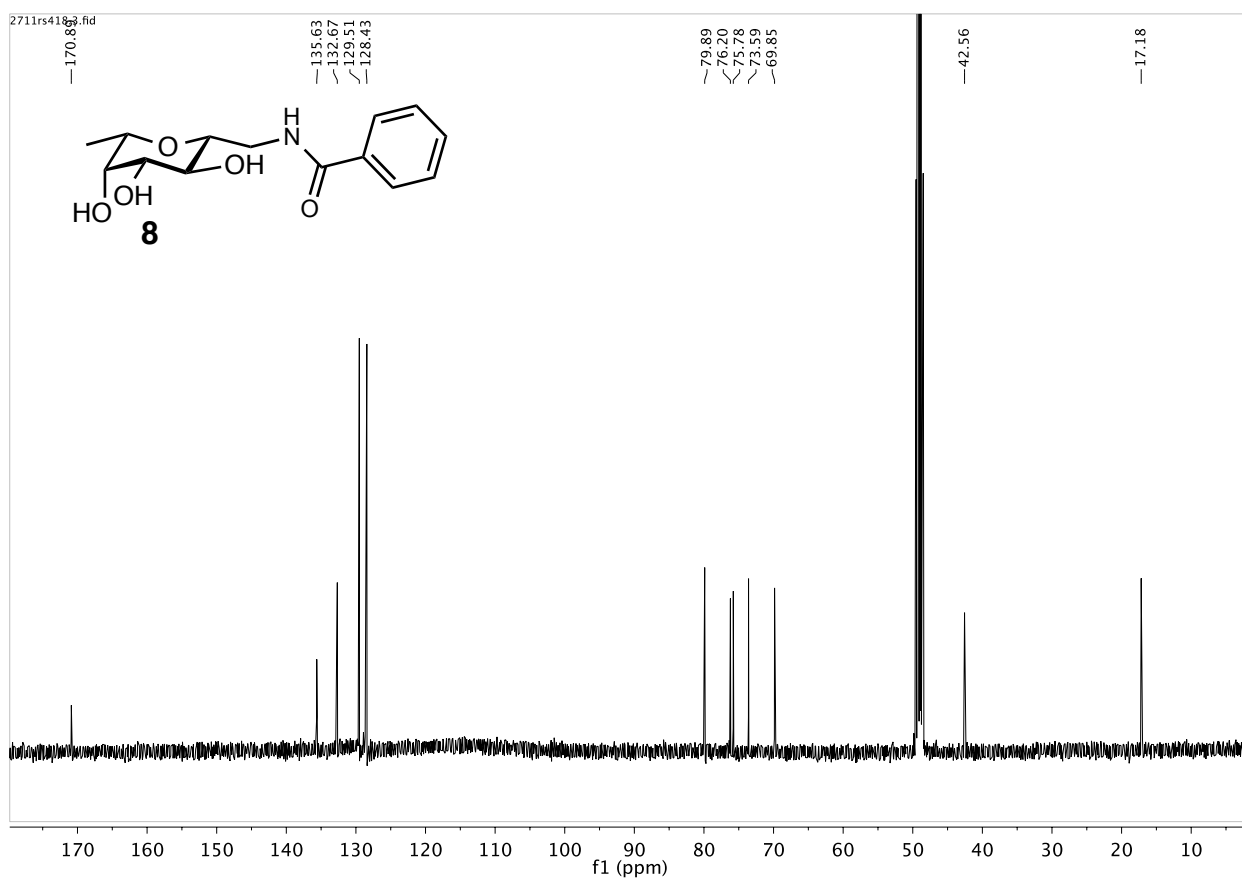

# $^1\text{H}$ , $^{13}\text{C}$ and $^{19}\text{F}$ spectra of new compounds

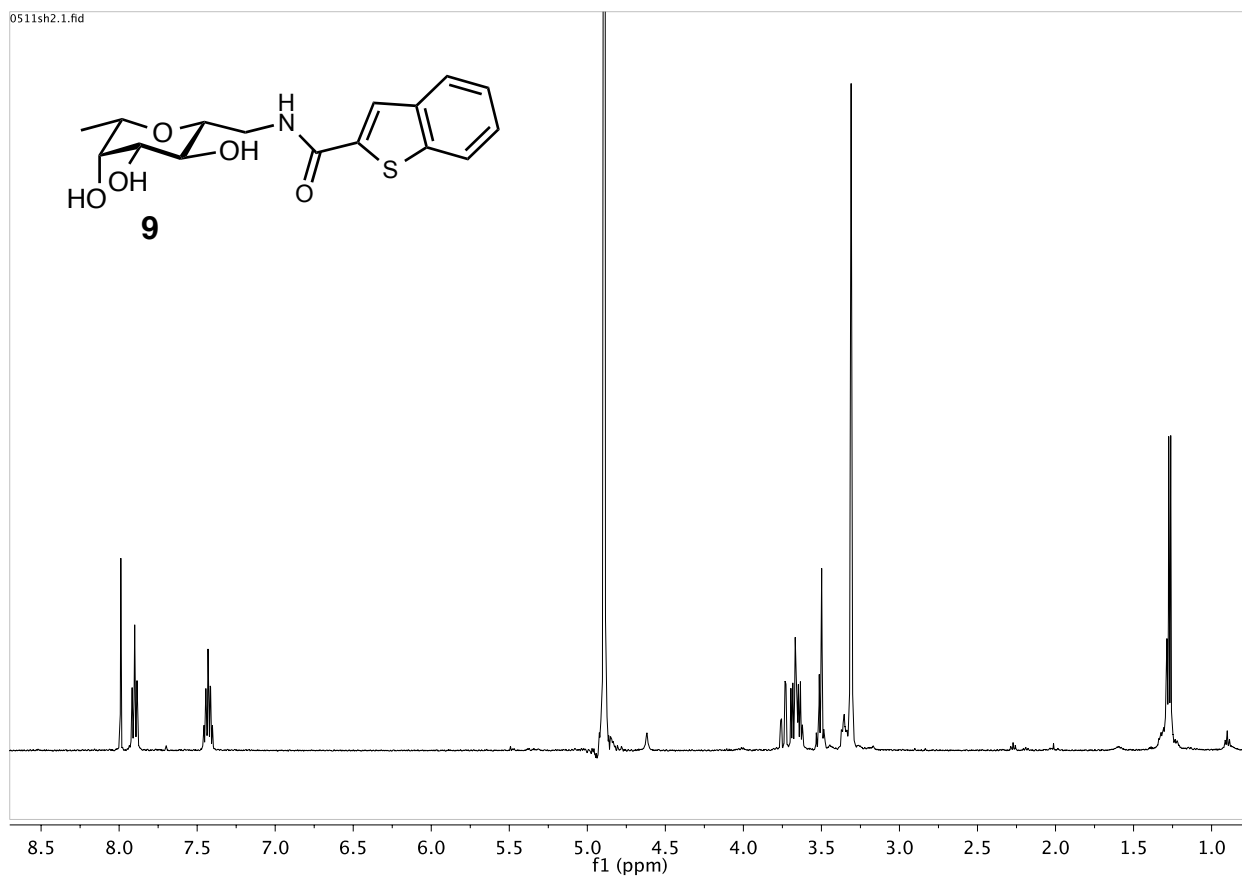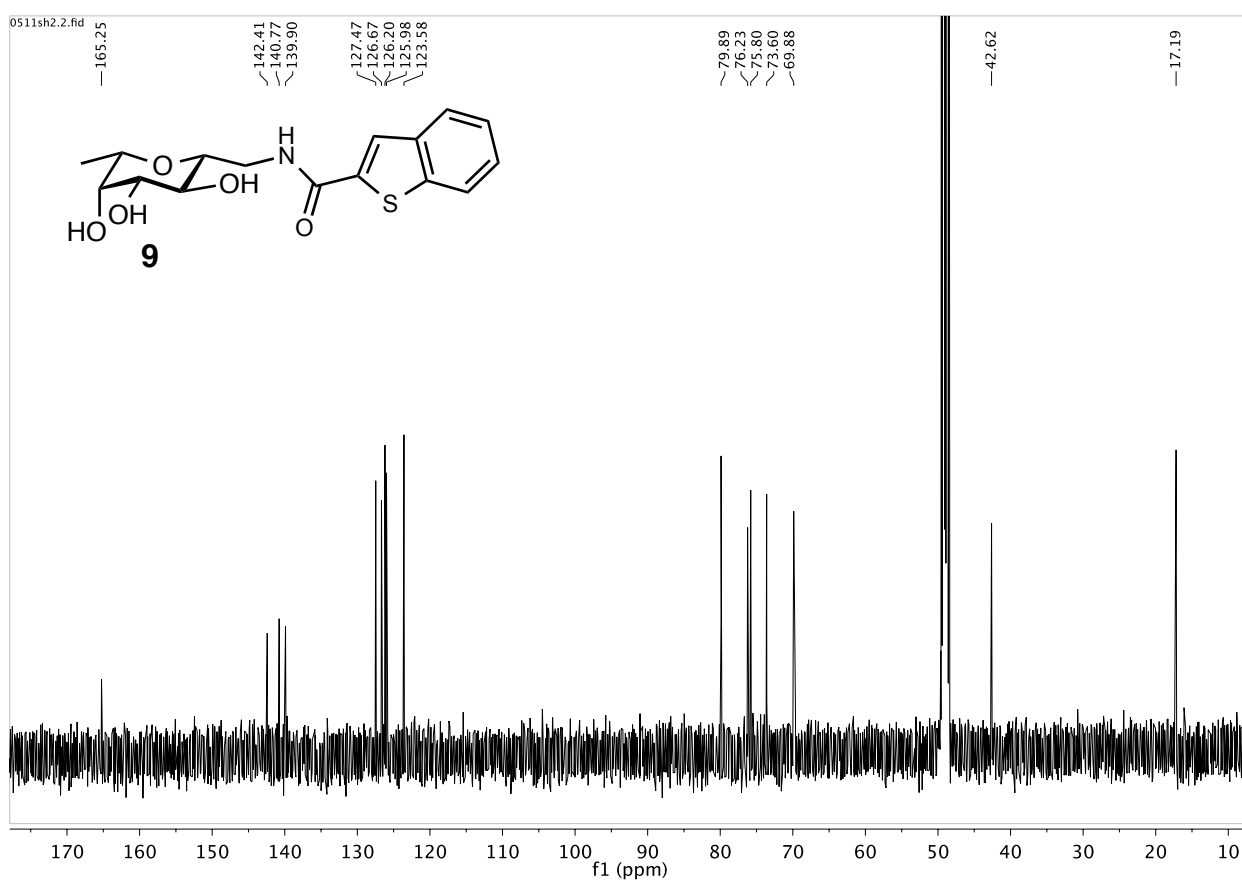

$^1\text{H}$ ,  $^{13}\text{C}$  and  $^{19}\text{F}$  spectra of new compounds

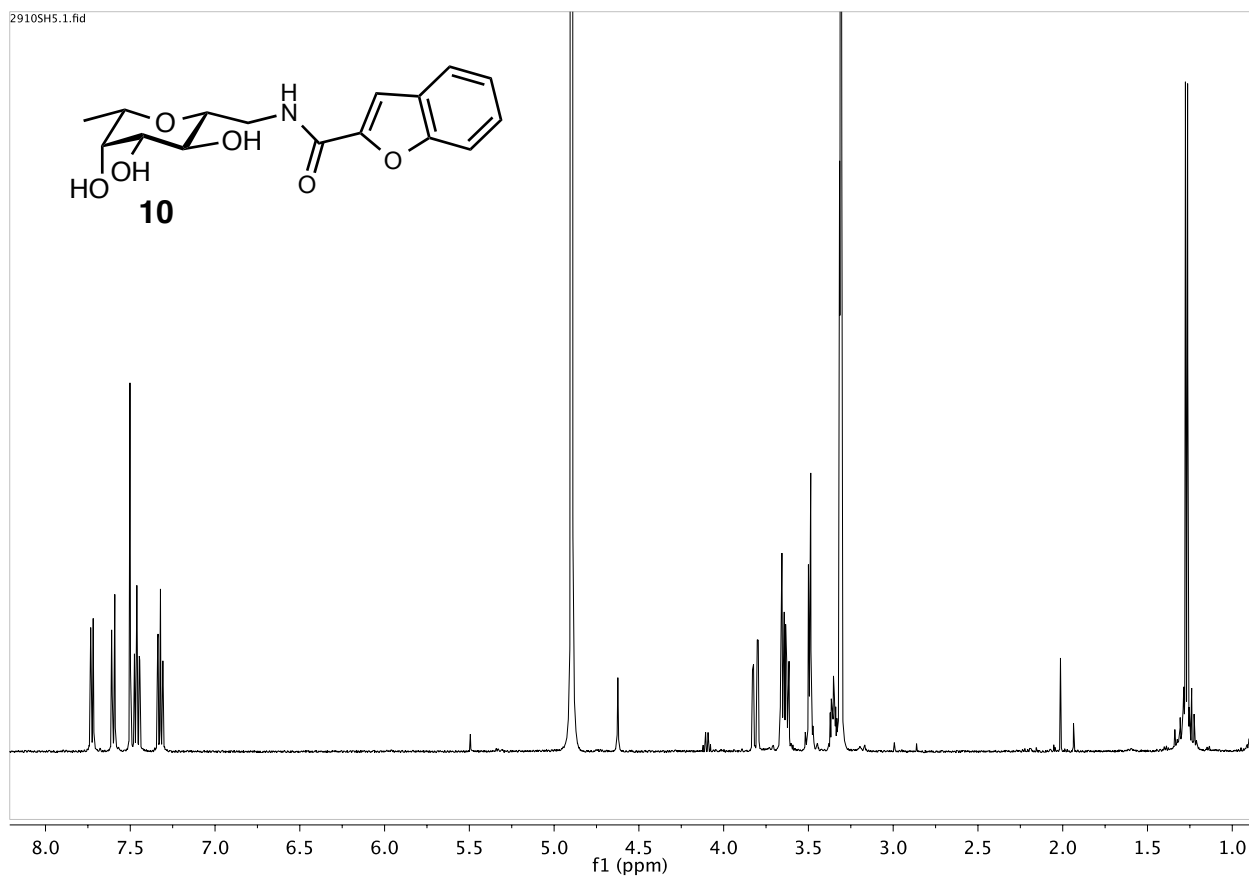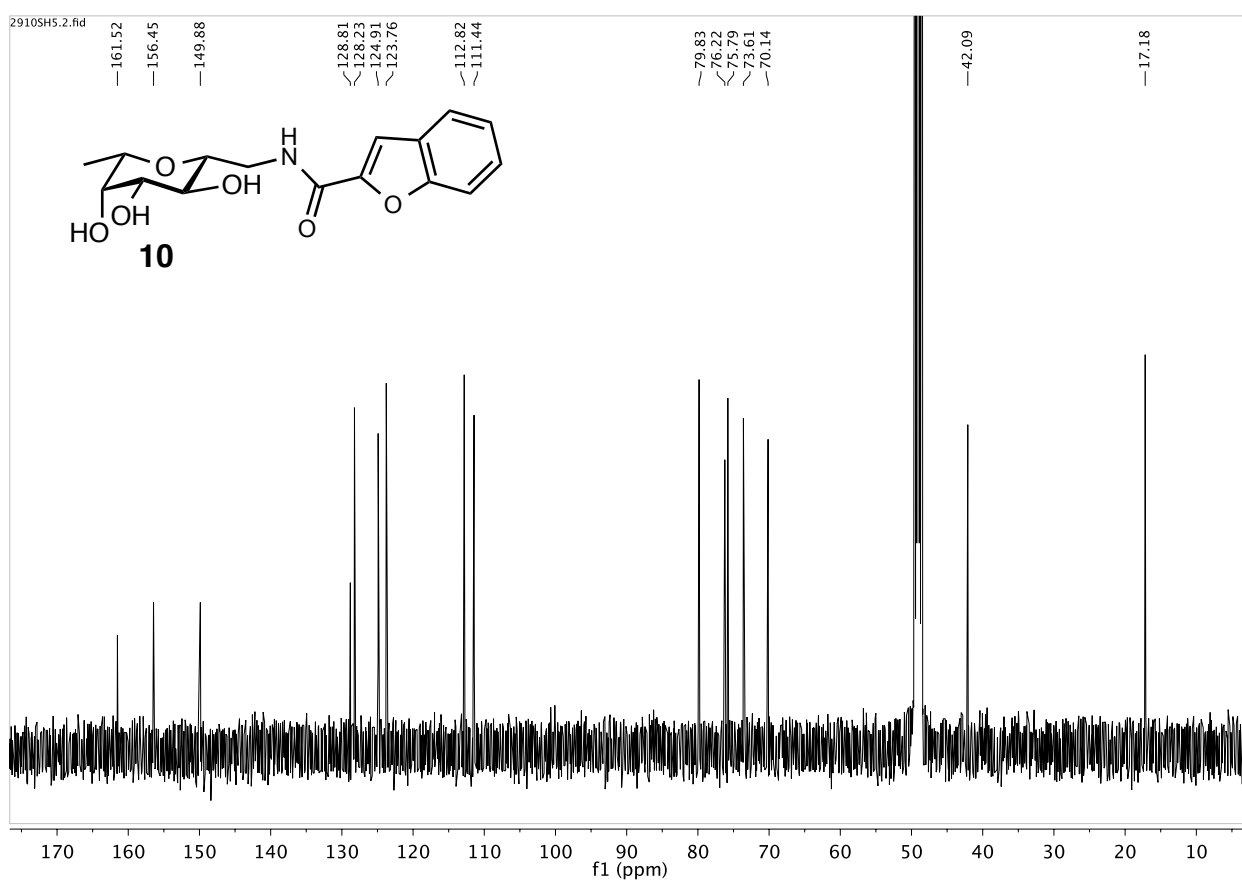

# $^1\text{H}$ , $^{13}\text{C}$ and $^{19}\text{F}$ spectra of new compounds

2110DH255bfr.1.1.fid

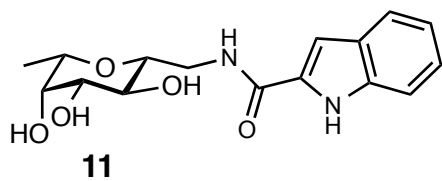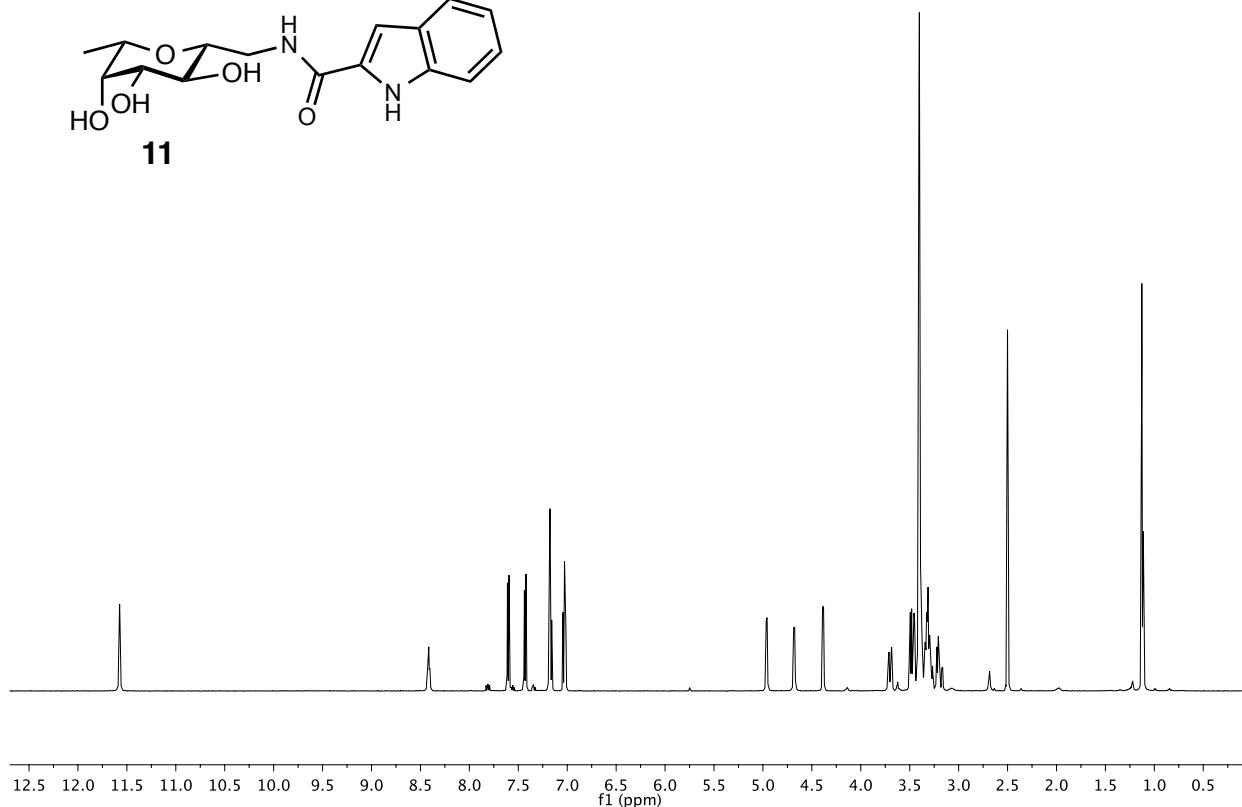

2502dh255fr1.2.fid

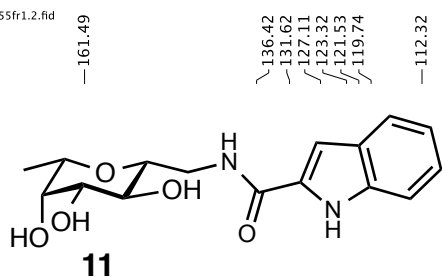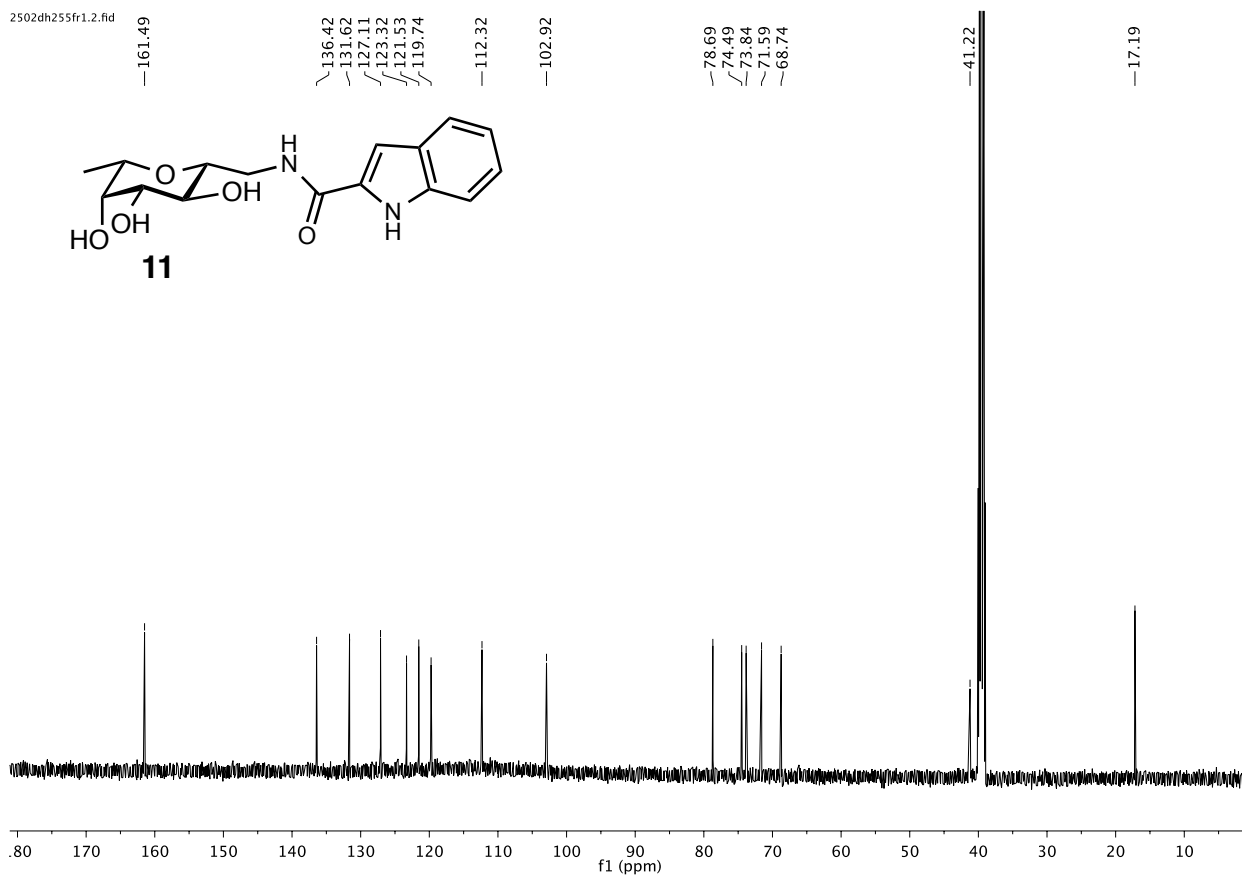

$^1\text{H}$ ,  $^{13}\text{C}$  and  $^{19}\text{F}$  spectra of new compounds

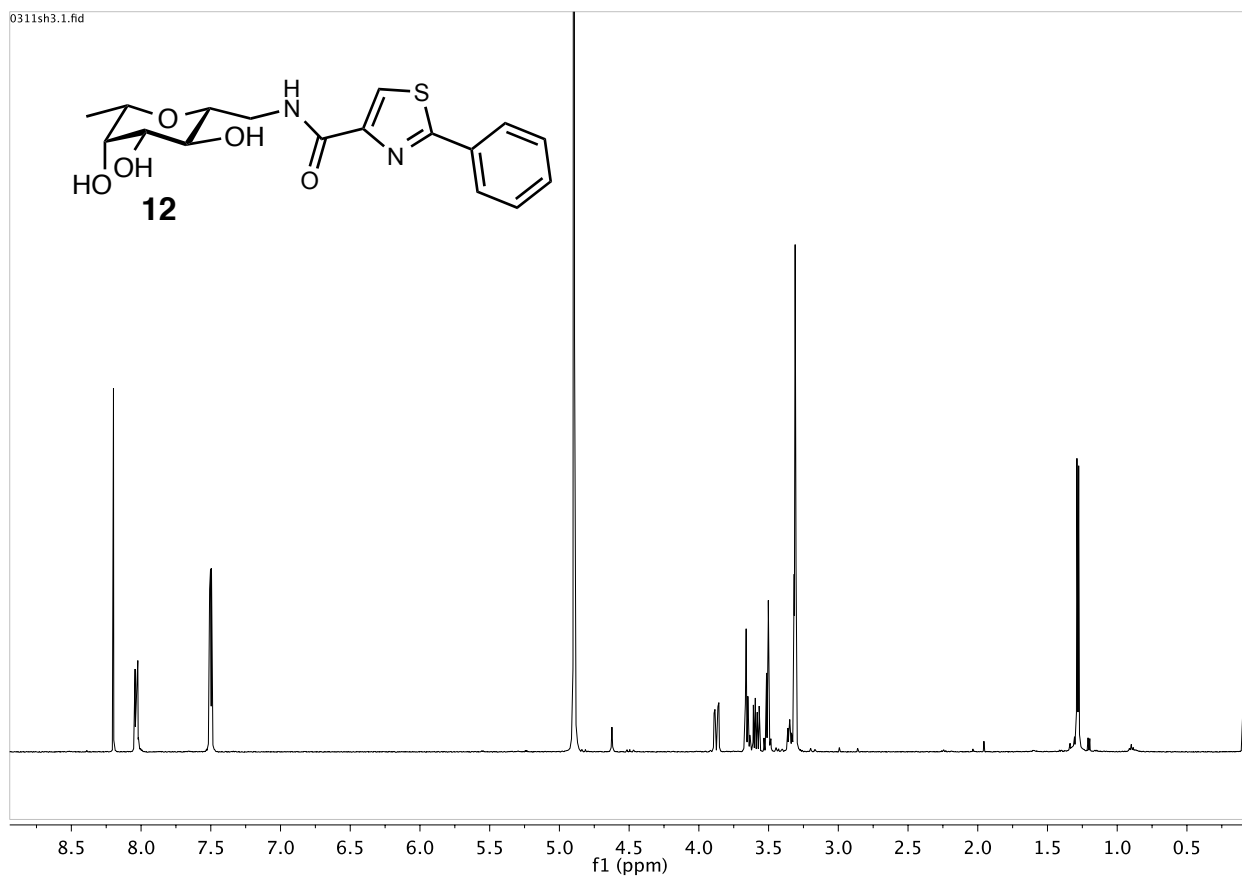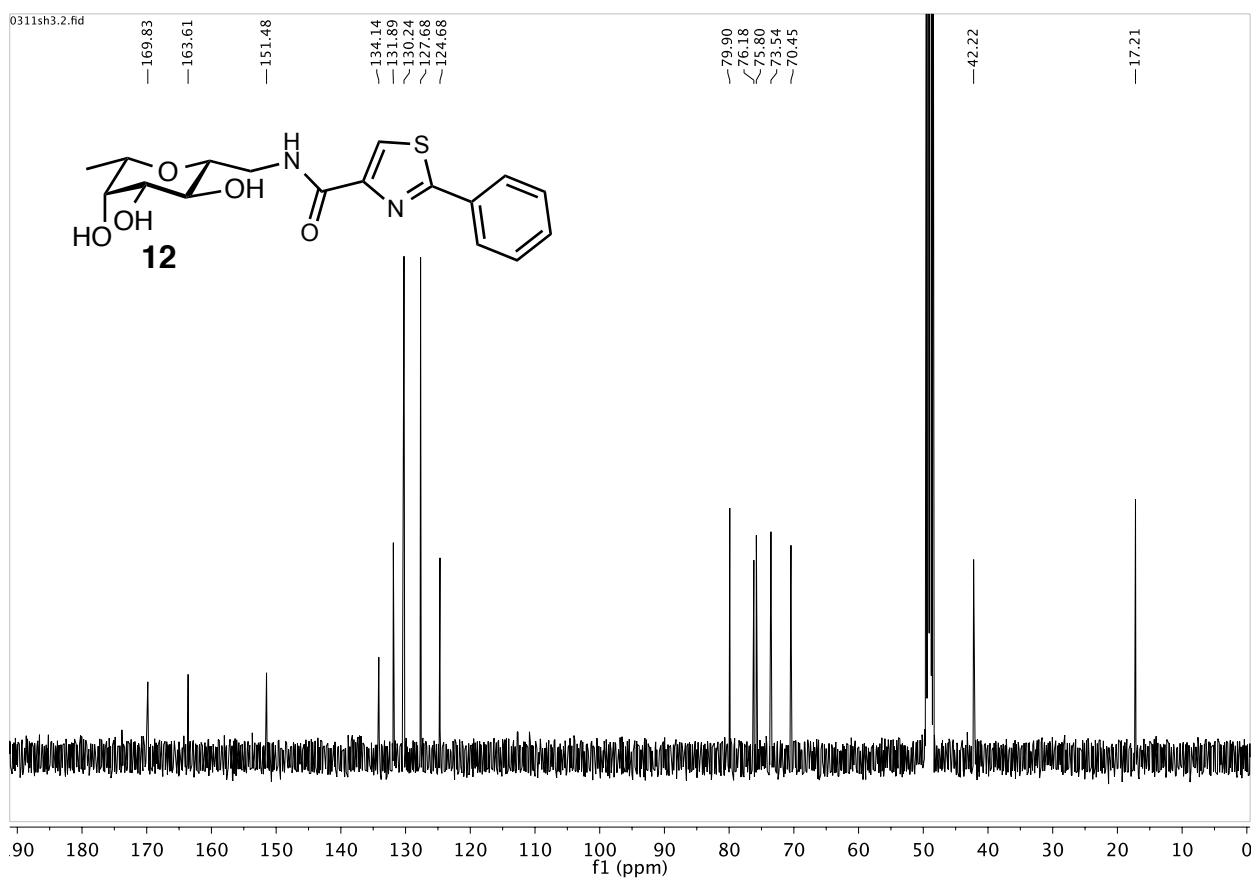

$^1\text{H}$ ,  $^{13}\text{C}$  and  $^{19}\text{F}$  spectra of new compounds

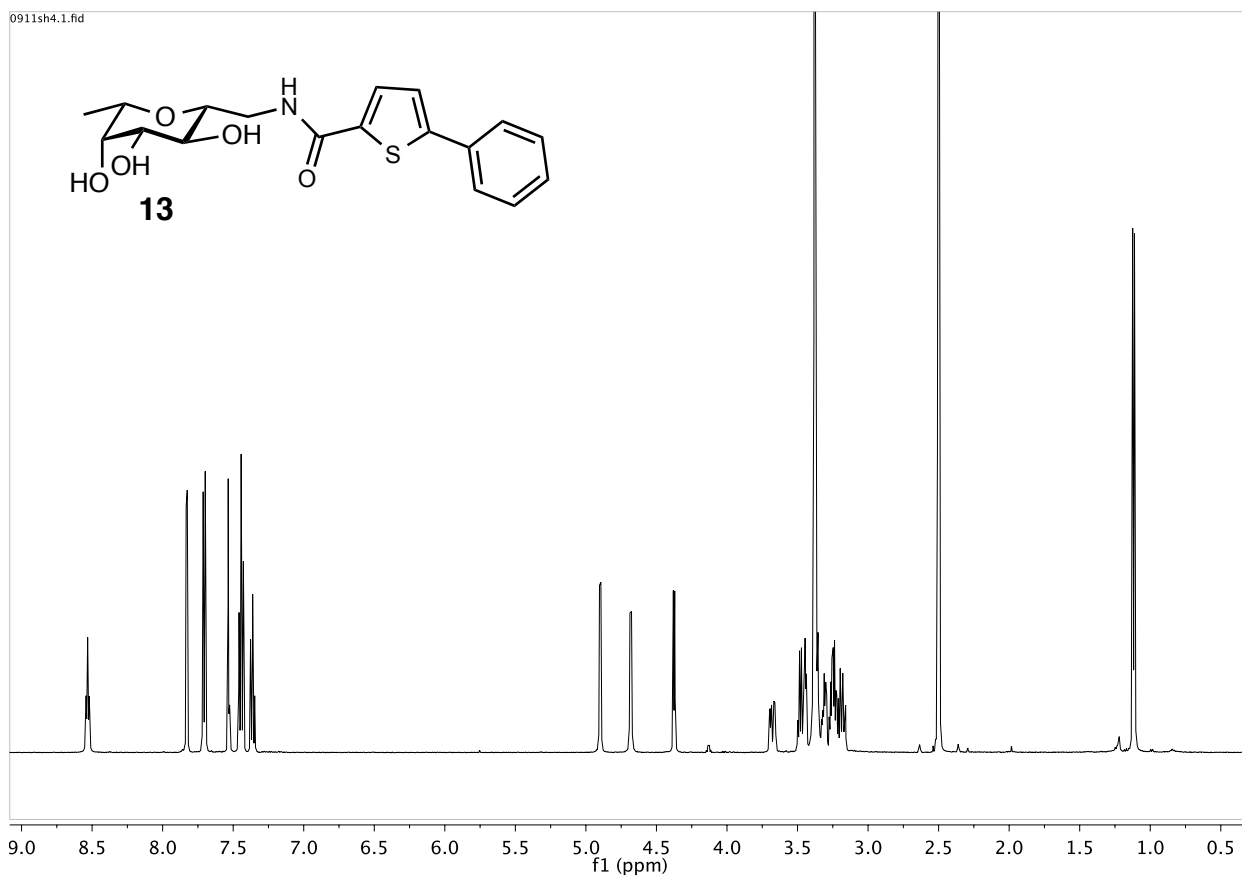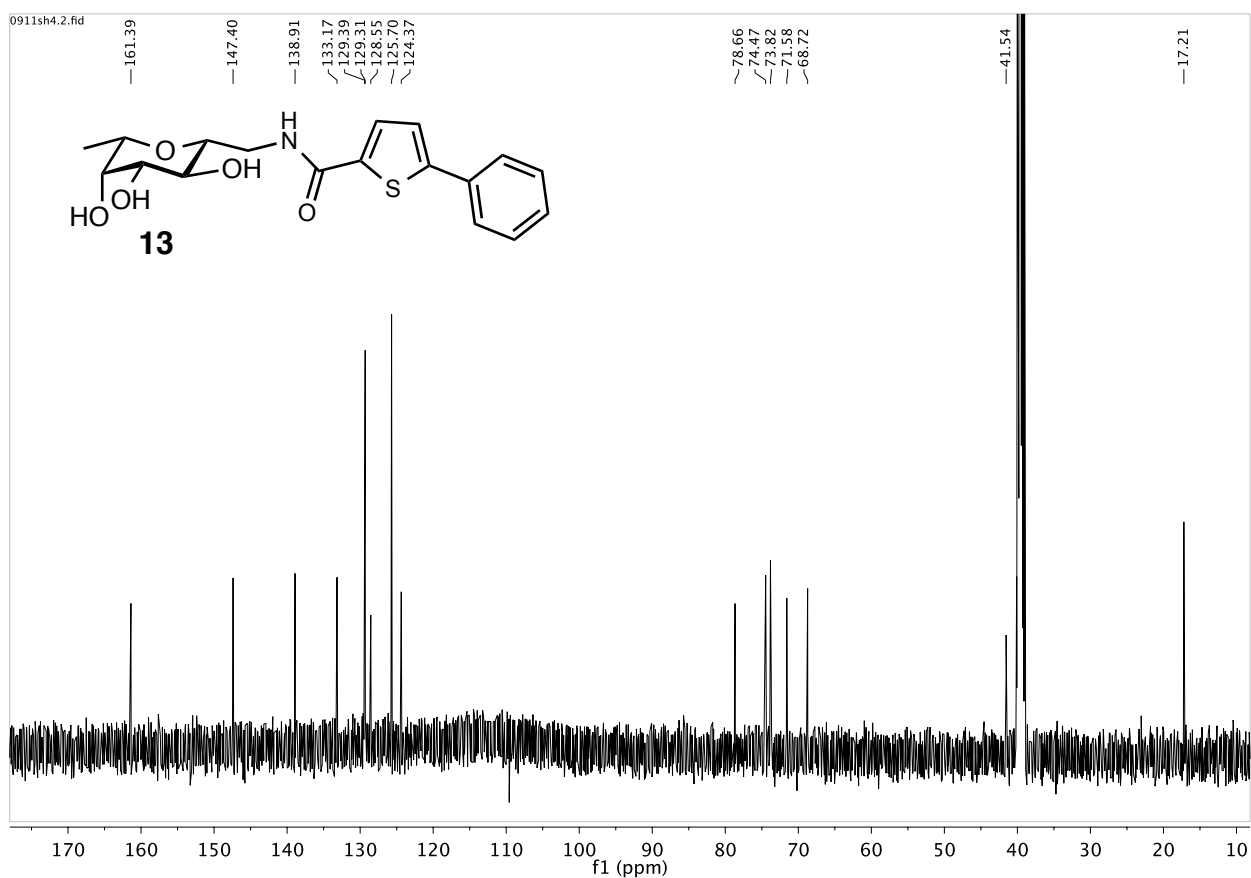



# $^1\text{H}$ , $^{13}\text{C}$ and $^{19}\text{F}$ spectra of new compounds

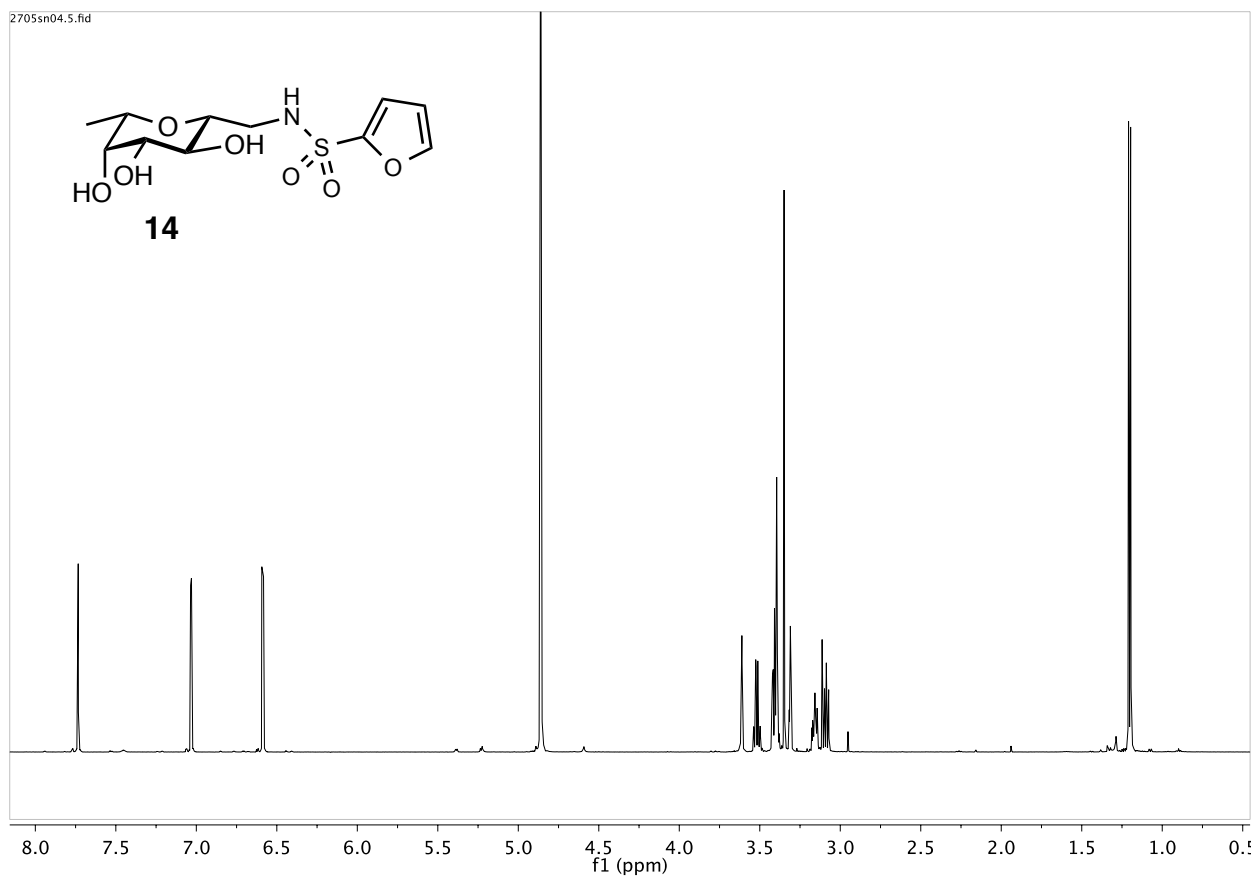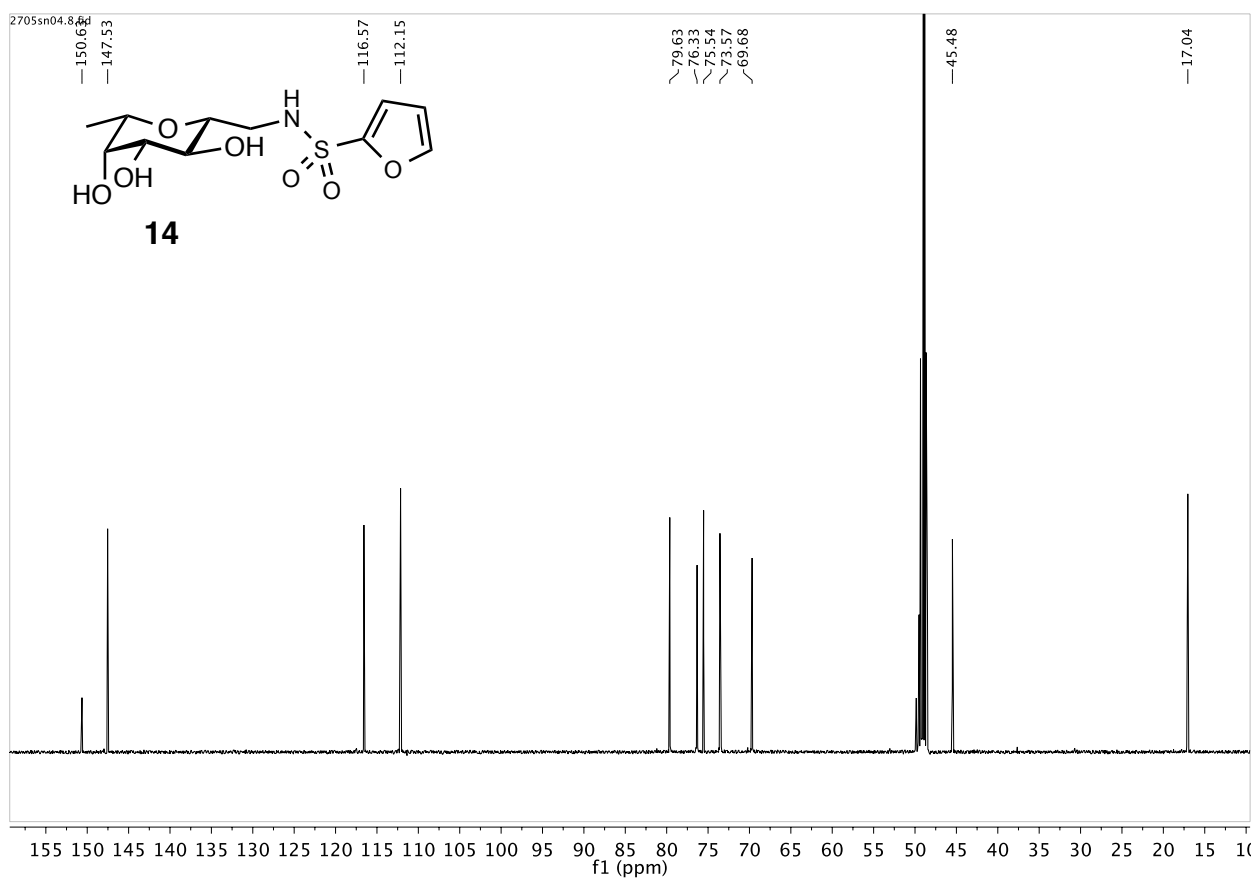

# $^1\text{H}$ , $^{13}\text{C}$ and $^{19}\text{F}$ spectra of new compounds

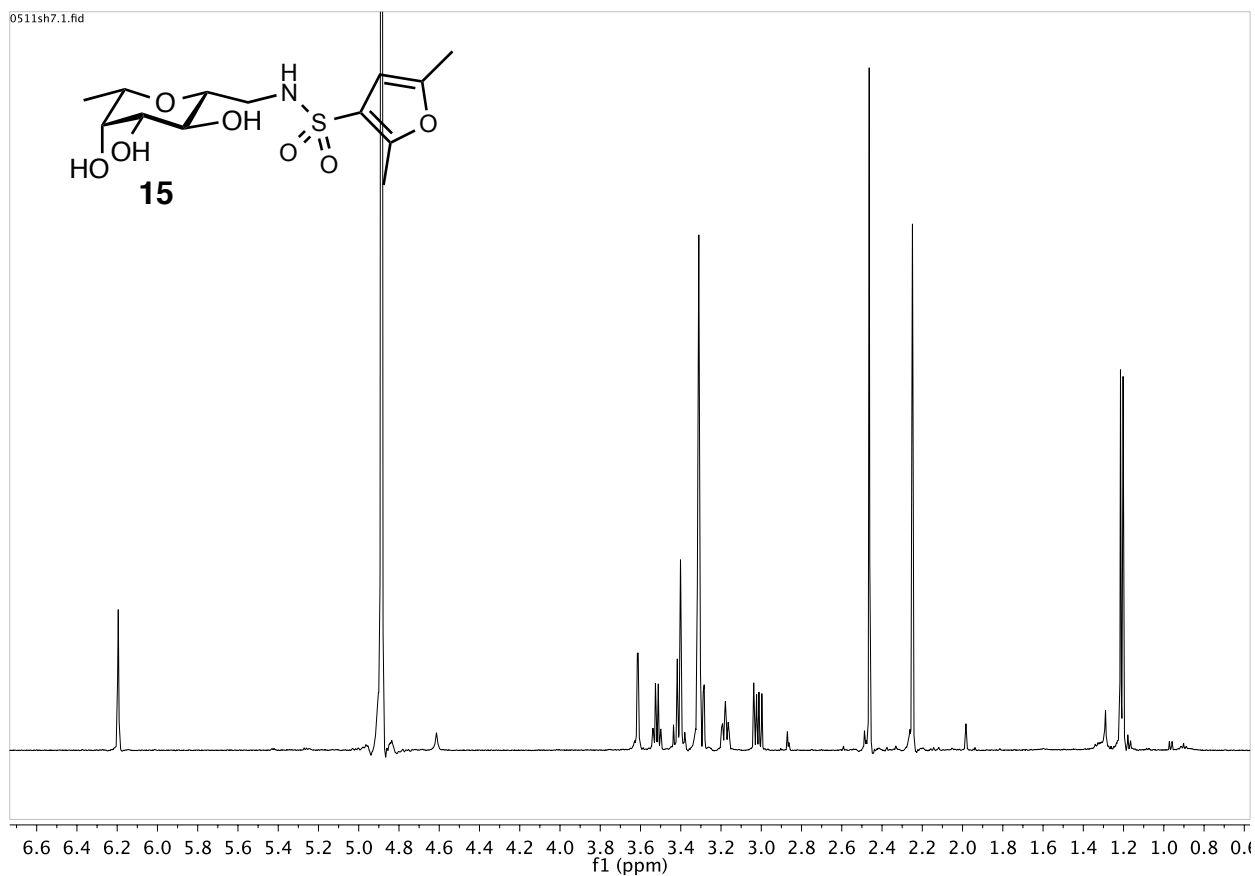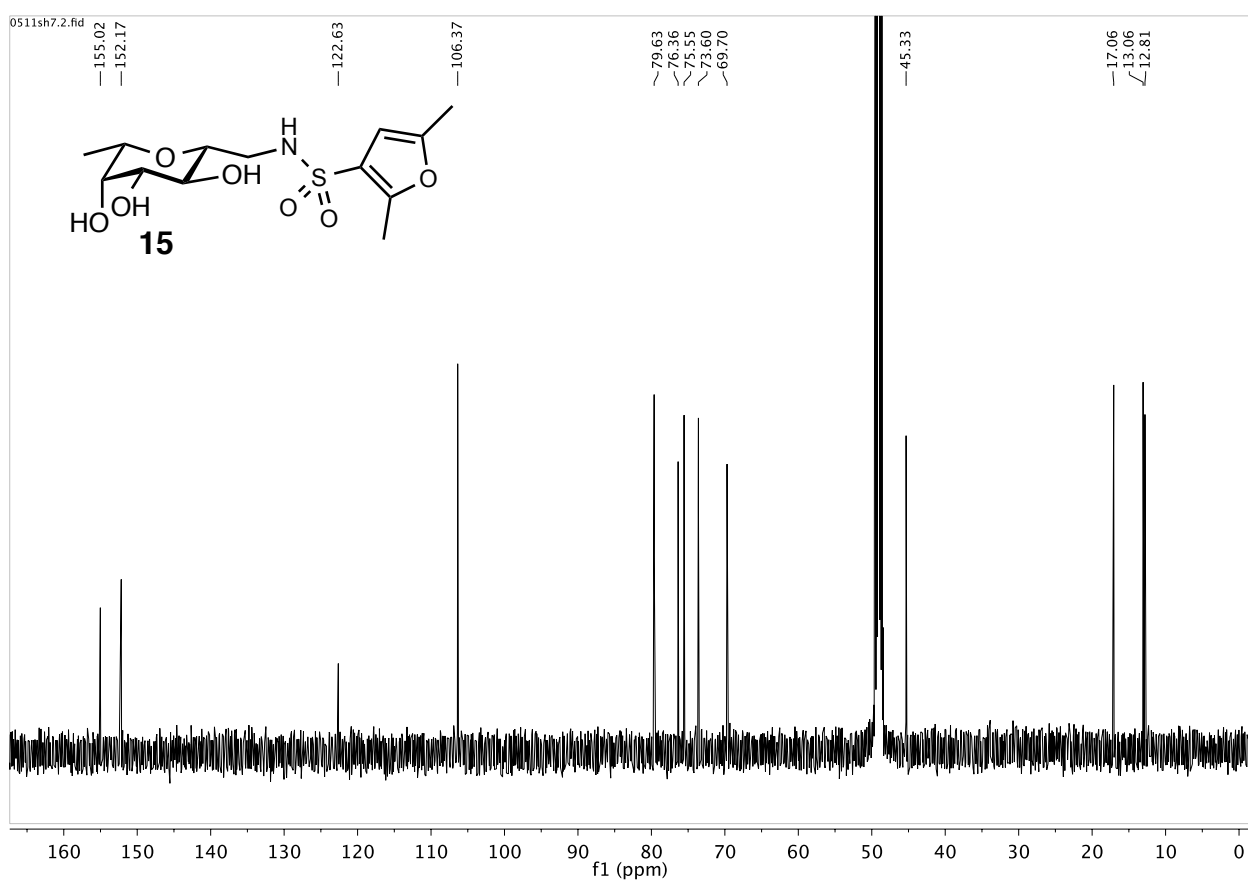

# $^1\text{H}$ , $^{13}\text{C}$ and $^{19}\text{F}$ spectra of new compounds

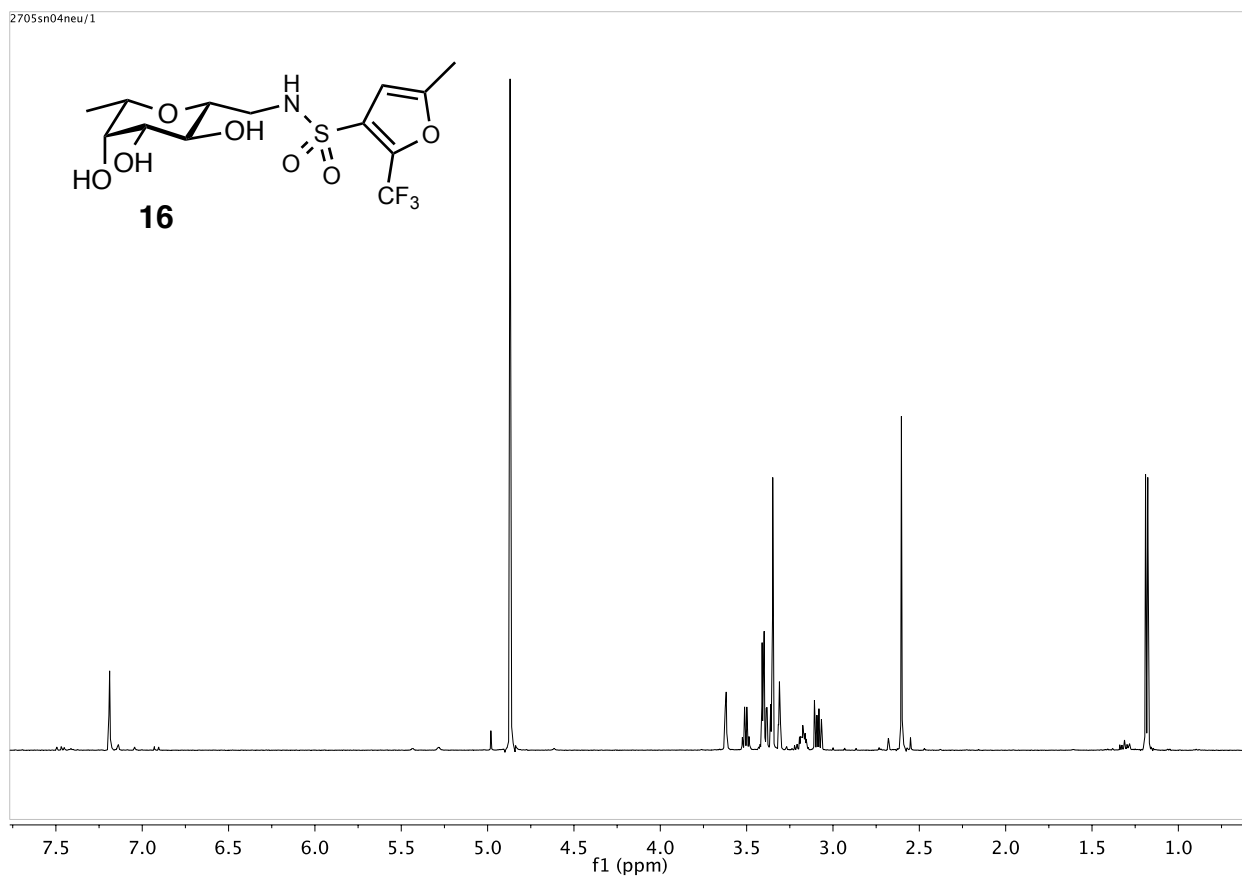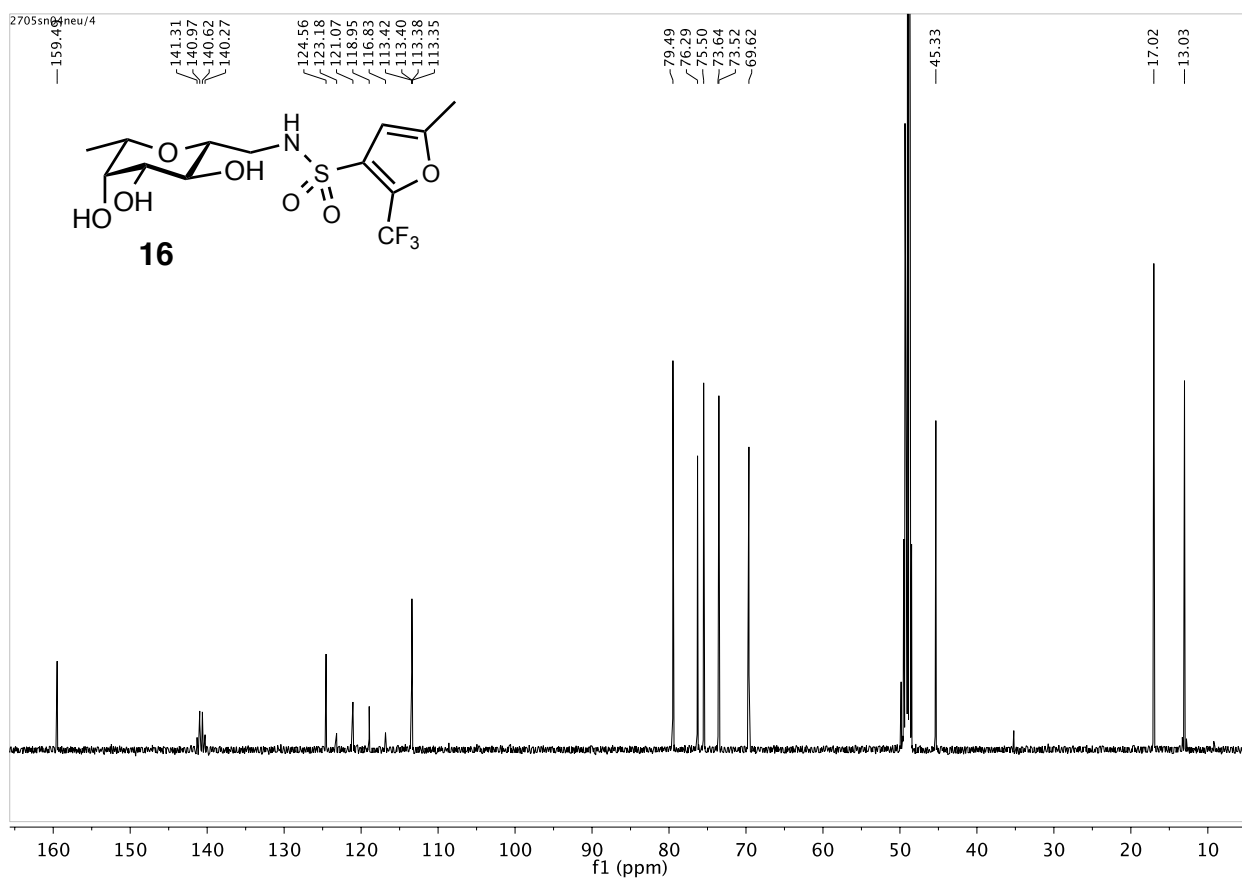

$^1\text{H}$ ,  $^{13}\text{C}$  and  $^{19}\text{F}$  spectra of new compounds

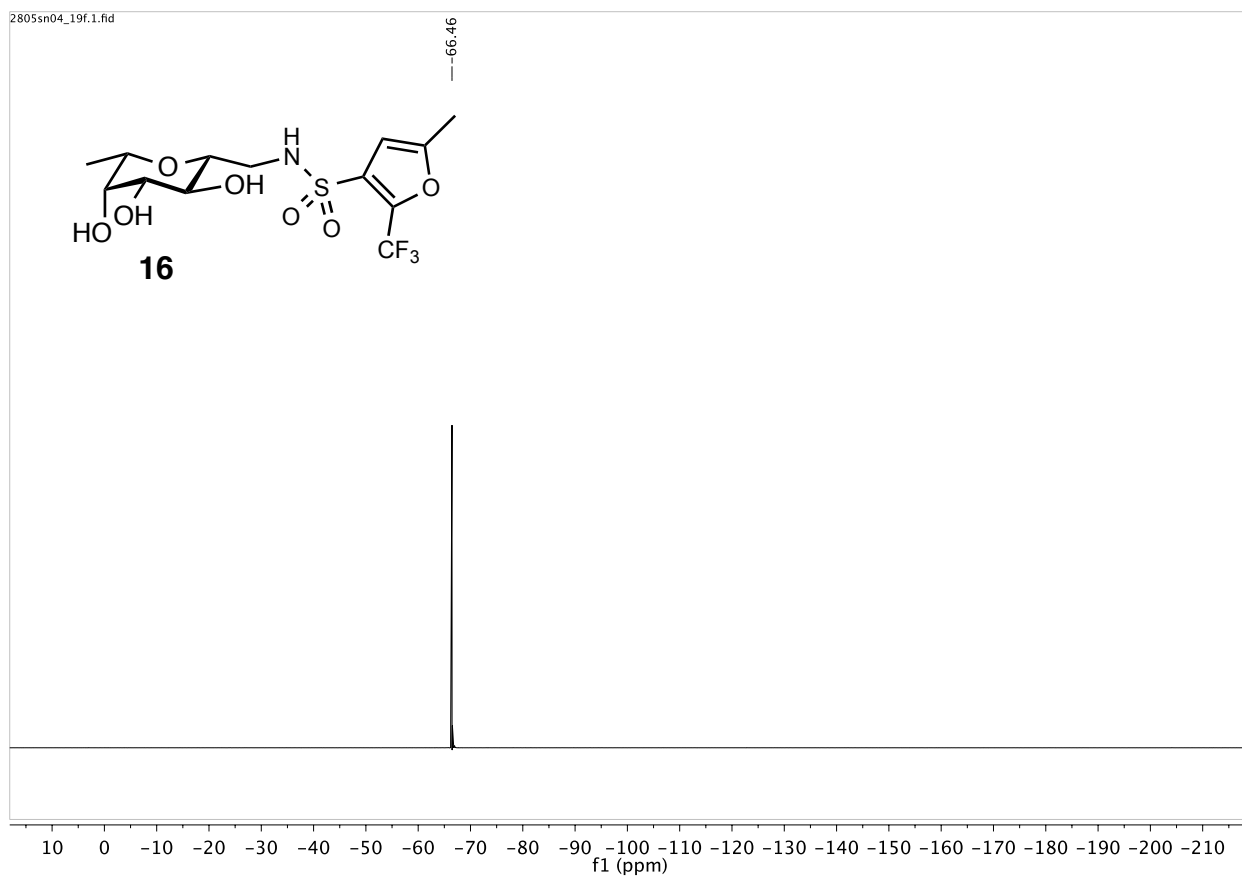

$^1\text{H}$ ,  $^{13}\text{C}$  and  $^{19}\text{F}$  spectra of new compounds

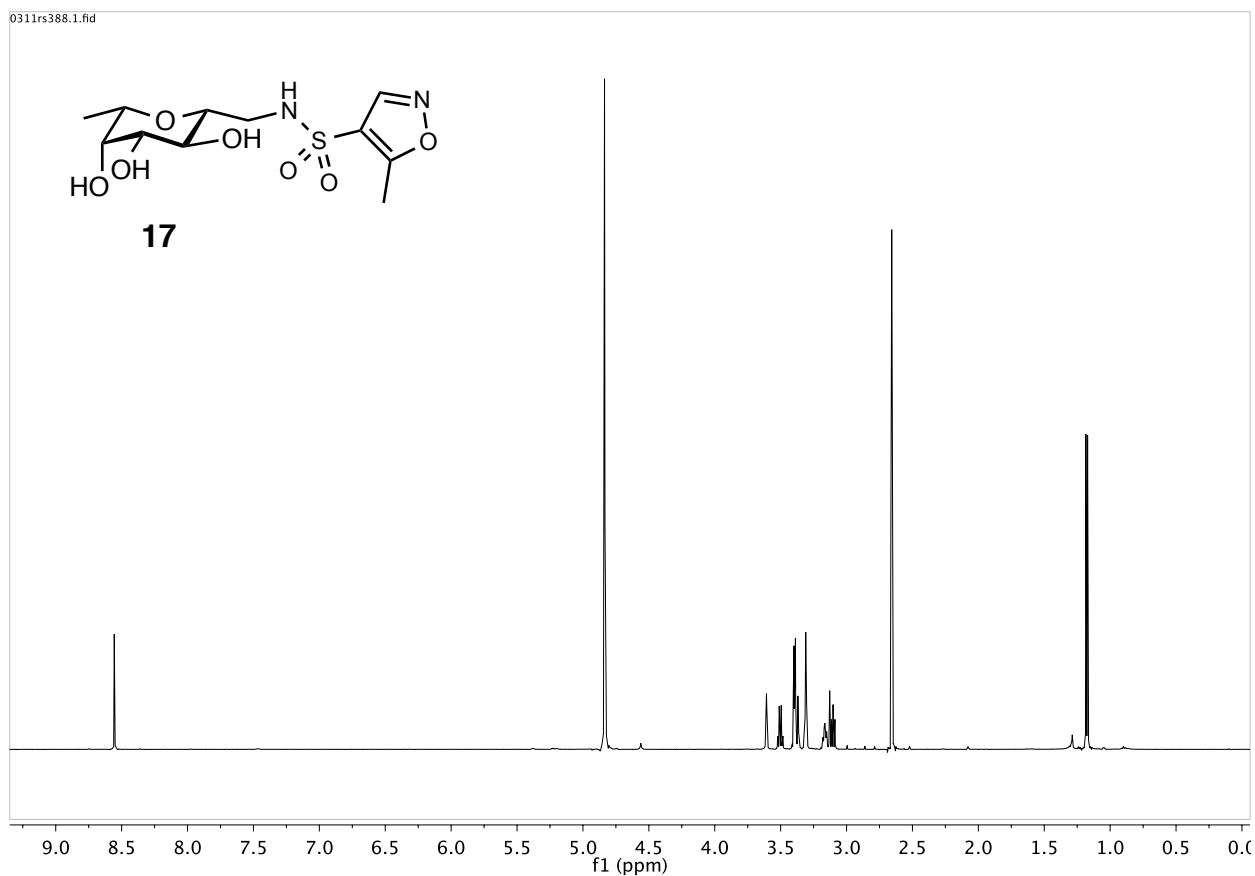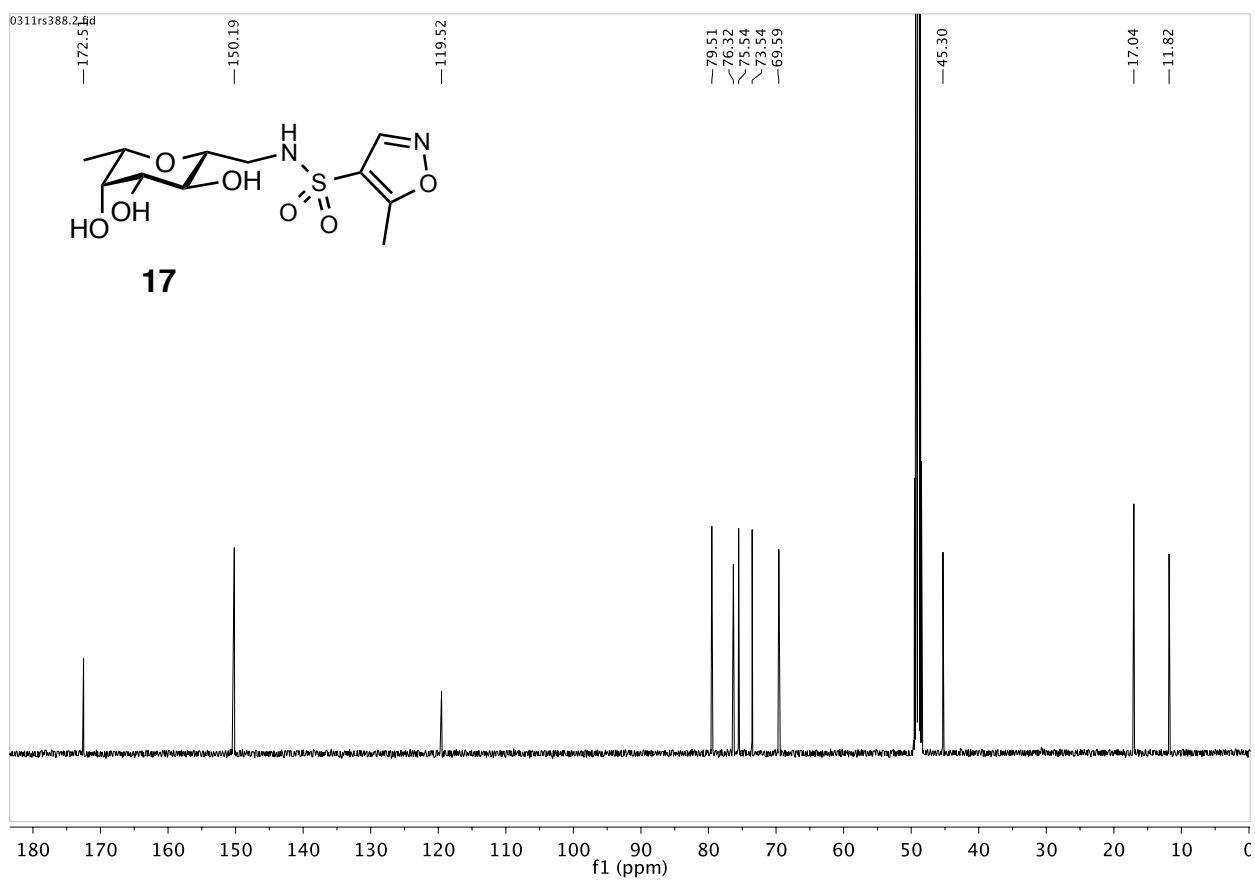

# $^1\text{H}$ , $^{13}\text{C}$ and $^{19}\text{F}$ spectra of new compounds

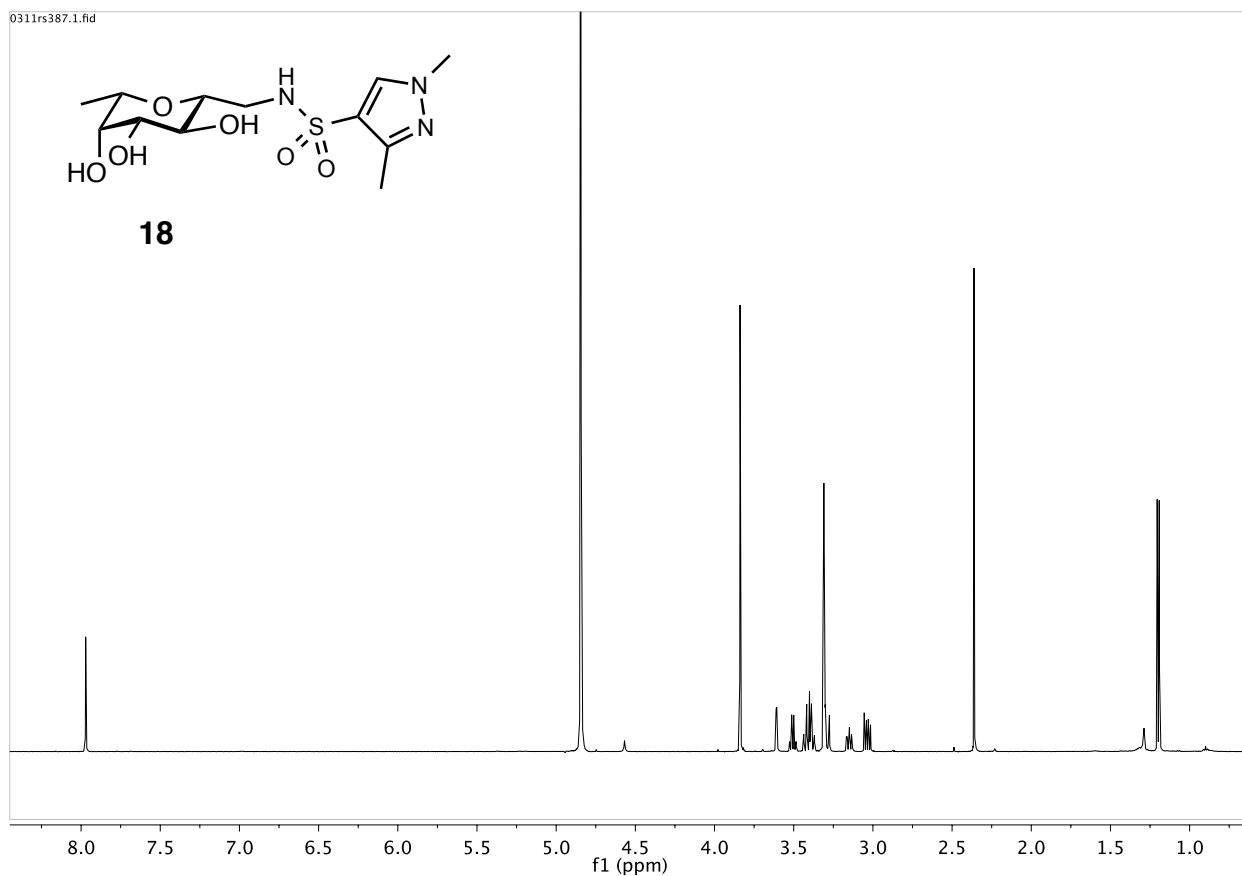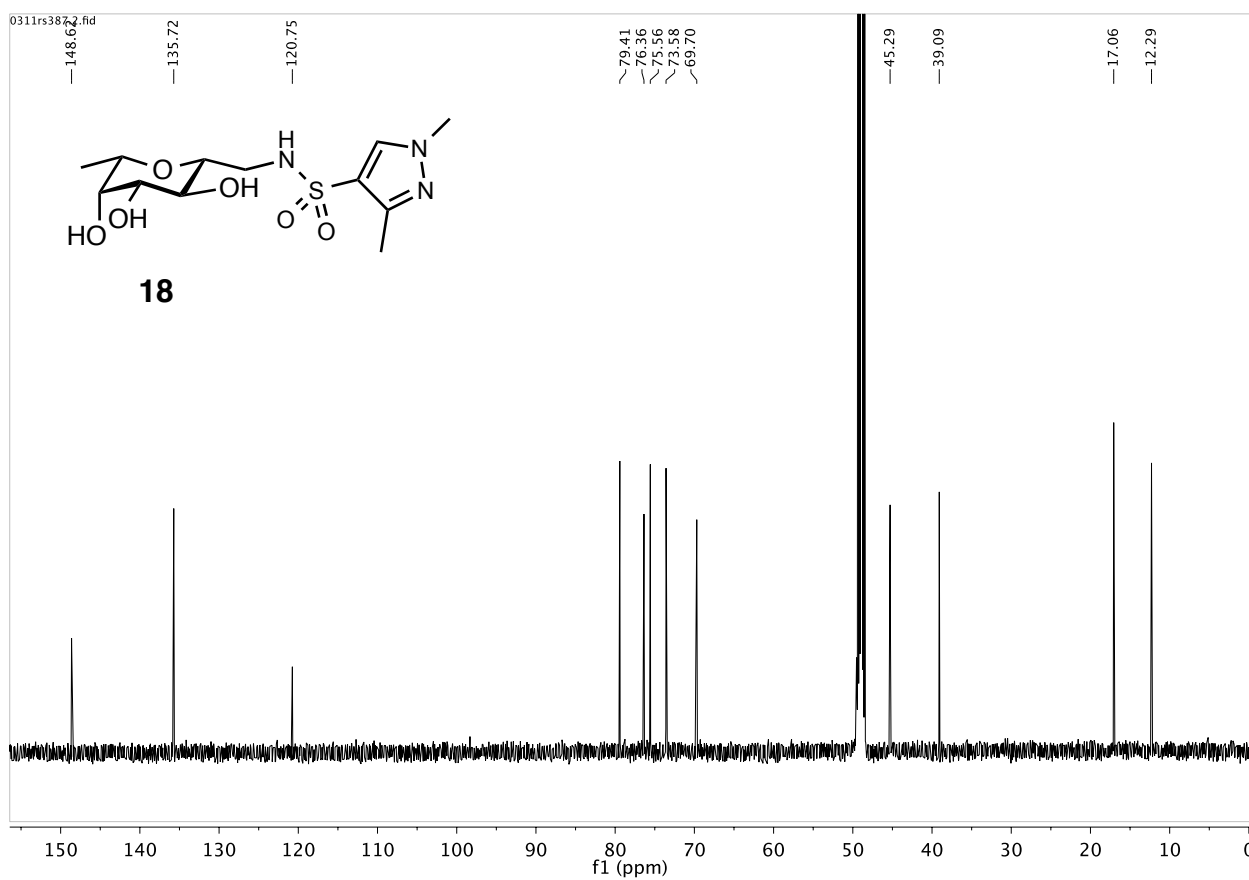

$^1\text{H}$ ,  $^{13}\text{C}$  and  $^{19}\text{F}$  spectra of new compounds

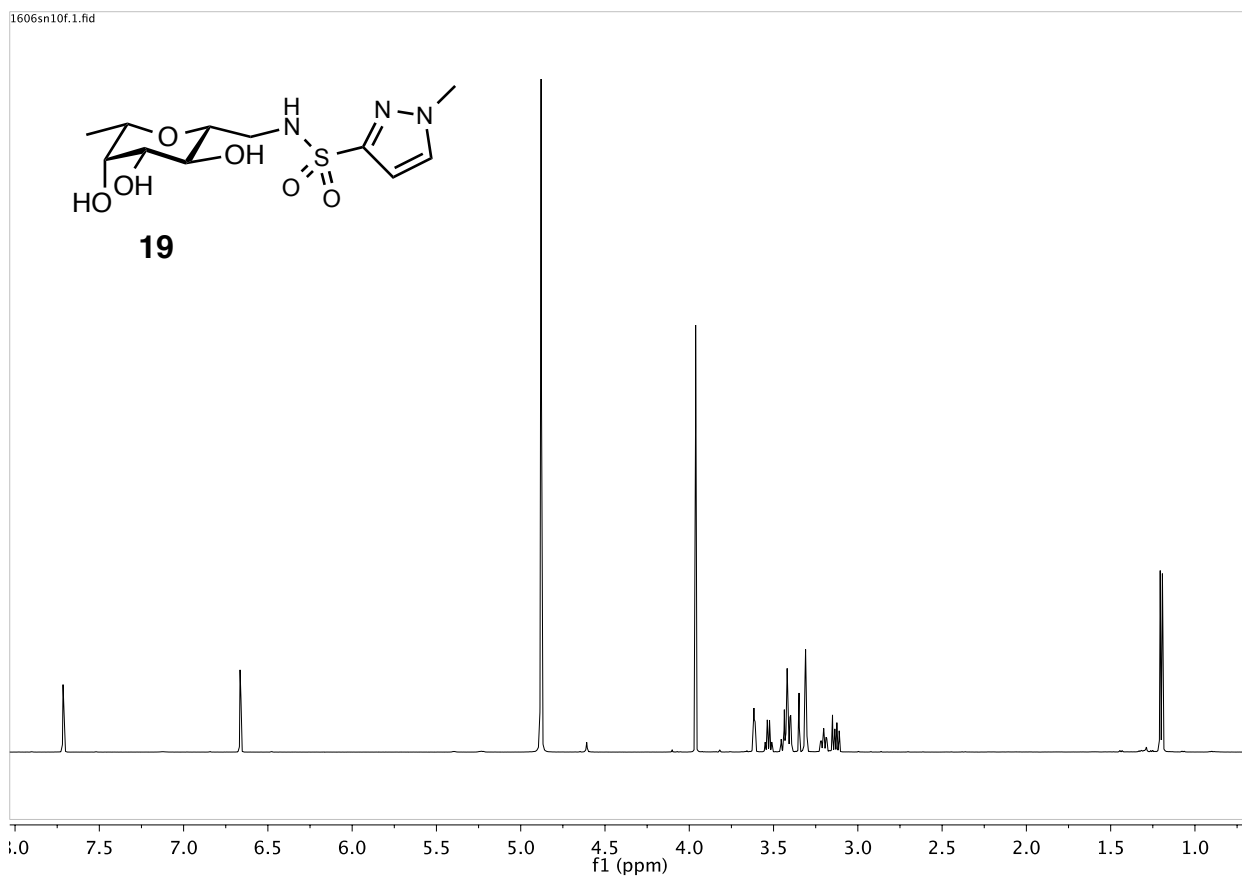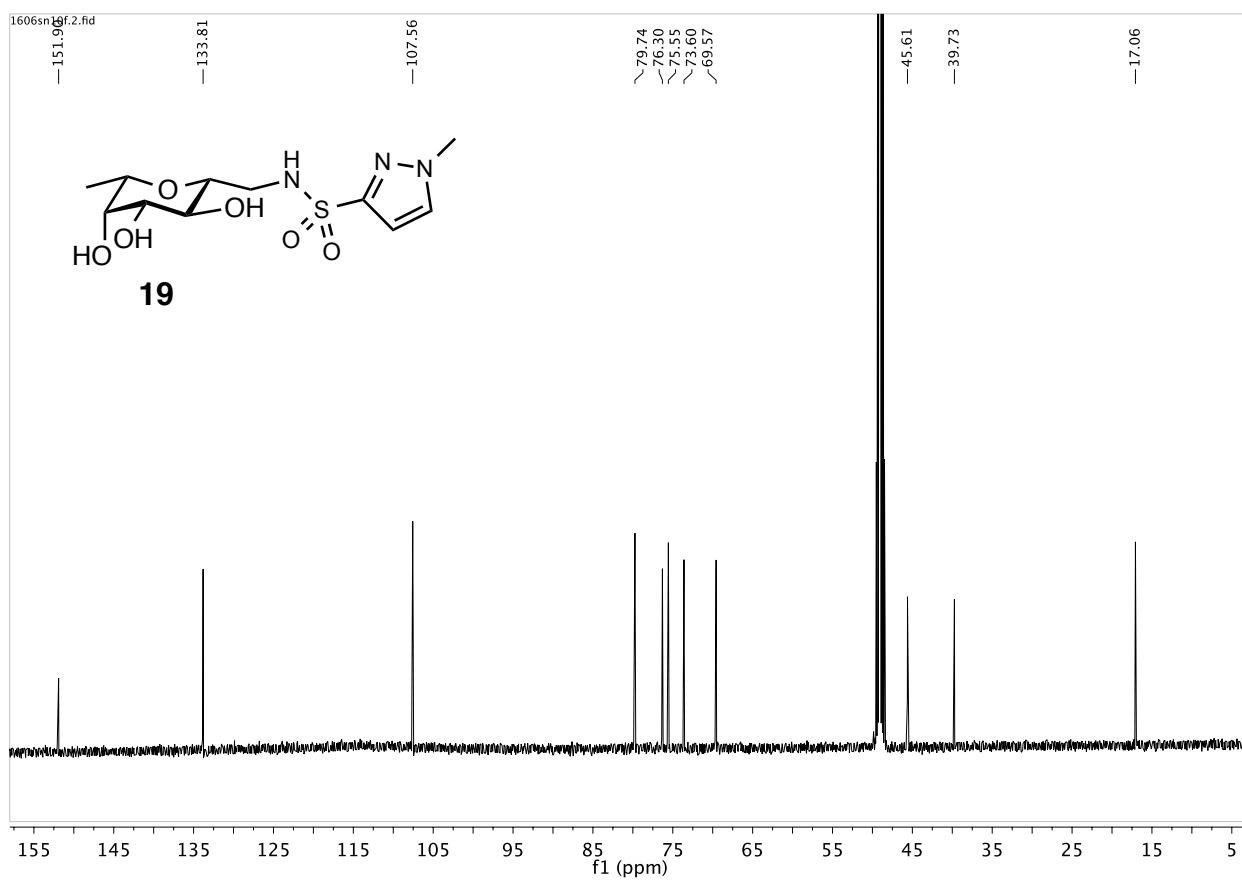

$^1\text{H}$ ,  $^{13}\text{C}$  and  $^{19}\text{F}$  spectra of new compounds

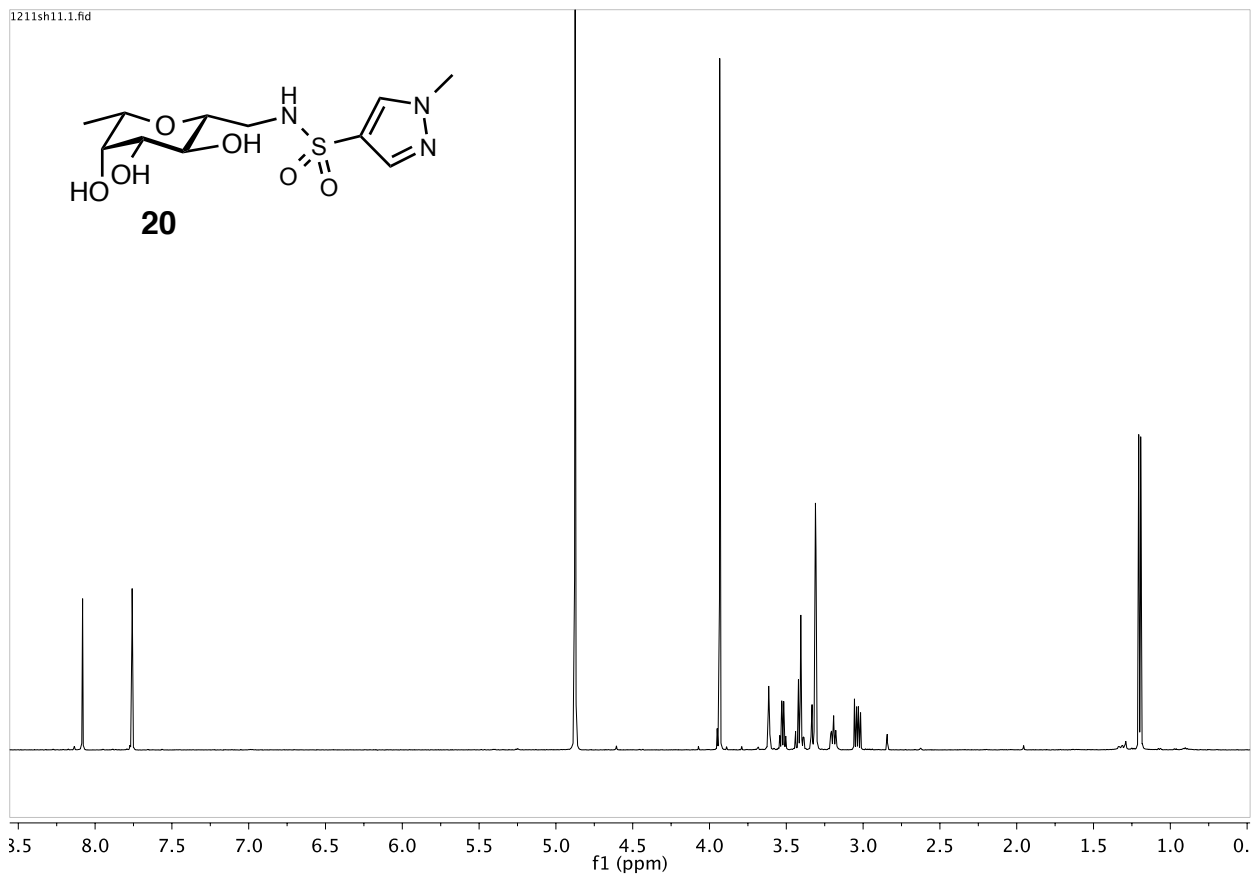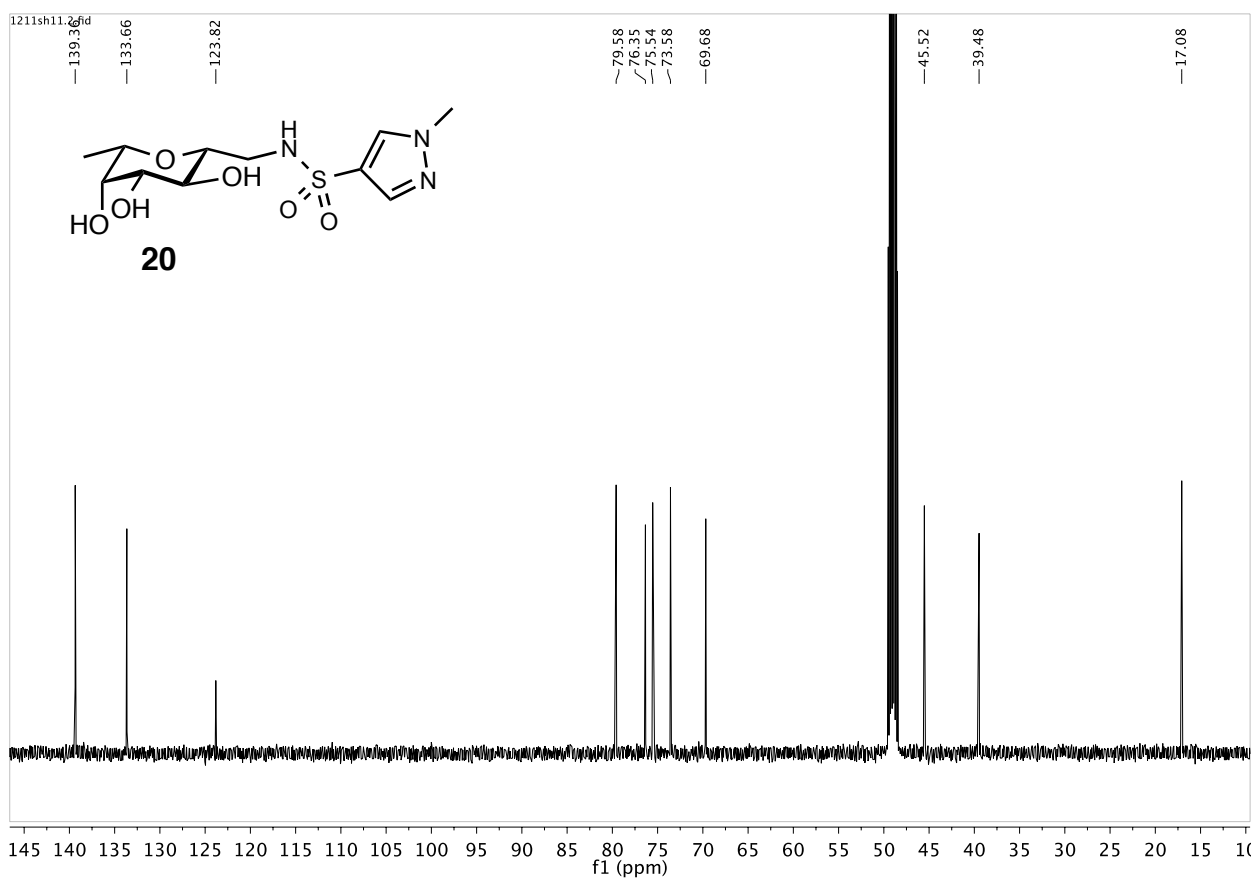



$^1\text{H}$ ,  $^{13}\text{C}$  and  $^{19}\text{F}$  spectra of new compounds

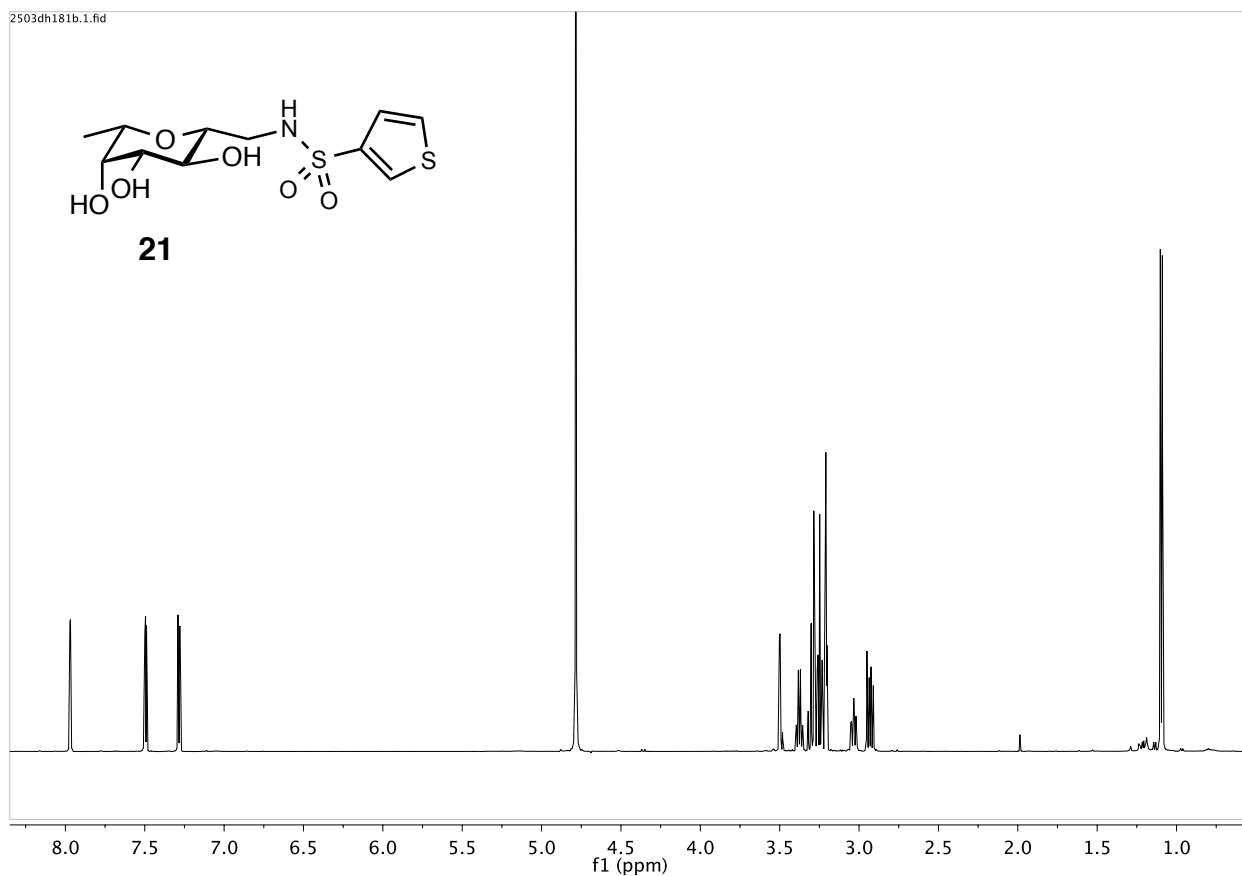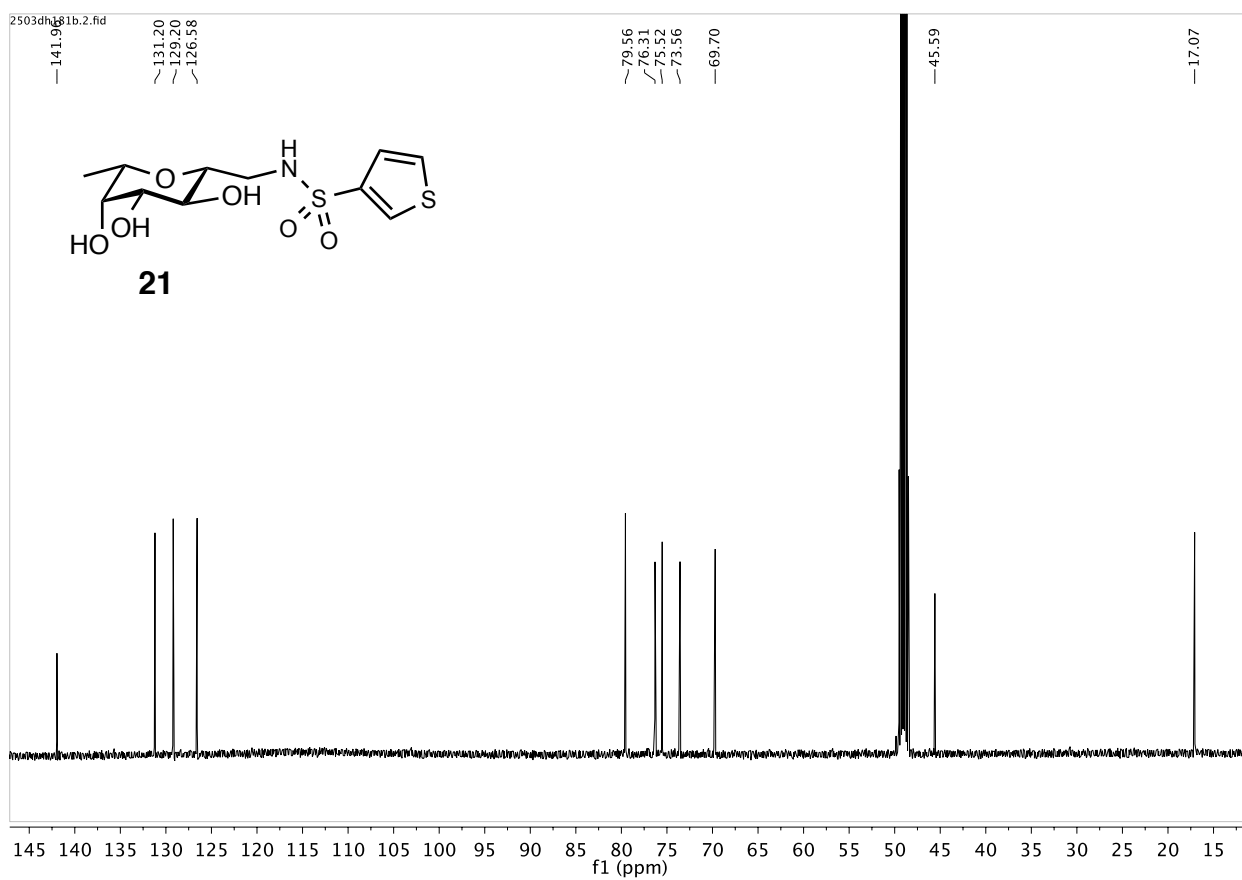

$^1\text{H}$ ,  $^{13}\text{C}$  and  $^{19}\text{F}$  spectra of new compounds

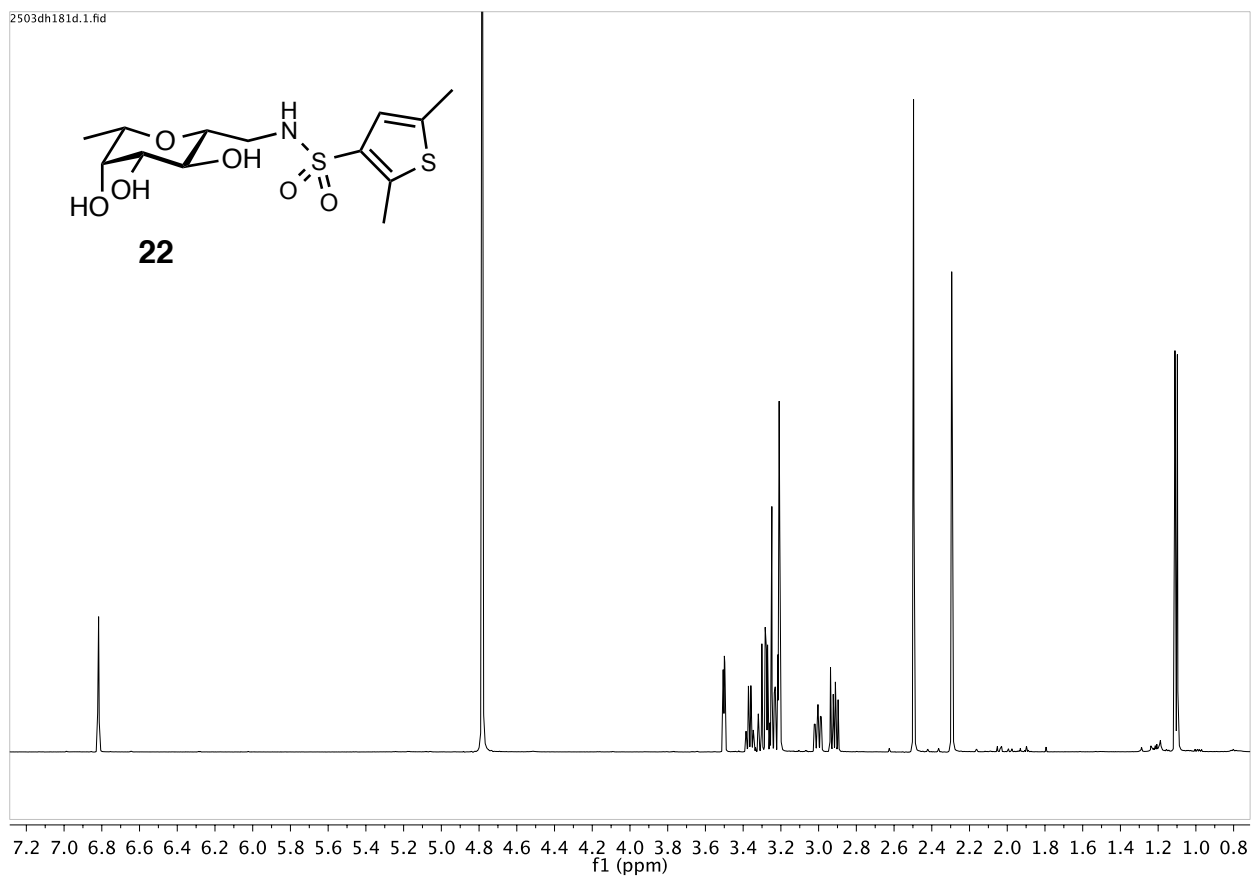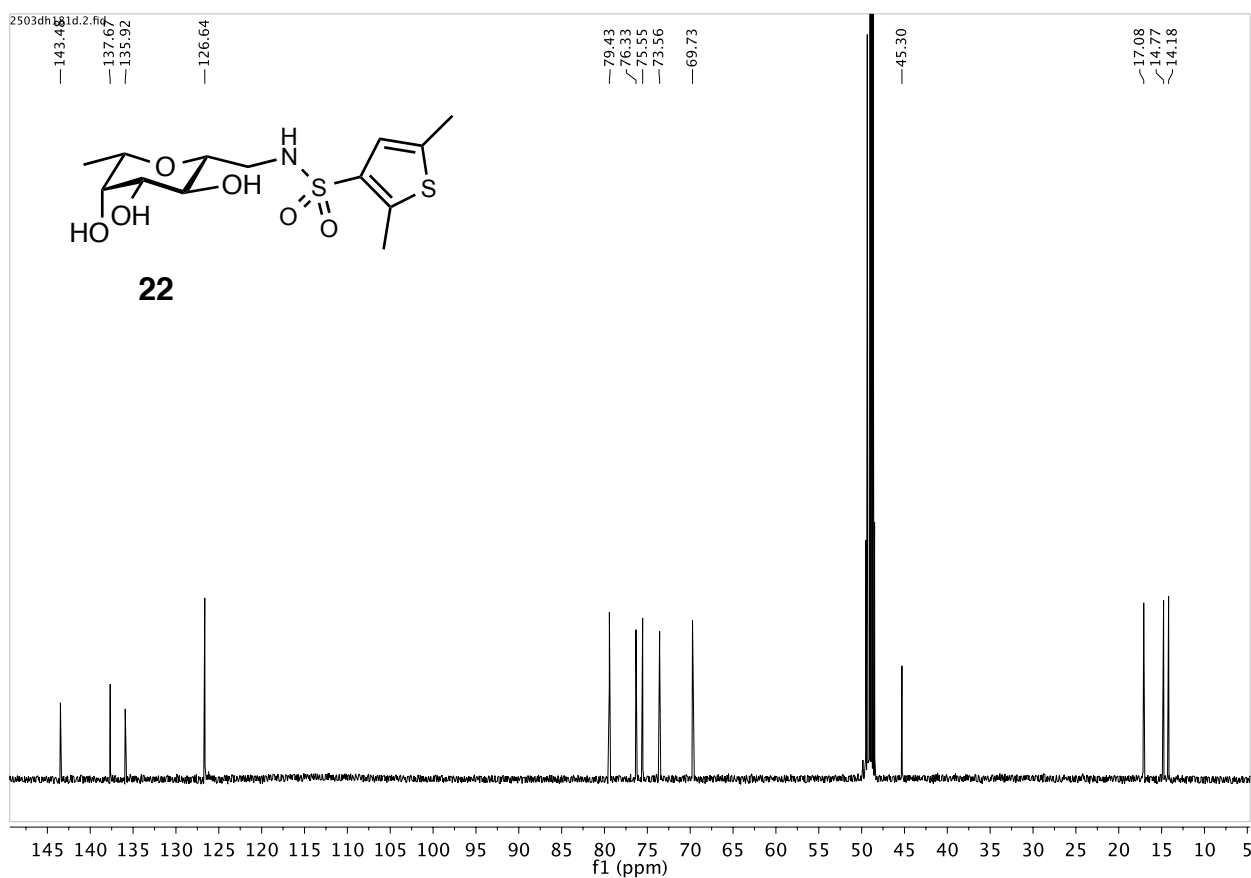

$^1\text{H}$ ,  $^{13}\text{C}$  and  $^{19}\text{F}$  spectra of new compounds

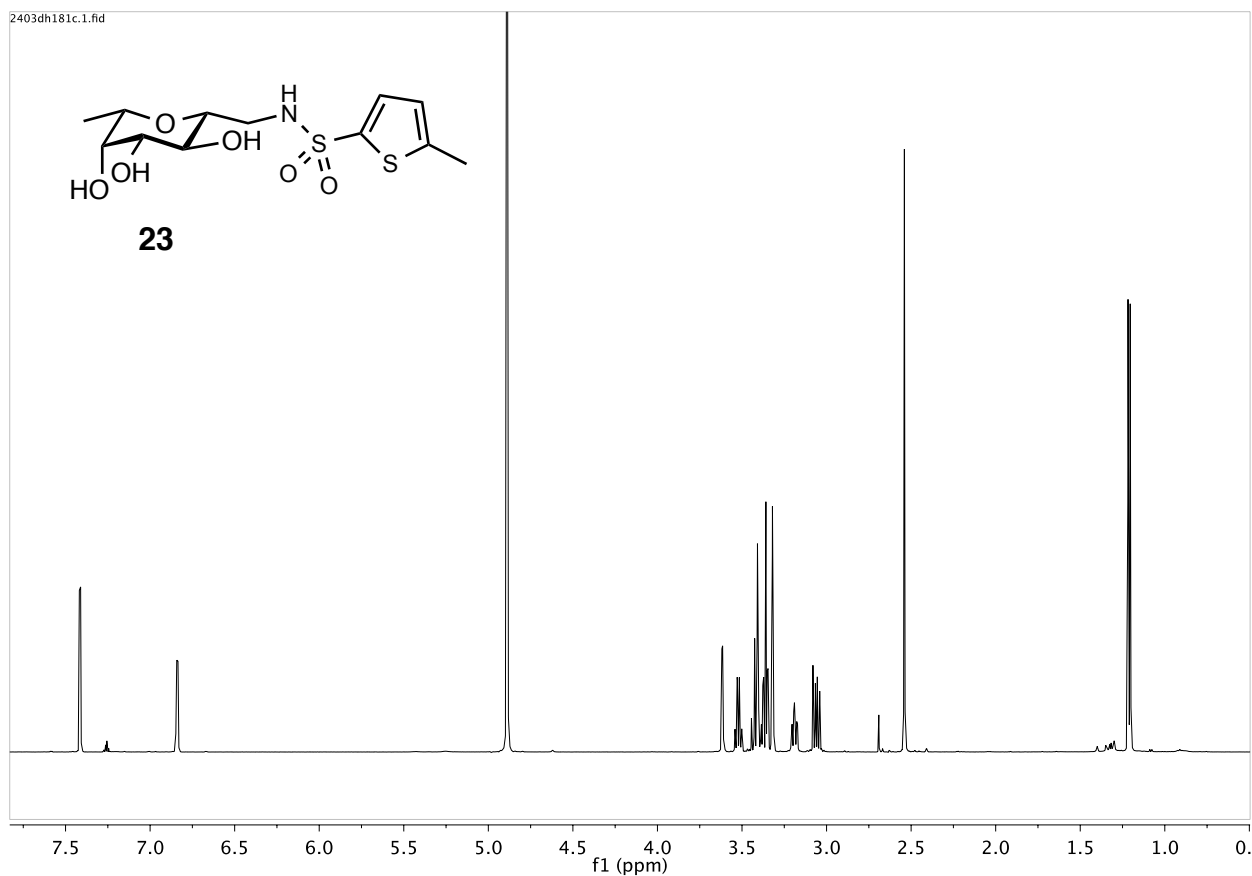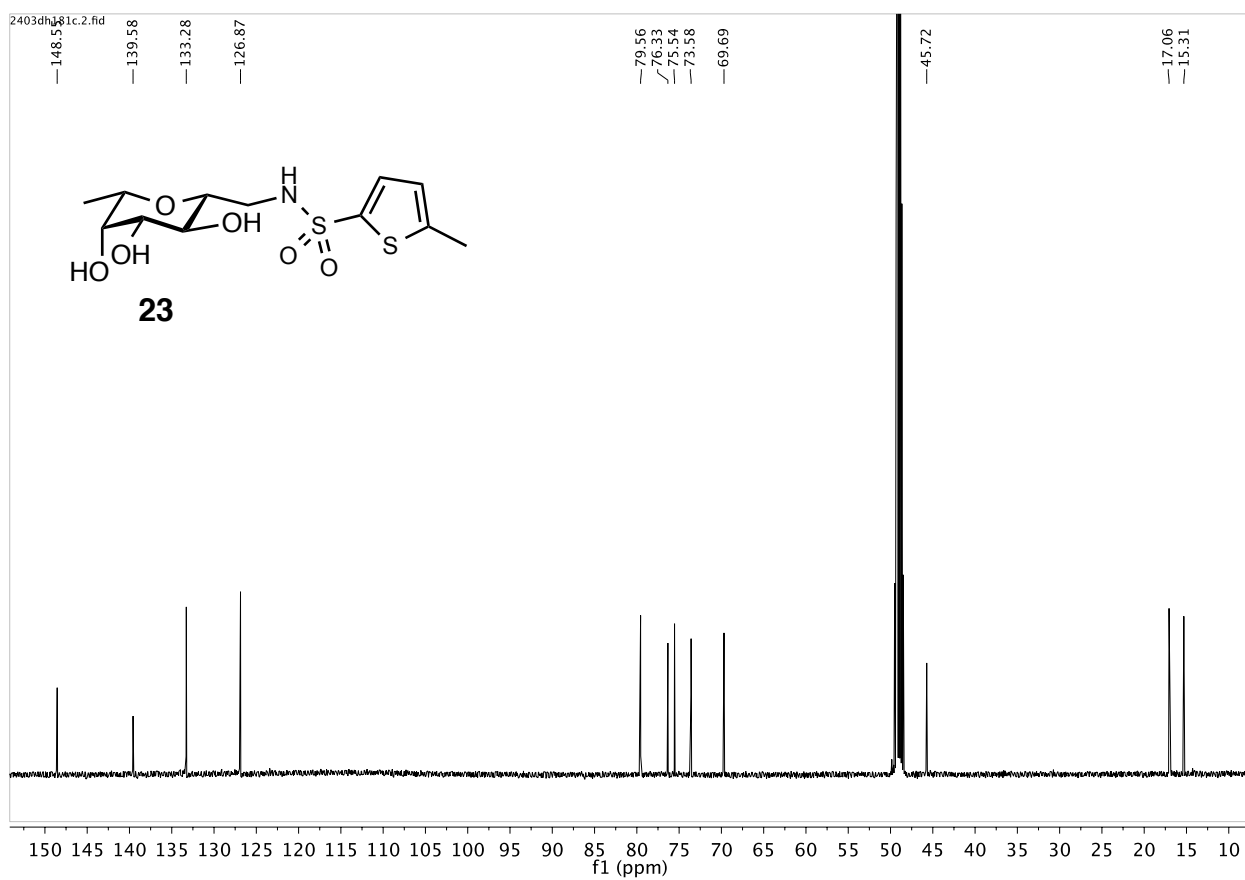

# $^1\text{H}$ , $^{13}\text{C}$ and $^{19}\text{F}$ spectra of new compounds

3006sn13.1.fid

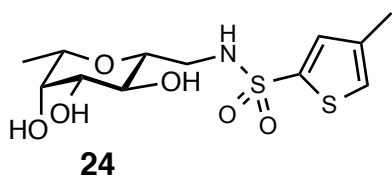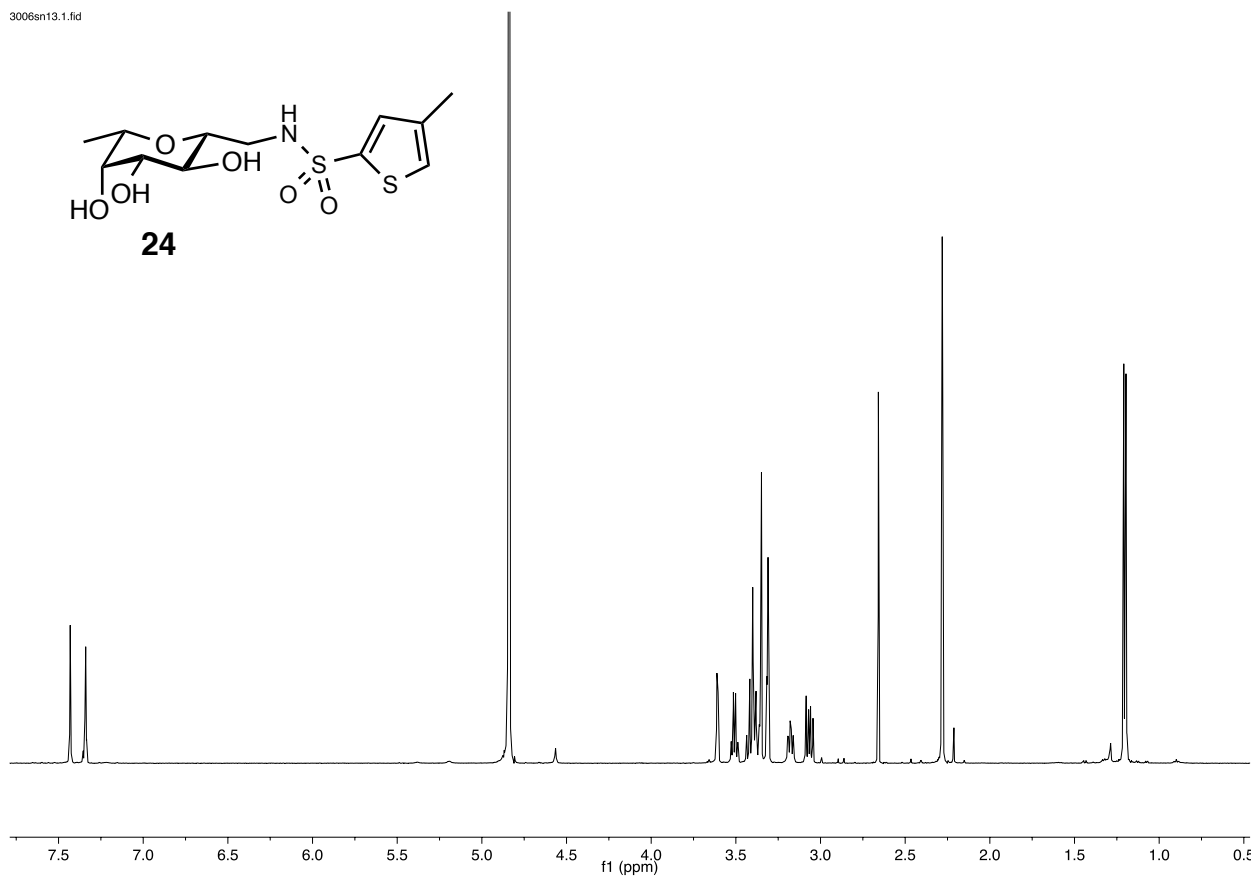

3006sn14.2.fid

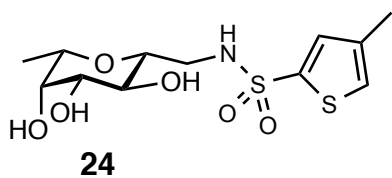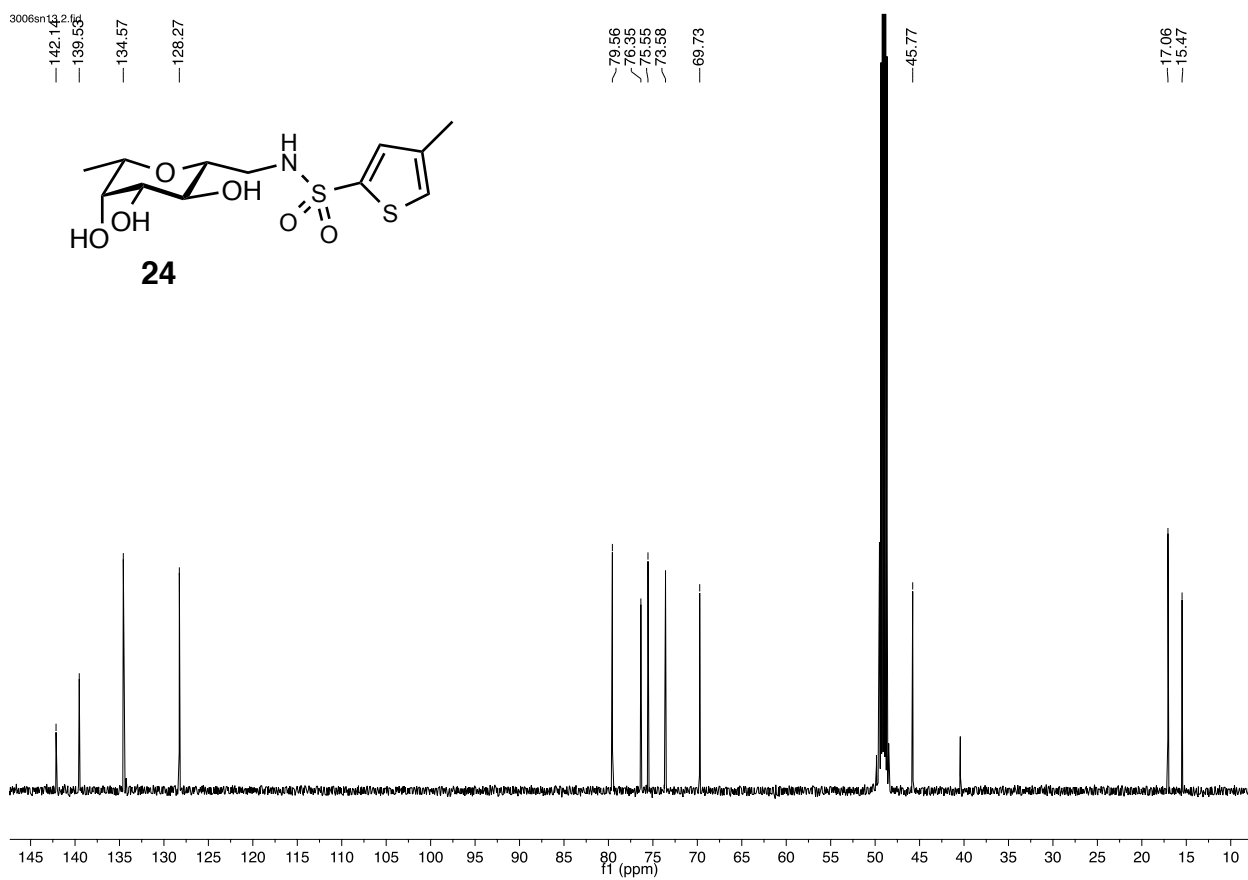

$^1\text{H}$ ,  $^{13}\text{C}$  and  $^{19}\text{F}$  spectra of new compounds

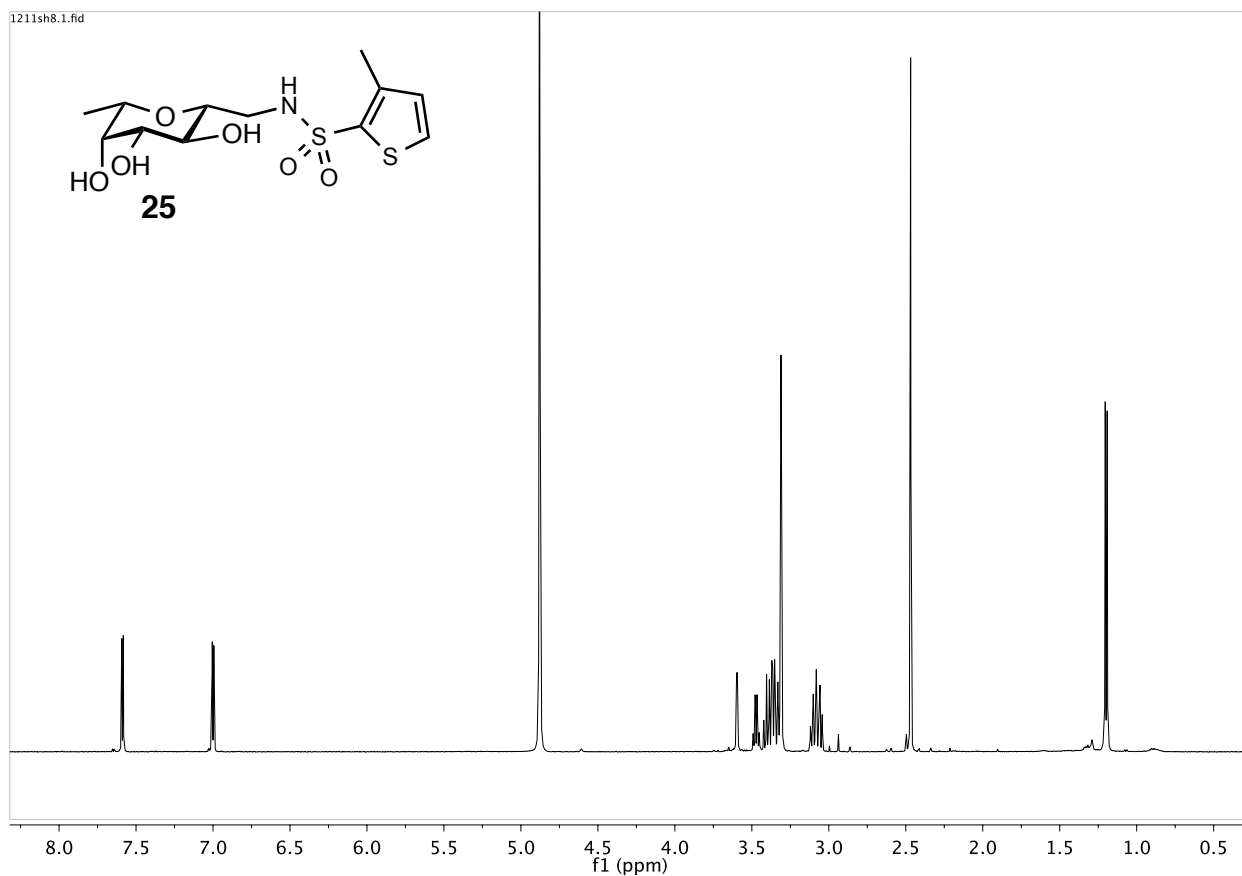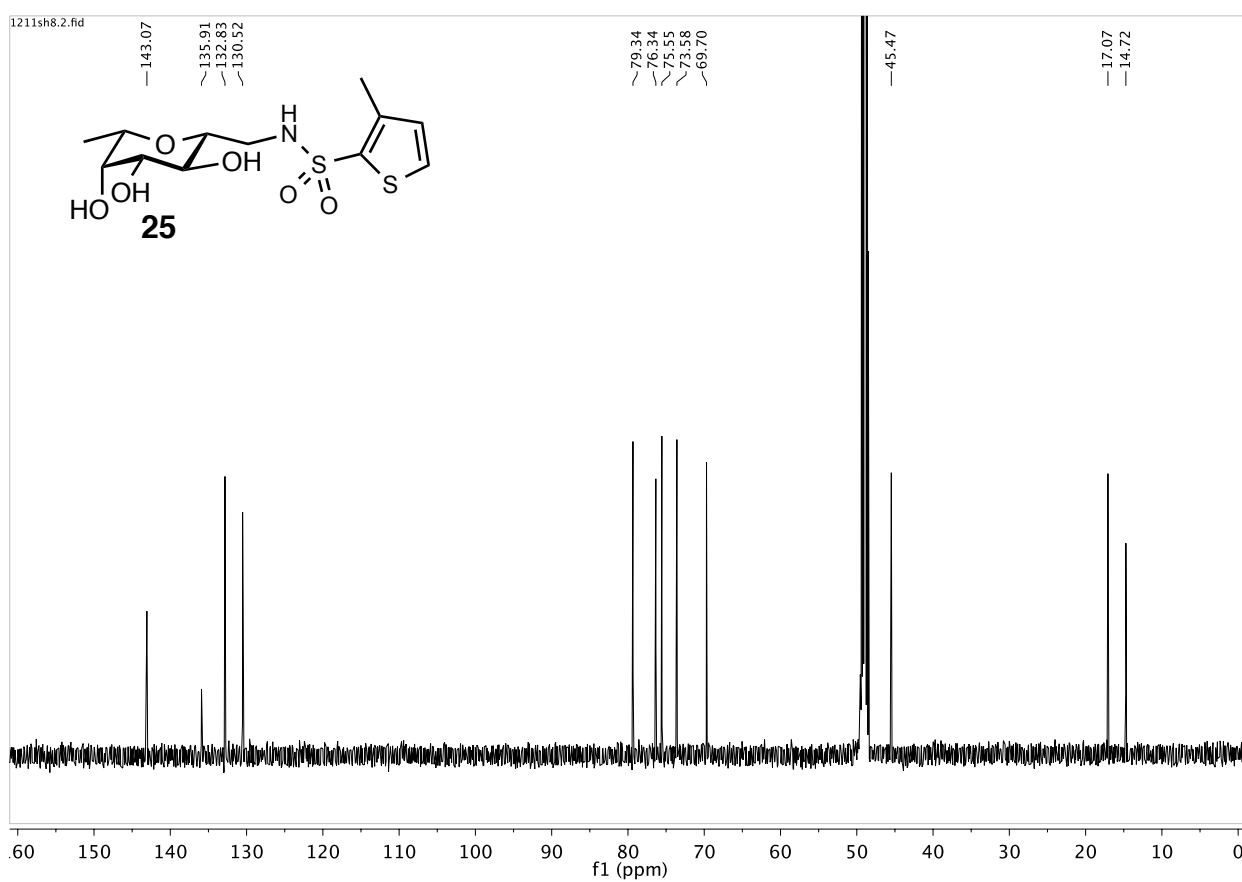

# $^1\text{H}$ , $^{13}\text{C}$ and $^{19}\text{F}$ spectra of new compounds

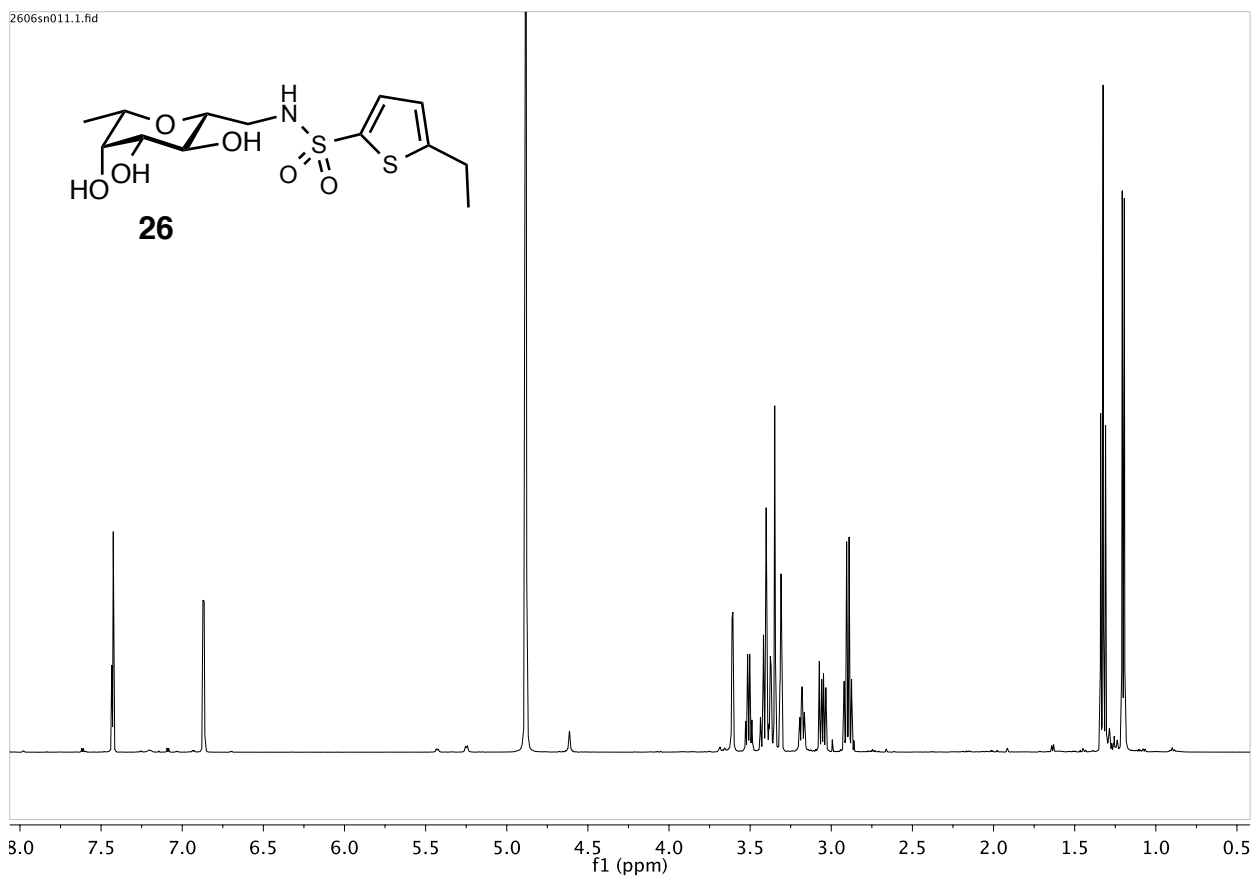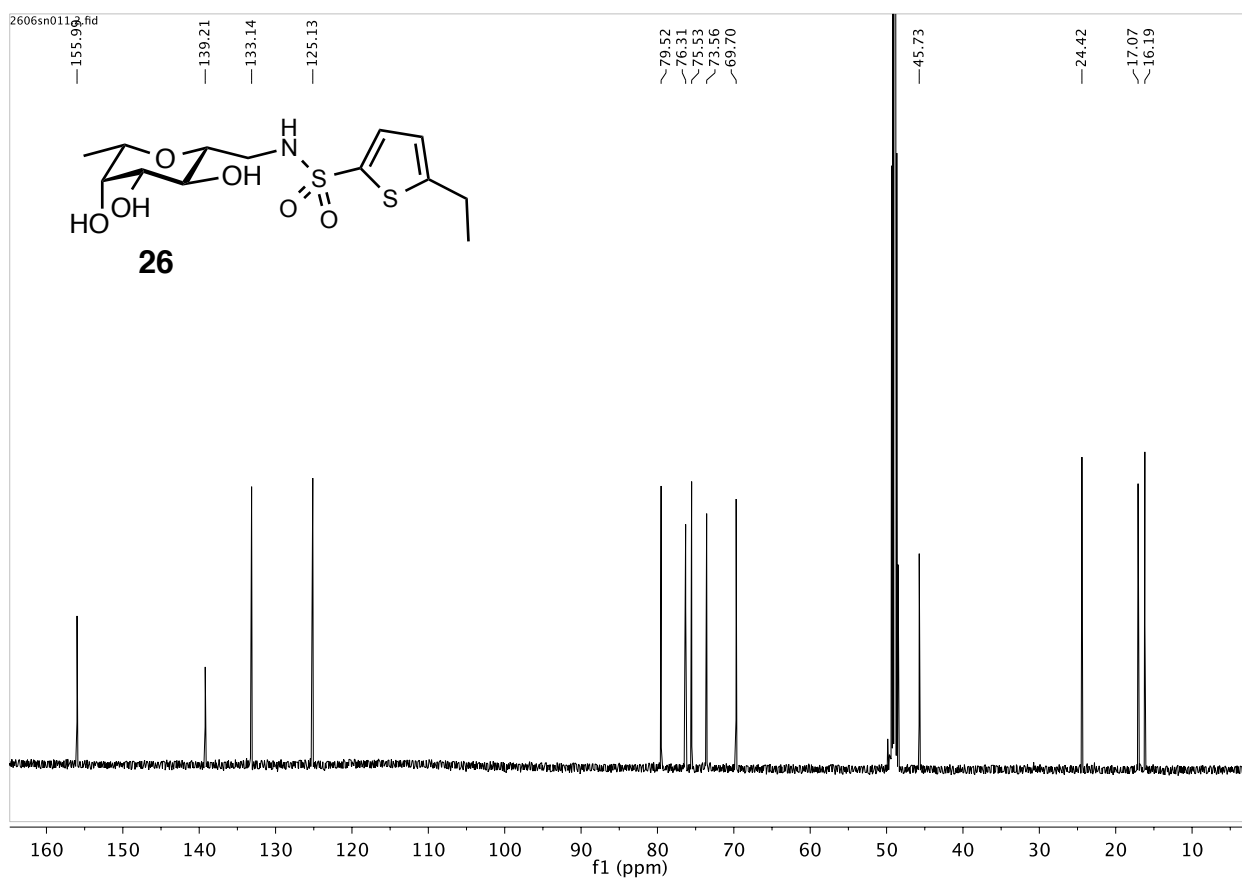

$^1\text{H}$ ,  $^{13}\text{C}$  and  $^{19}\text{F}$  spectra of new compounds

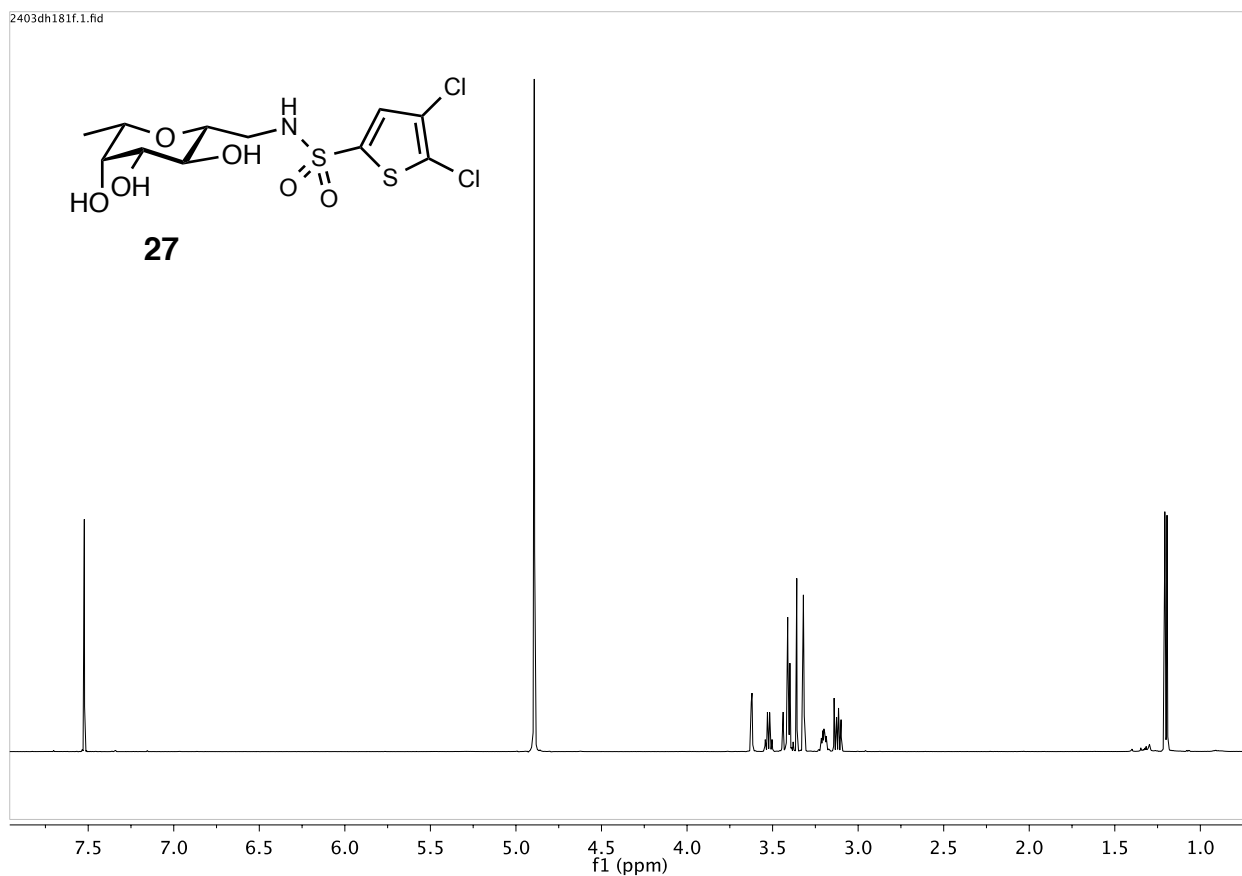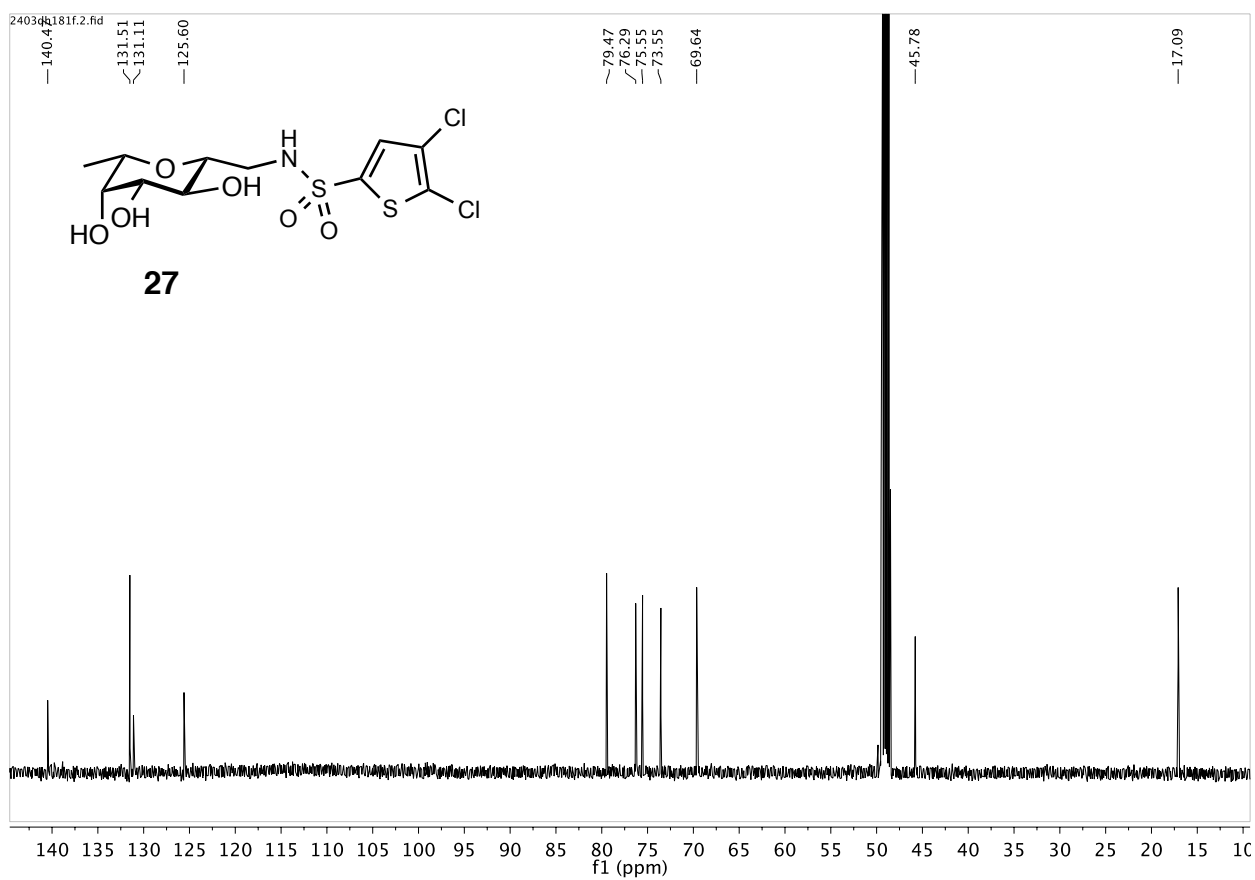

# $^1\text{H}$ , $^{13}\text{C}$ and $^{19}\text{F}$ spectra of new compounds

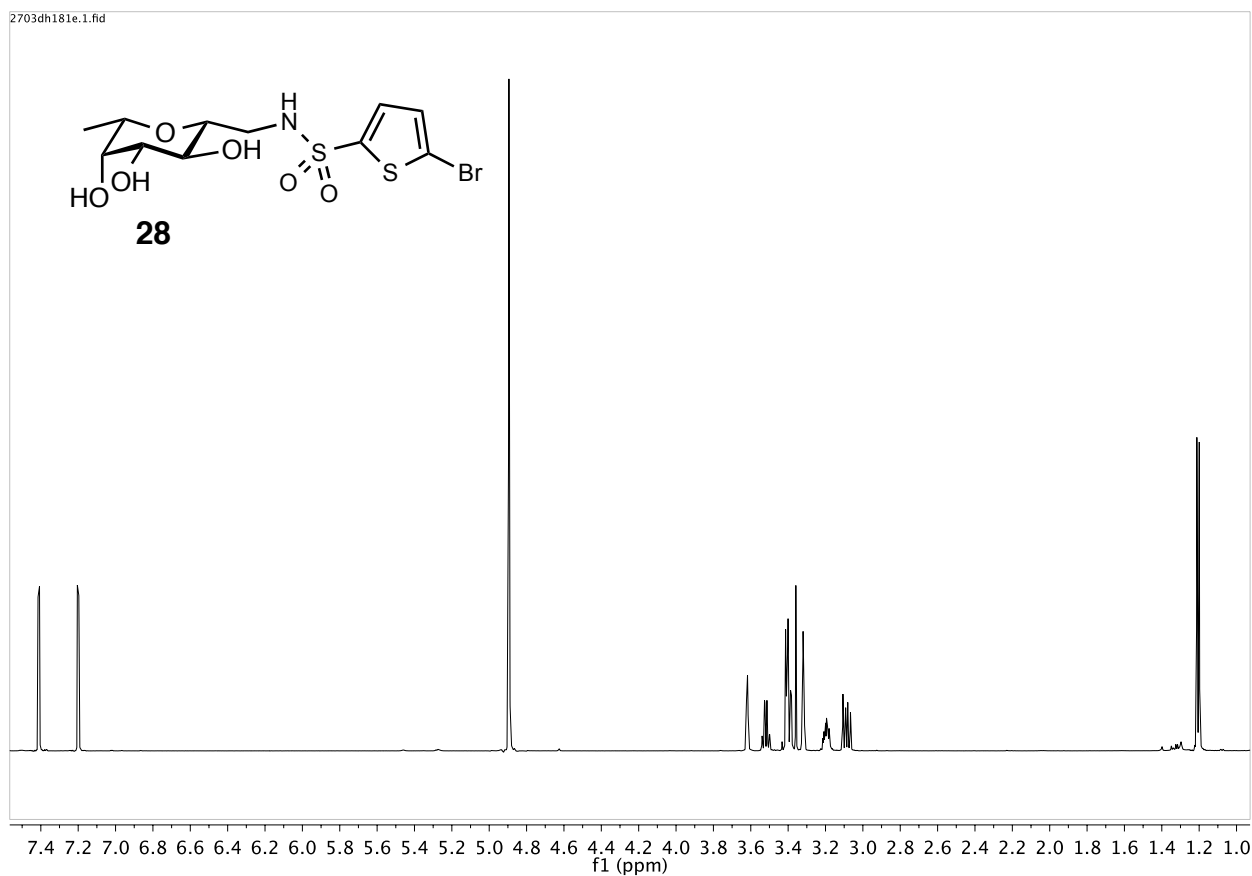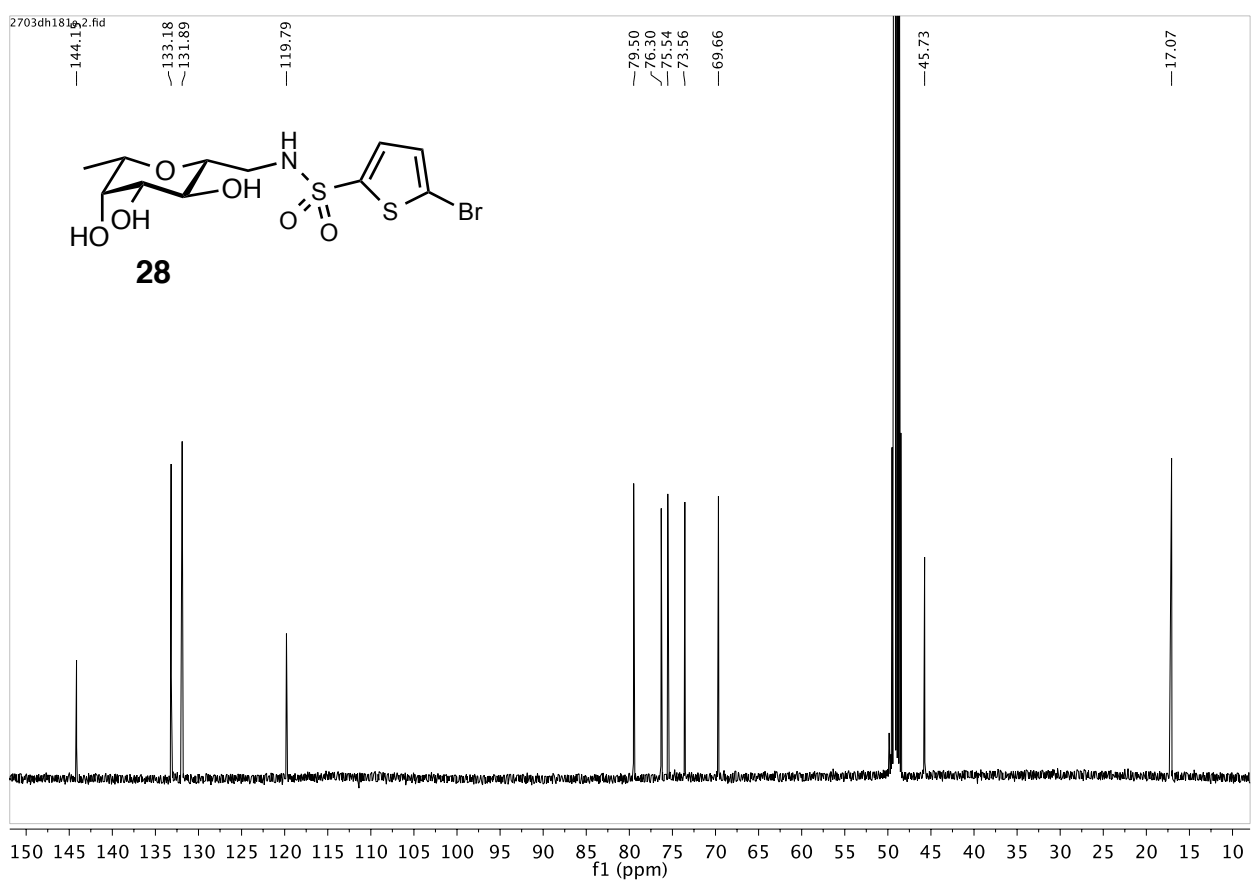



$^1\text{H}$ ,  $^{13}\text{C}$  and  $^{19}\text{F}$  spectra of new compounds

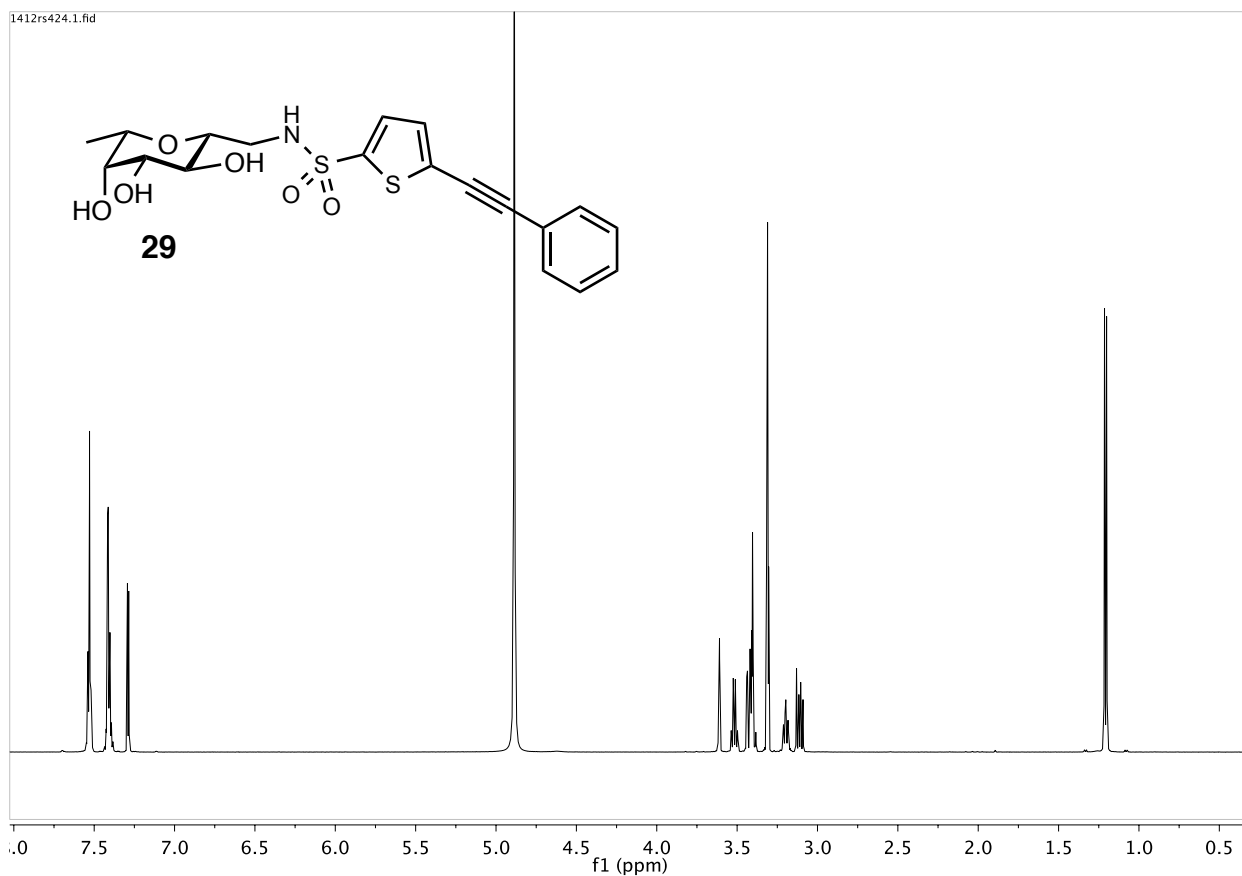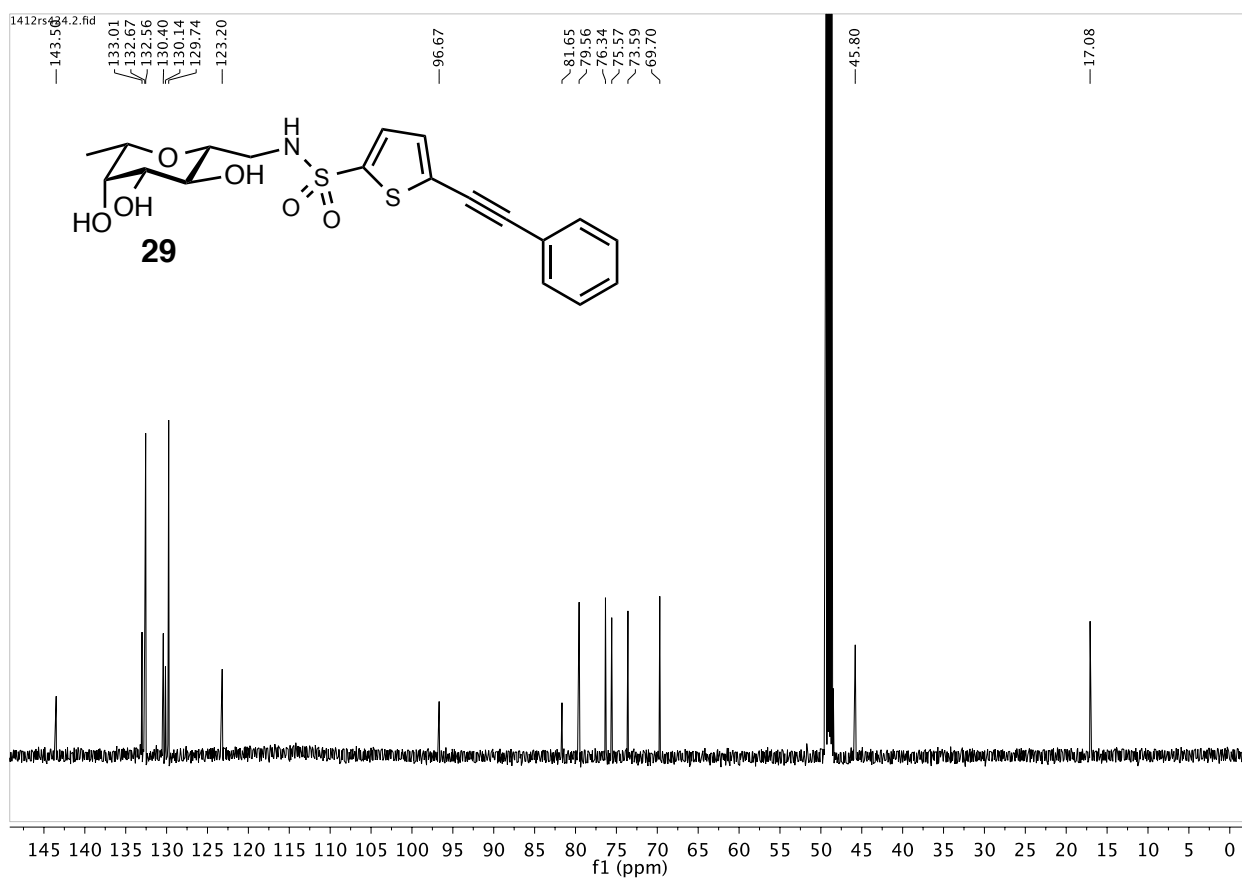

# $^1\text{H}$ , $^{13}\text{C}$ and $^{19}\text{F}$ spectra of new compounds

0911DH294Fr2.1.fid

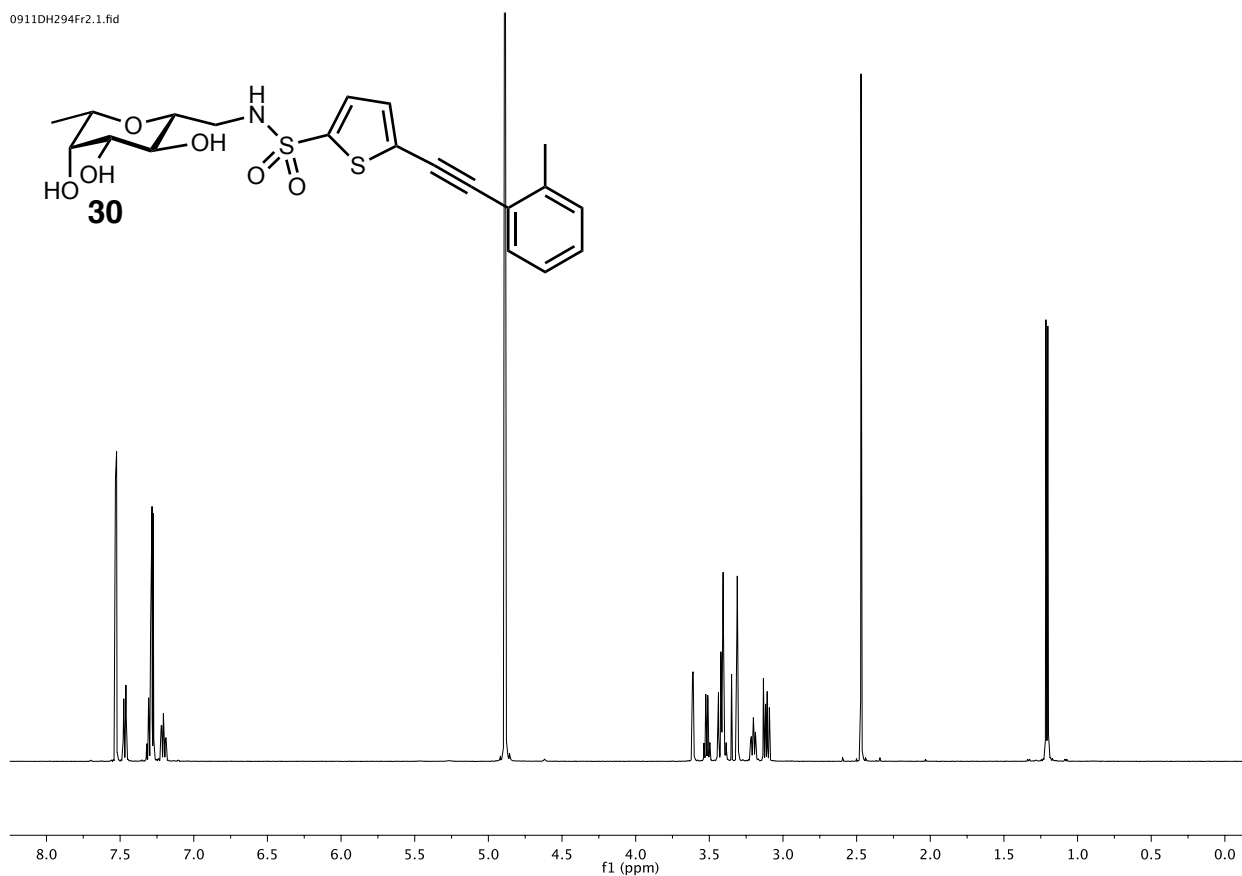

0911DH294Fr2.2.fid

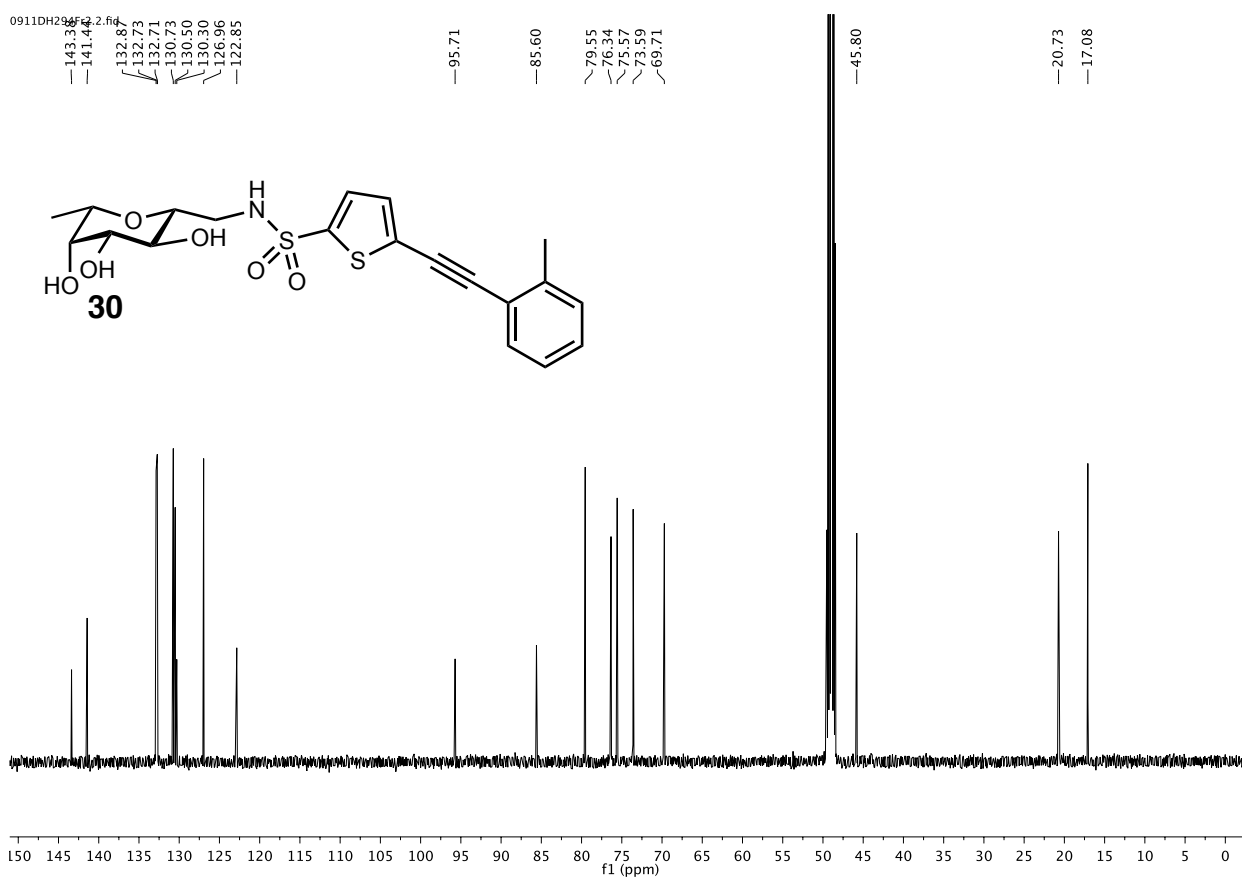

# $^1\text{H}$ , $^{13}\text{C}$ and $^{19}\text{F}$ spectra of new compounds

2507dh283.1.fid

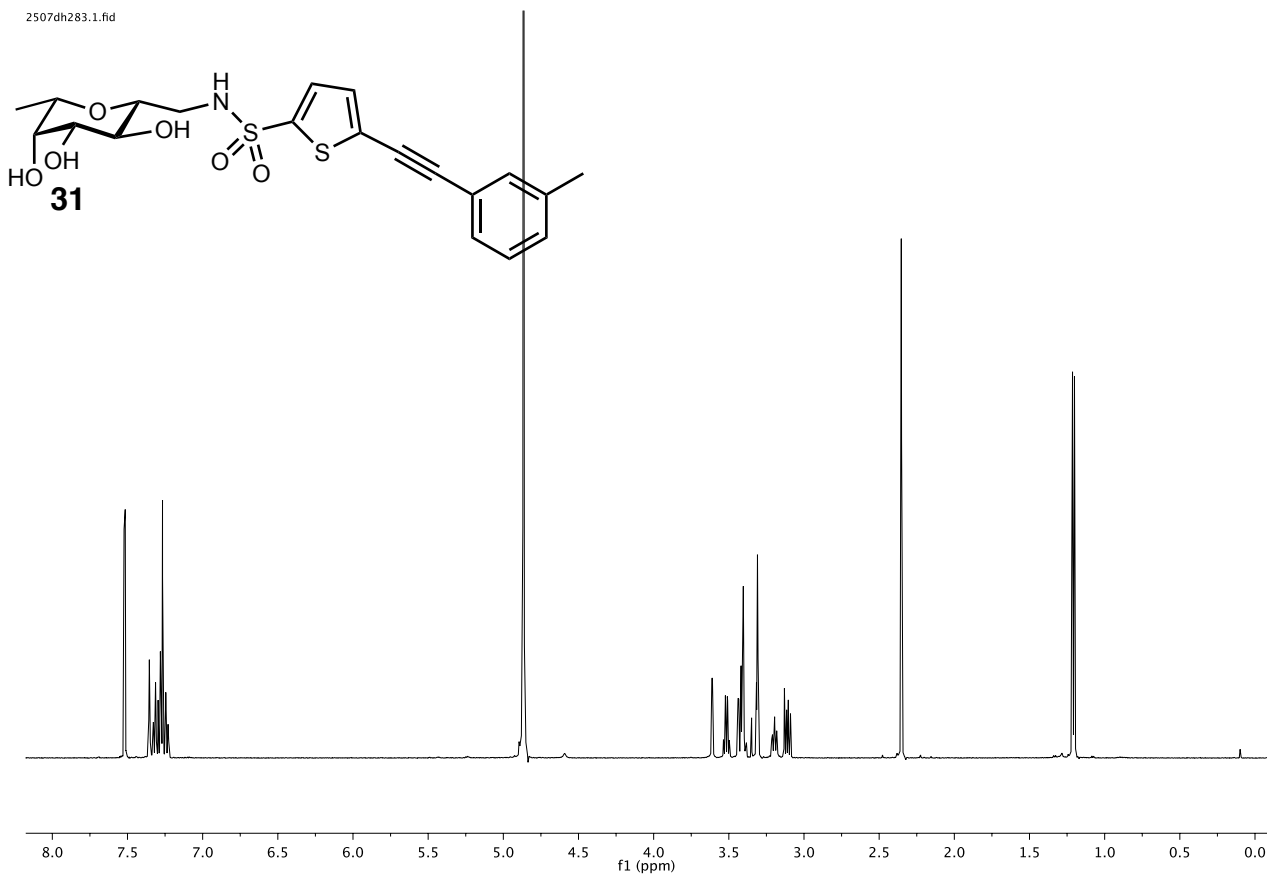

2507dh283.2.fid

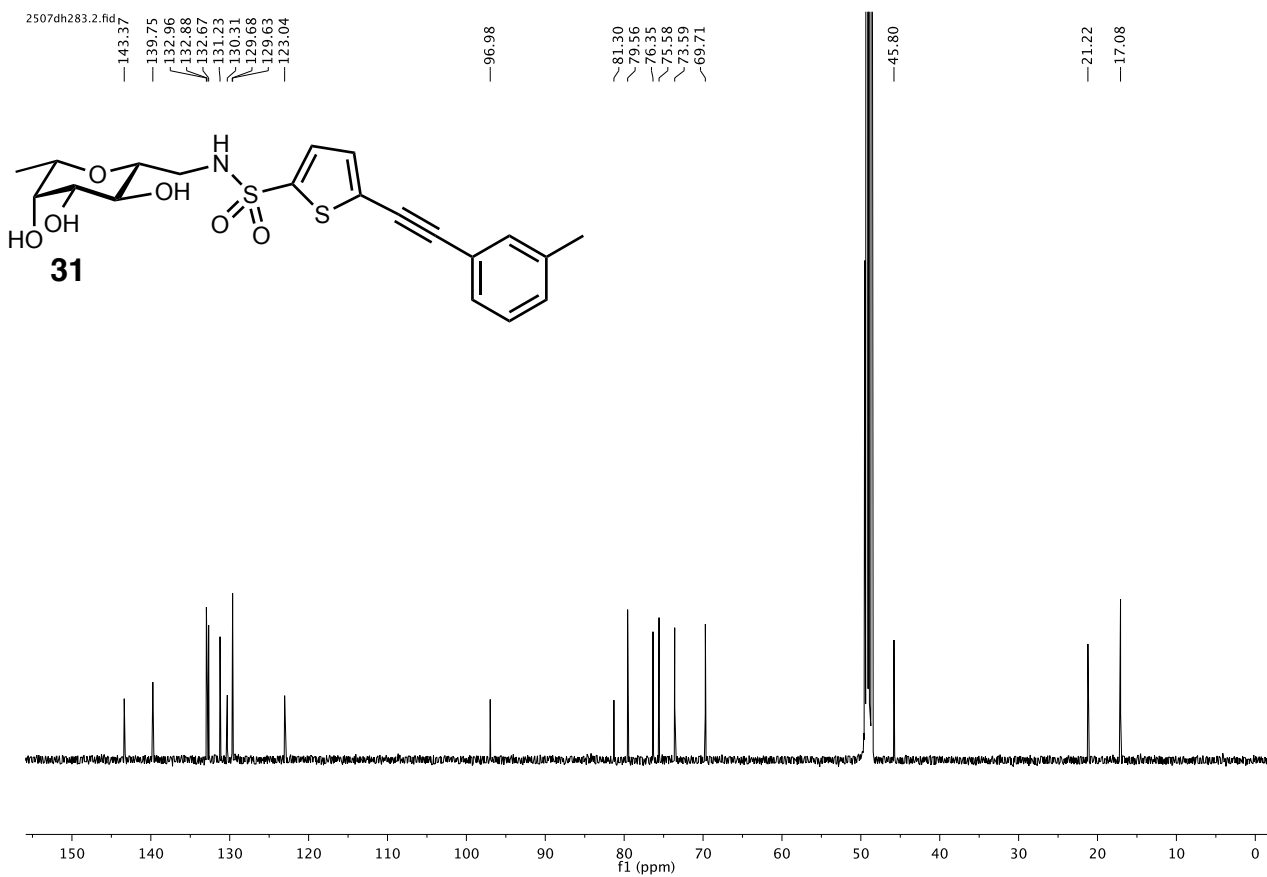

# $^1\text{H}$ , $^{13}\text{C}$ and $^{19}\text{F}$ spectra of new compounds

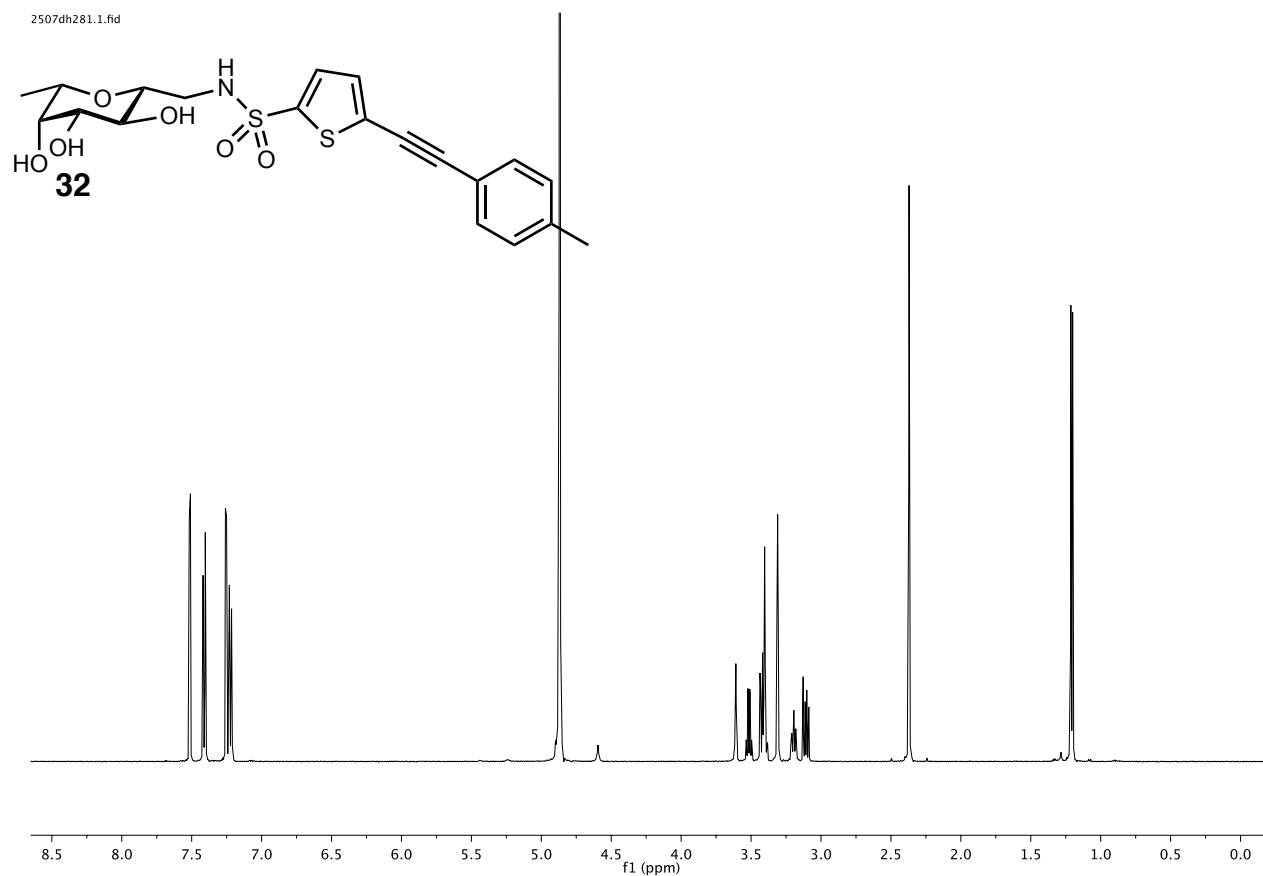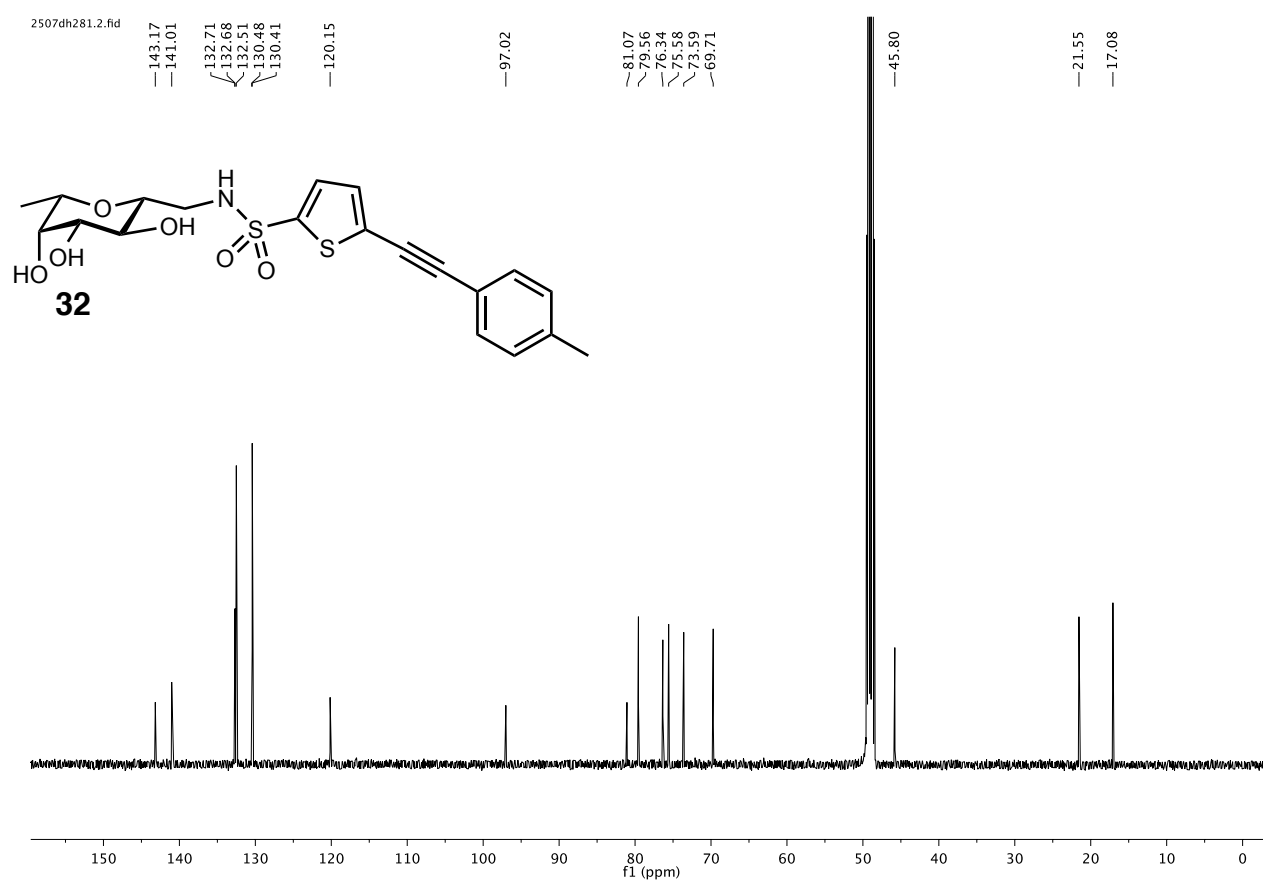

# $^1\text{H}$ , $^{13}\text{C}$ and $^{19}\text{F}$ spectra of new compounds

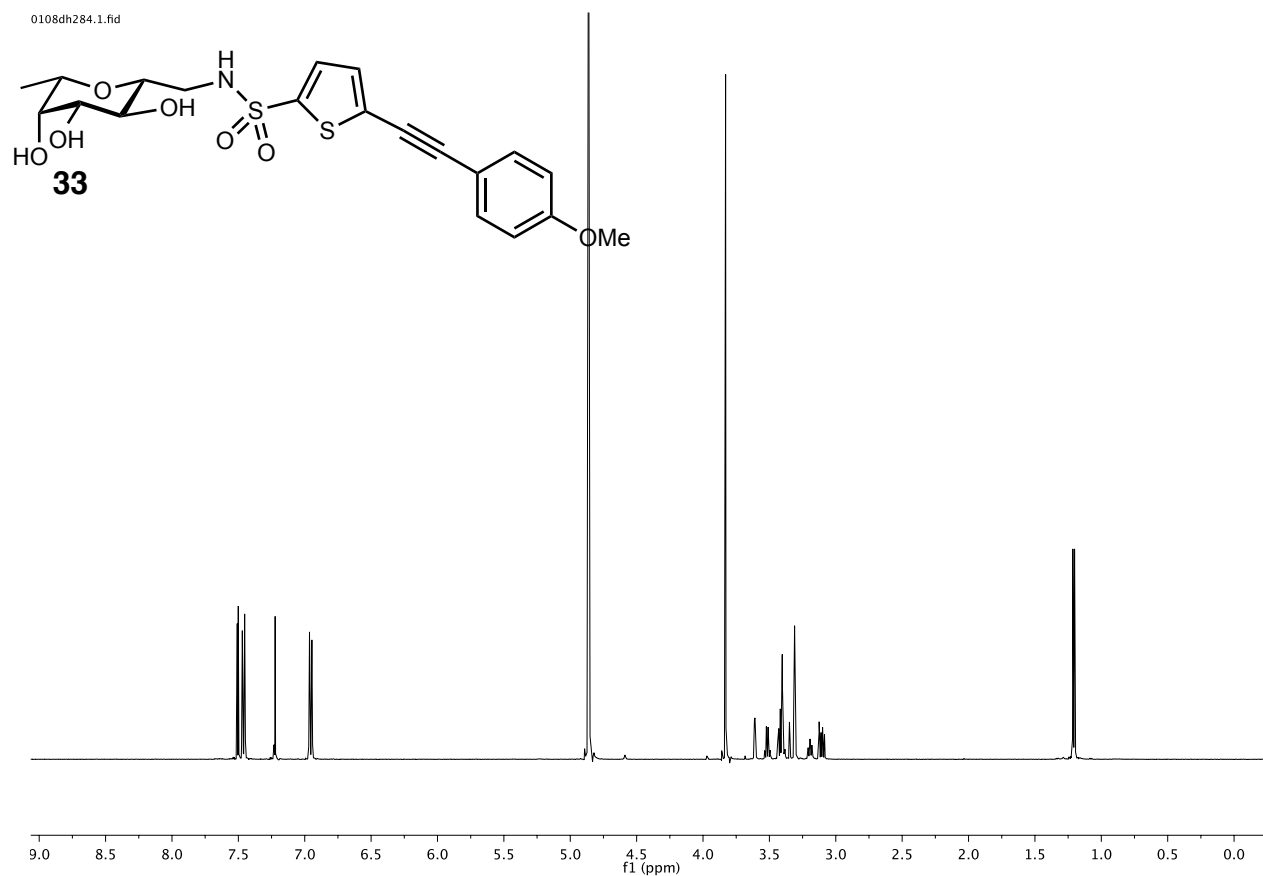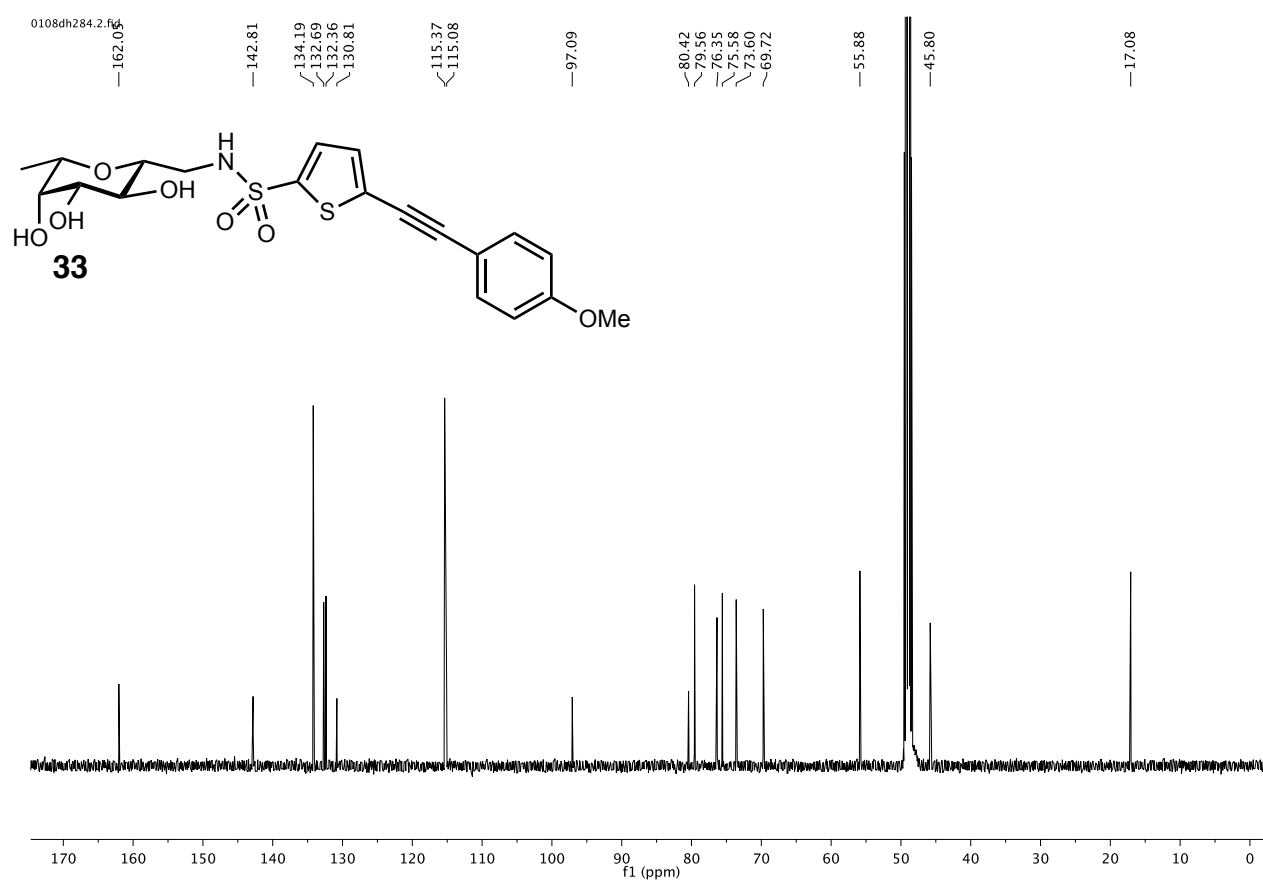

# $^1\text{H}$ , $^{13}\text{C}$ and $^{19}\text{F}$ spectra of new compounds

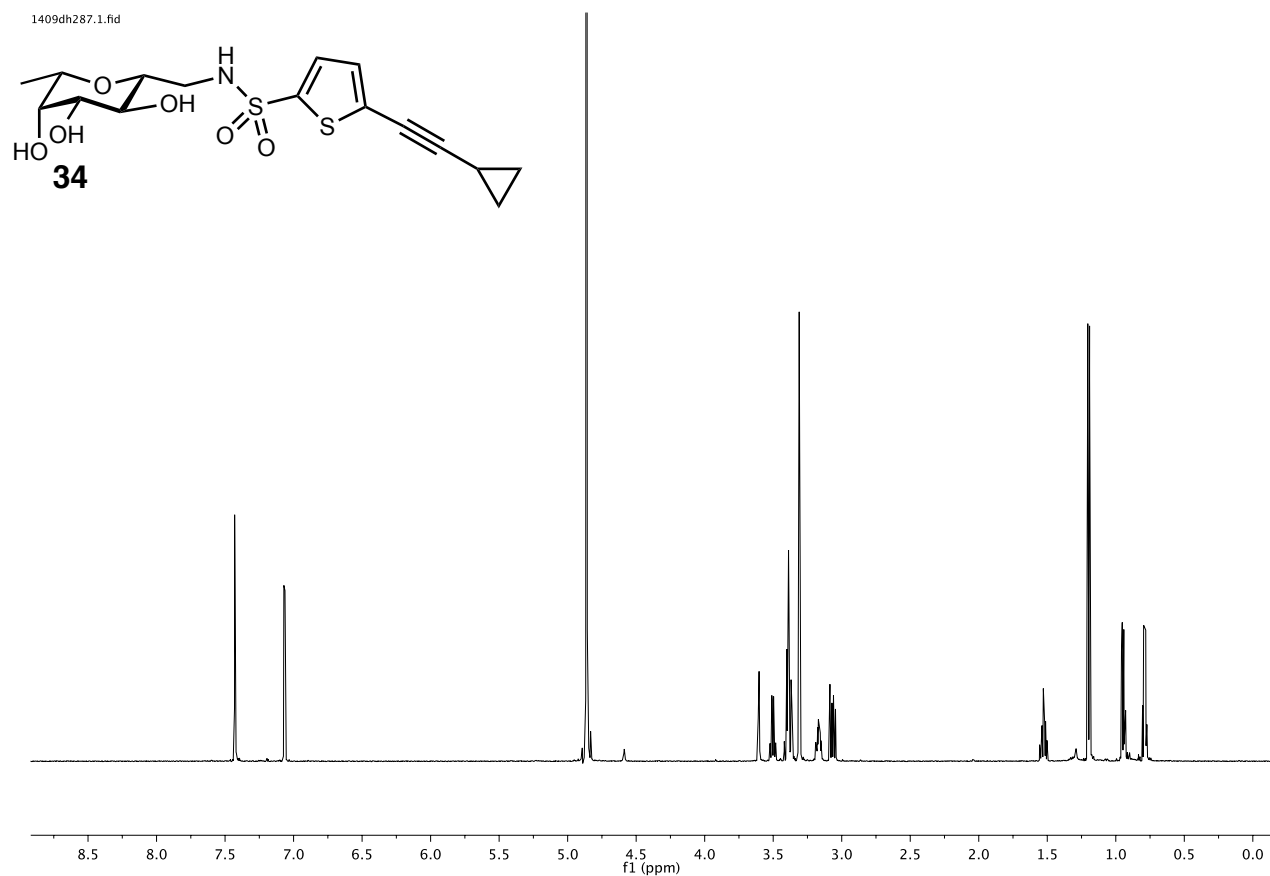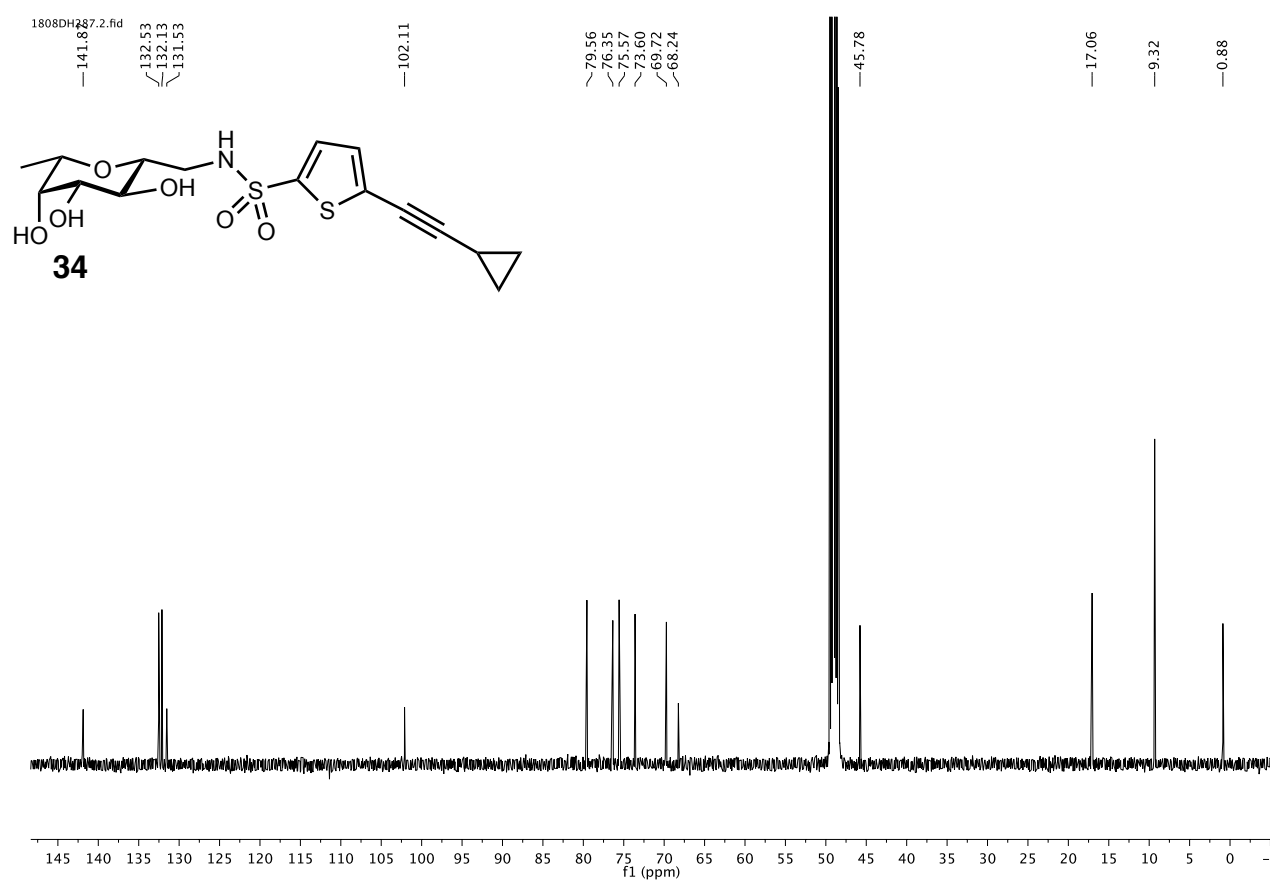

# $^1\text{H}$ , $^{13}\text{C}$ and $^{19}\text{F}$ spectra of new compounds

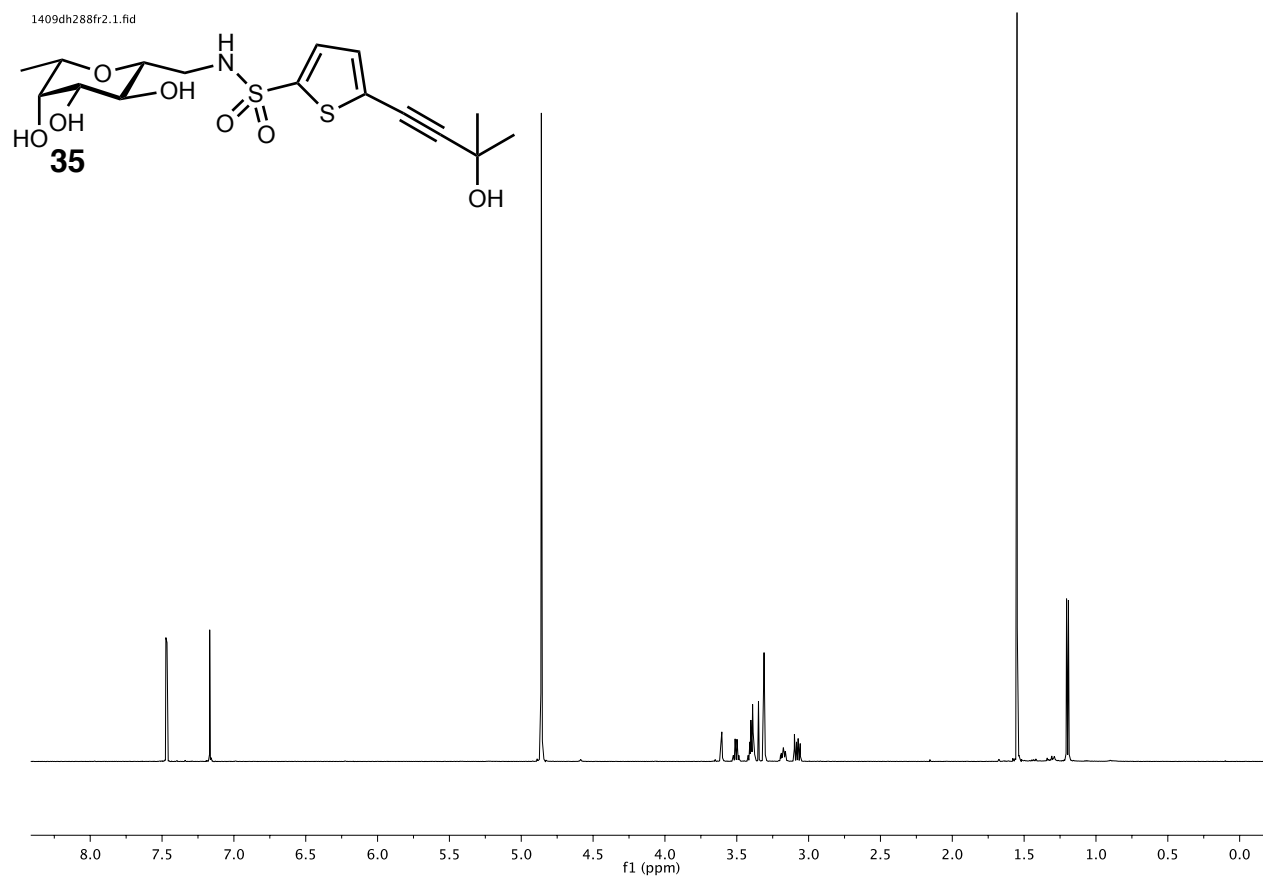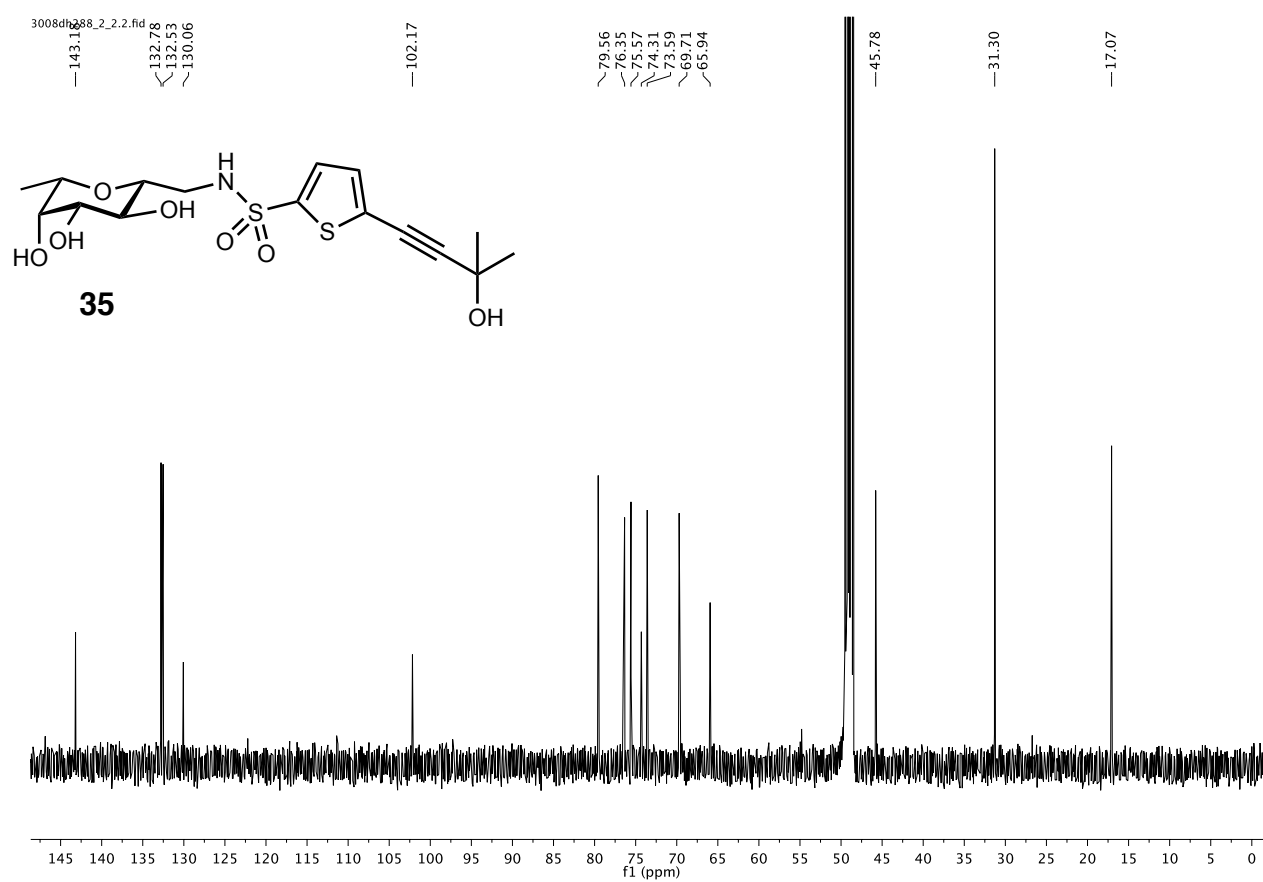

# $^1\text{H}$ , $^{13}\text{C}$ and $^{19}\text{F}$ spectra of new compounds

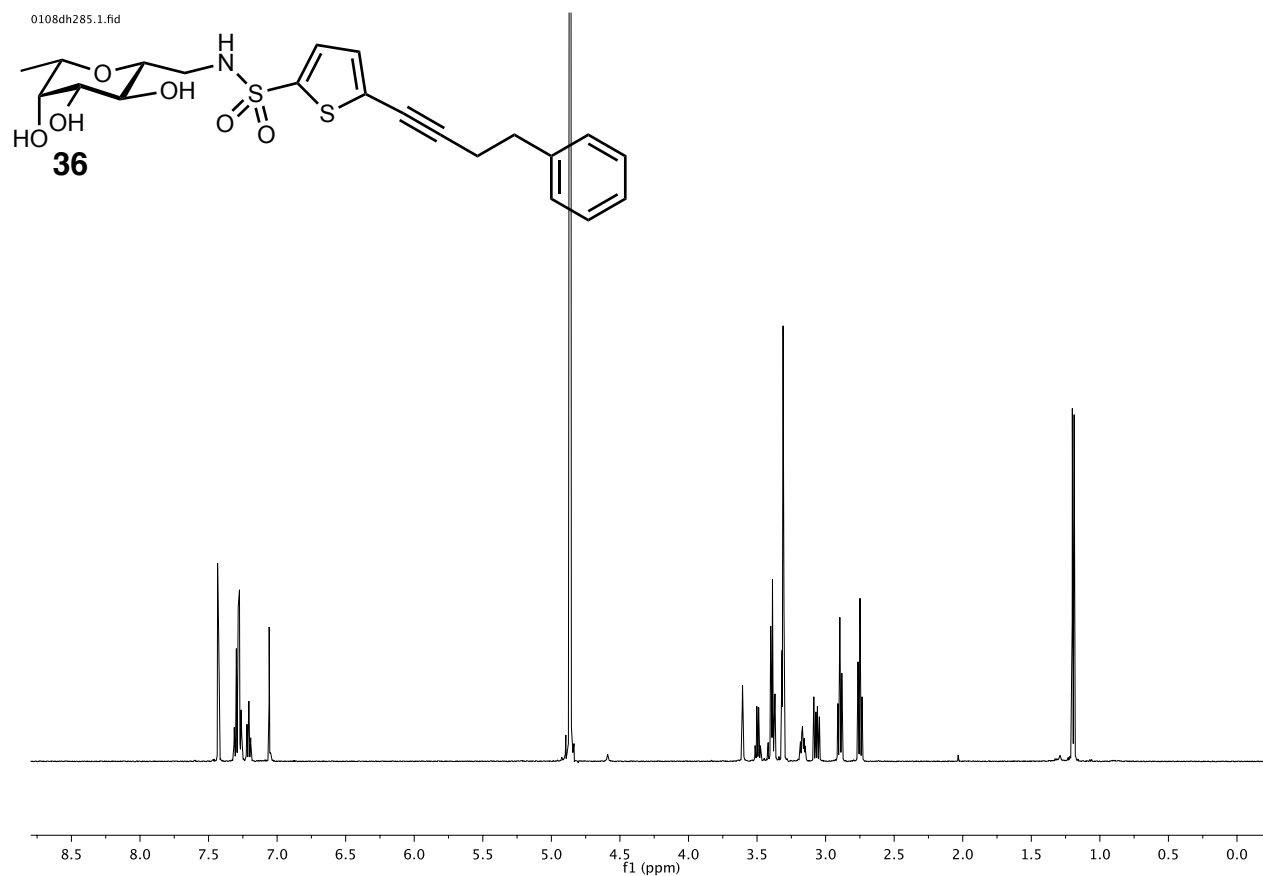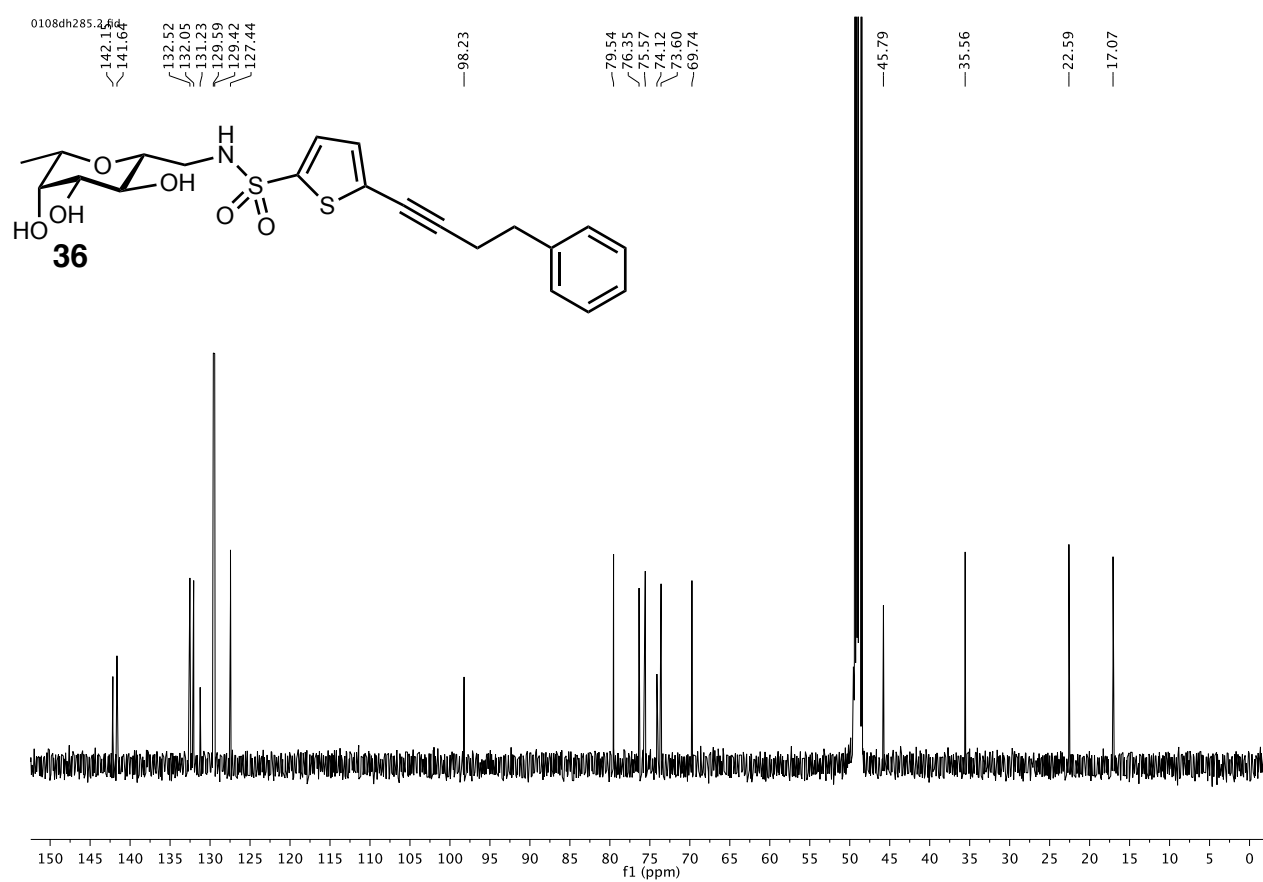



# $^1\text{H}$ , $^{13}\text{C}$ and $^{19}\text{F}$ spectra of new compounds

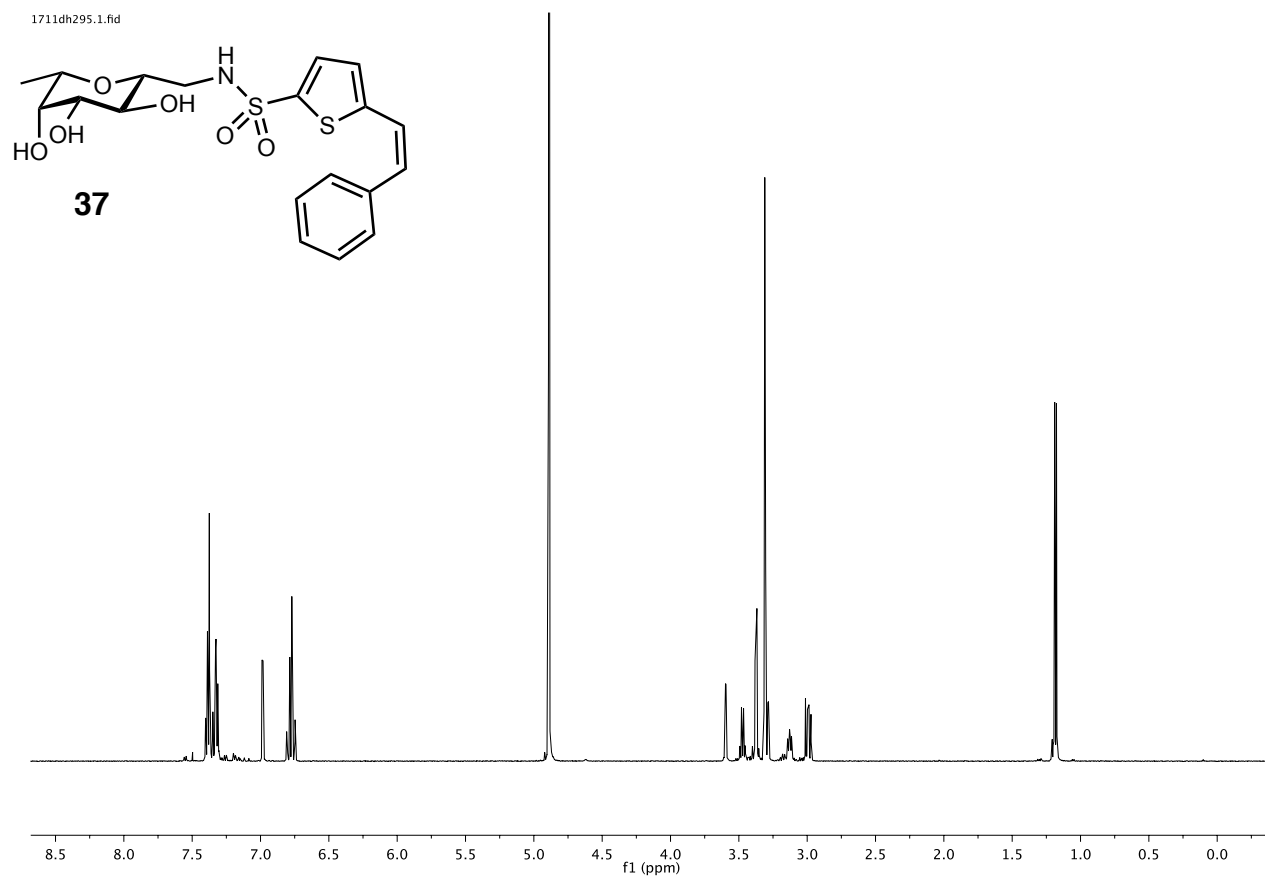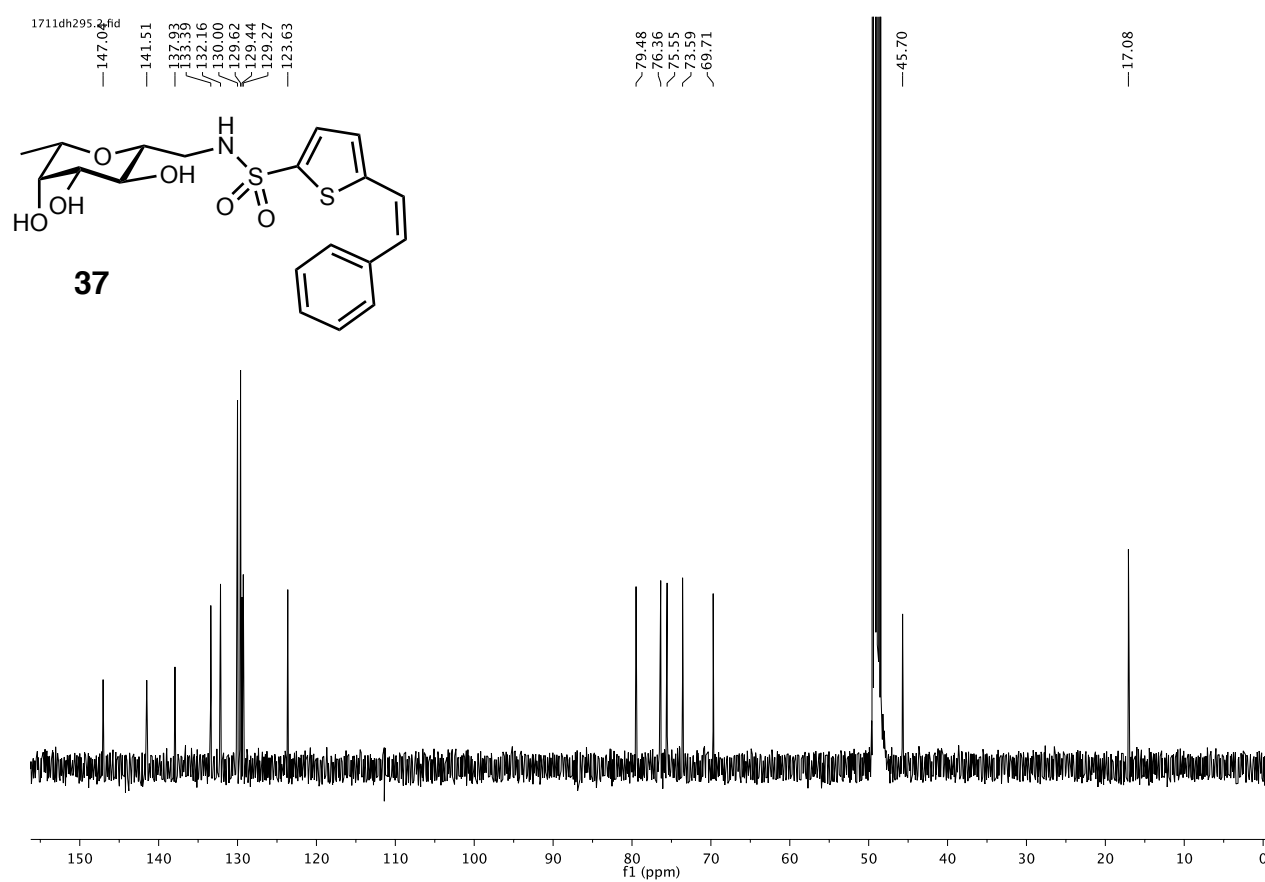

Table S1: ITC measurements with **22**

|                      | <b>LecB<sub>PAO1</sub> 64.3 μM</b>           | <b>LecB<sub>PAO1</sub> 60 μM</b>             | <b>LecB<sub>PAO1</sub> 60 μM</b>             |
|----------------------|----------------------------------------------|----------------------------------------------|----------------------------------------------|
|                      | <b>22 1.0 mM</b>                             | <b>22 750 μM</b>                             | <b>22 600 μM</b>                             |
|                      | TBS supplemented with 1 mM CaCl <sub>2</sub> | TBS supplemented with 1 mM CaCl <sub>2</sub> | TBS supplemented with 1 mM CaCl <sub>2</sub> |
|                      |                                              |                                              |                                              |
| <b>Ka [1/M]</b>      | 9.07E+05                                     | 7.14E+05                                     | 9.15E+05                                     |
| <b>ΔH [cal/mol]</b>  | -10980                                       | -11420                                       | -11520                                       |
| <b>Δs [cal/molK]</b> | -9.53                                        | -11.5                                        | -11.4                                        |
| <b>Kd [M]</b>        | 1.1E-06                                      | 1.4E-06                                      | 1.09E-06                                     |
| <b>N</b>             | 1.02                                         | 0.96                                         | 0.974                                        |
| <b>ΔG [cal/mol]</b>  | -8140                                        | -7990                                        | -8120                                        |

|                      | <b>LecB<sub>PA14</sub> 236 μM</b>            | <b>LecB<sub>PA14</sub> 236 μM</b>            | <b>LecB<sub>PA14</sub> 151 μM</b>            | <b>LecB<sub>PA14</sub> 140 μM</b>            |
|----------------------|----------------------------------------------|----------------------------------------------|----------------------------------------------|----------------------------------------------|
|                      | <b>22 2.3 mM</b>                             | <b>22 2.0 mM</b>                             | <b>22 1.5 mM</b>                             | <b>22 1.3 mM</b>                             |
|                      | TBS supplemented with 1 mM CaCl <sub>2</sub> |
|                      |                                              |                                              |                                              |                                              |
| <b>Ka [1/M]</b>      | 4.11E+06                                     | 3.69E+06                                     | 2.53E+06                                     | 2.77E+06                                     |
| <b>ΔH [cal/mol]</b>  | -9492                                        | -9402                                        | -9954                                        | -9835                                        |
| <b>Δs [cal/molK]</b> | -1.52                                        | -1.45                                        | -4.09                                        | -3.48                                        |
| <b>Kd [M]</b>        | 2.43E-07                                     | 2.71E-07                                     | 3.95E-07                                     | 3.61E-07                                     |
| <b>N</b>             | 0.964                                        | 1.07                                         | 0.895                                        | 1.11                                         |
| <b>ΔG [cal/mol]</b>  | -9040                                        | -8970                                        | -8730                                        | -8800                                        |

Table S2: Data collection and refinement statistics for LecB<sub>PA14</sub> in complex with 22

| LecB <sub>PA14</sub> in complex with 22             |                                      |      |      |      |
|-----------------------------------------------------|--------------------------------------|------|------|------|
| <b>Data collection</b>                              |                                      |      |      |      |
| Beamline                                            | ID23-2                               |      |      |      |
| Wavelength                                          | 0.87260                              |      |      |      |
| Space group                                         | P6 <sub>1</sub>                      |      |      |      |
| Unit cell dimensions                                | 49.88 49.88 288.75 90.00 90.00 90.00 |      |      |      |
| Resolution (Å)                                      | 37.07-1.45 (1.47-1.45)               |      |      |      |
| Nb reflections                                      | 808656                               |      |      |      |
| Nb uniques reflections                              | 71656                                |      |      |      |
| <i>R</i> <sub>merge</sub>                           | 0.057 (0.308)                        |      |      |      |
| <i>R</i> <sub>pim</sub>                             | 0.026 (0.141)                        |      |      |      |
| Mean <i>I</i> / σ <i>I</i>                          | 27.1 (7.6)                           |      |      |      |
| Completeness (%)                                    | 100.00 (100.00)                      |      |      |      |
| Redundancy                                          | 11.3 (11.0)                          |      |      |      |
| CC1/2                                               | 100.0 (98.0)                         |      |      |      |
| <b>Refinement</b>                                   |                                      |      |      |      |
| Resolution (Å)                                      | 37.07-1.45                           |      |      |      |
| No. reflections/No. free reflections                | 67895/3598                           |      |      |      |
| <i>R</i> <sub>work</sub> / <i>R</i> <sub>free</sub> | 12.4 / 14.3                          |      |      |      |
| R.m.s Bond lengths (Å)                              | 0.016                                |      |      |      |
| Rmsd Bond angles (°)                                | 2.043                                |      |      |      |
| Rmsd Chiral (°)                                     | 0.103                                |      |      |      |
| No. atoms (Chain)                                   | A                                    | B    | C    | D    |
| Protein                                             | 862                                  | 883  | 853  | 868  |
| Sugar                                               | 22                                   | 22   | 22   | 22   |
| Calcium                                             | 2                                    | 2    | 2    | 2    |
| Waters                                              | 150                                  | 175  | 166  | 169  |
| <i>B</i> -factors (Å <sup>2</sup> )                 |                                      |      |      |      |
| Protein                                             | 10.5                                 | 10.0 | 10.4 | 9.6  |
| Sugar                                               | 15.3                                 | 10.3 | 12.2 | 10.8 |
| Calcium                                             | 8.6                                  | 7.4  | 8.3  | 7.0  |
| Waters                                              | 24.0                                 | 25.8 | 24.7 | 24.6 |
| Ramachandran                                        |                                      |      |      |      |
| Allowed                                             | 99.8                                 |      |      |      |
| Favored                                             | 97.1                                 |      |      |      |
| Outliers                                            | 1                                    |      |      |      |
| PDB Code                                            | 5MAZ                                 |      |      |      |

**Table S3:** m/z search window for plasma stability assay

| <b>name</b>  | <b>start-stop [m/z]</b> |
|--------------|-------------------------|
| naproxen     | 230-232                 |
| glipizide    | 444.5-447               |
| procaine     | 236-237.5               |
| procainamide | 235.5-236.6             |
| propoxycaine | 294.4-295.8             |
| <b>17</b>    | 320-321.8               |
| <b>22</b>    | 349.8-351               |
| <b>23</b>    | 335.8-337               |
| <b>27</b>    | 389-390.4               |
| <b>29</b>    | 421-423.1               |

**Table S4:** Mass transitions of compounds

| compound  | Q1 mass | Q3 mass | Time [msec] | DP [volts] | CE [volts] | CXP [volts] |
|-----------|---------|---------|-------------|------------|------------|-------------|
| <b>6</b>  | 357.966 | 183.0   | 30          | -140       | -34        | -19         |
|           | 357.966 | 197.9   | 30          | -140       | -36        | -23         |
| <b>7</b>  | 321.888 | 146.8   | 30          | -140       | -30        | -15         |
|           | 321.888 | 230.0   | 30          | -140       | -28        | -21         |
|           |         |         |             |            |            |             |
| <b>17</b> | 320.91  | 238.2   | 30          | -30        | -18        | -13         |
|           | 320.91  | 82.0    | 30          | -30        | -20        | -9          |
|           | 320.91  | 40.0    | 30          | -30        | -66        | -17         |
| <b>22</b> | 349.98  | 174.6   | 30          | -90        | -30        | -7          |
|           | 349.98  | 110.9   | 30          | -90        | -38        | -11         |
| <b>23</b> | 335.899 | 175.9   | 30          | -115       | -32        | -17         |
|           | 335.899 | 160.9   | 30          | -115       | -30        | -15         |
| <b>29</b> | 421.93  | 182.9   | 30          | -135       | -40        | -19         |
|           | 421.93  | 198.8   | 30          | -135       | -34        | -17         |
|           |         |         |             |            |            |             |
| <b>3</b>  | 374.003 | 198.0   | 30          | -135       | -34        | -19         |
|           | 374.003 | 182.9   | 30          | -135       | -32        | -17         |
| <b>45</b> | 337.881 | 161.8   | 30          | -130       | -34        | -17         |
|           | 337.881 | 146.8   | 30          | -130       | -30        | -15         |
|           |         |         |             |            |            |             |
| Naproxene | 231.106 | 185.1   | 50          | 80         | 19         | 10          |
|           | 231.106 | 170.2   | 50          | 80         | 33         | 12          |
| Caffeine  | 195.024 | 138.0   | 30          | 80         | 25         | 14          |
|           | 195.024 | 110.0   | 30          | 80         | 31         | 18          |

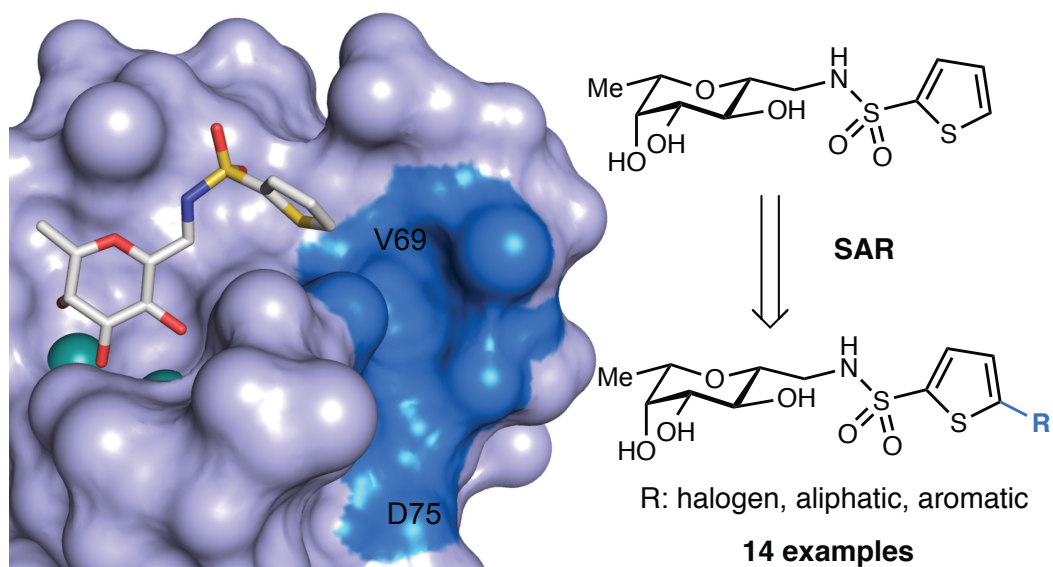

**Figure S1:** Rationale for the extension of the thiophene moiety in **7** to target an additional patch or a subpocket on the surface of LecB

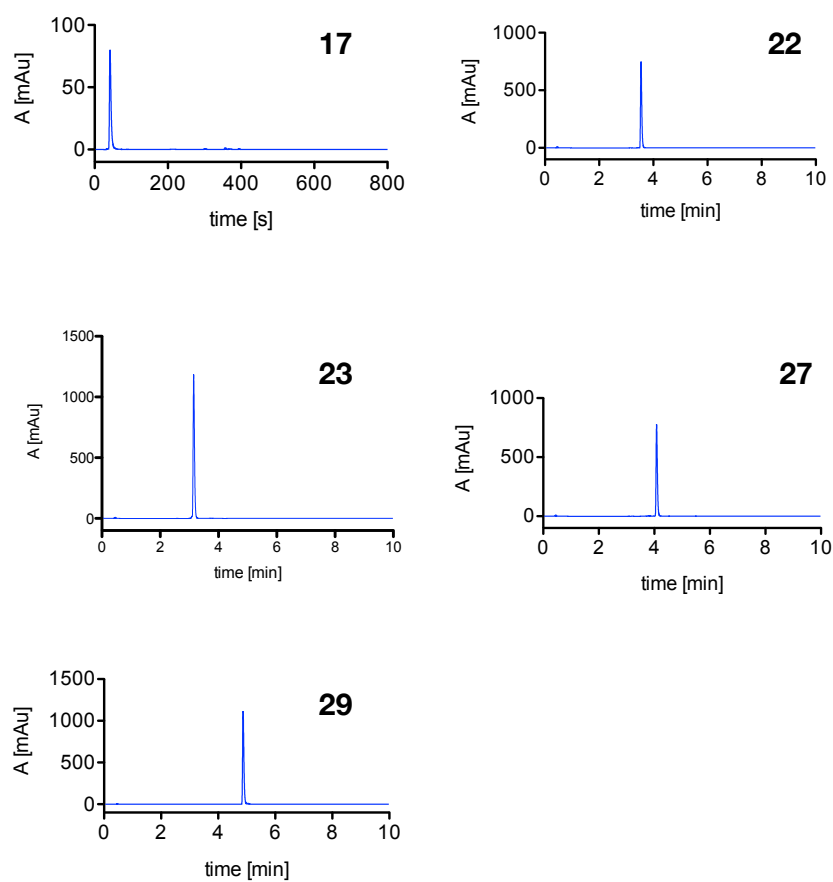

**Figure S2:** Purity of key compounds **17**, **22**, **23**, **27**, **29** by HPLC-UV
